# Supplementary material
Source: PubMed Central journal article supplement (PMC6755904)
Supplement: NIHMS1045593-supplement-Supporting_Information.pdf [file NIHMS1045593-supplement-Supporting_Information.pdf]

# Supporting Information

## SAR Studies on Acylhydrazones as Inhibitors of Fungal Sphingolipids for the Development of Novel Antifungal Agents

Krupanandan Haranahalli<sup>a,d,†</sup>, Cristina Lazzarini<sup>b,c,†</sup>, Yi Sun<sup>d</sup>, Julia Zambito<sup>d</sup>, Senuri Pathirana<sup>d</sup>,

John B. McCarthy<sup>e</sup>, John Mallamo<sup>e</sup>, Maurizio Del Poeta<sup>a,b,c,f</sup>, and Iwao Ojima<sup>a,d,\*</sup>

<sup>a</sup>Institute of Chemical Biology and Drug Discovery, Stony Brook University, Stony Brook, New York, USA;

<sup>b</sup>Department of Molecular Genetics and Microbiology, Stony Brook University, Stony Brook, New York, USA;

<sup>c</sup>Veterans Administration Medical Center, Northport, NY, USA;

<sup>d</sup>Department of Chemistry, Stony Brook University, Stony Brook, New York, USA;

<sup>e</sup>MicroRid Technologies Inc., Dix Hills, New York, USA;

<sup>f</sup>Division of Infectious Diseases, School of Medicine, Stony Brook University, New York, USA;

<sup>†</sup> Contributed equally

\* Corresponding Author

## Table of contents

<sup>1</sup>H NMR and <sup>13</sup>C NMR of compounds **5.0-5.7**, **5.8-5.10d**, **5.11-5.23c**, **5.21**, **5.24-5.26**, **5.0a-5.27a**, **6a**, **6b**, **5.28**, **5.2i-5.3h**, **5.29** and **5.30** Pages 1-86

\* To whom correspondences should be addressed. Phone 631-632-1339; fax 631-632-7942; e-mail, iwao.ojima@stonybrook.edu

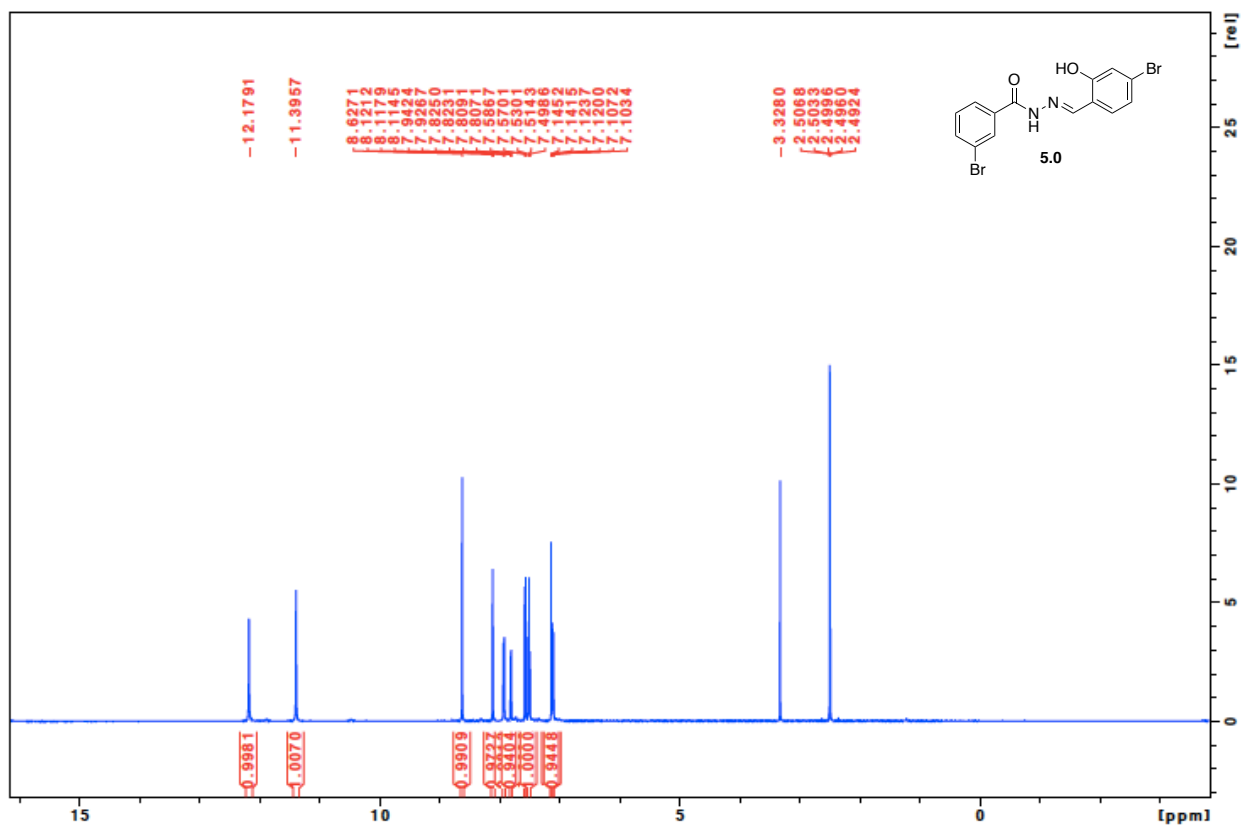

**<sup>1</sup>H NMR of compound 5.0**

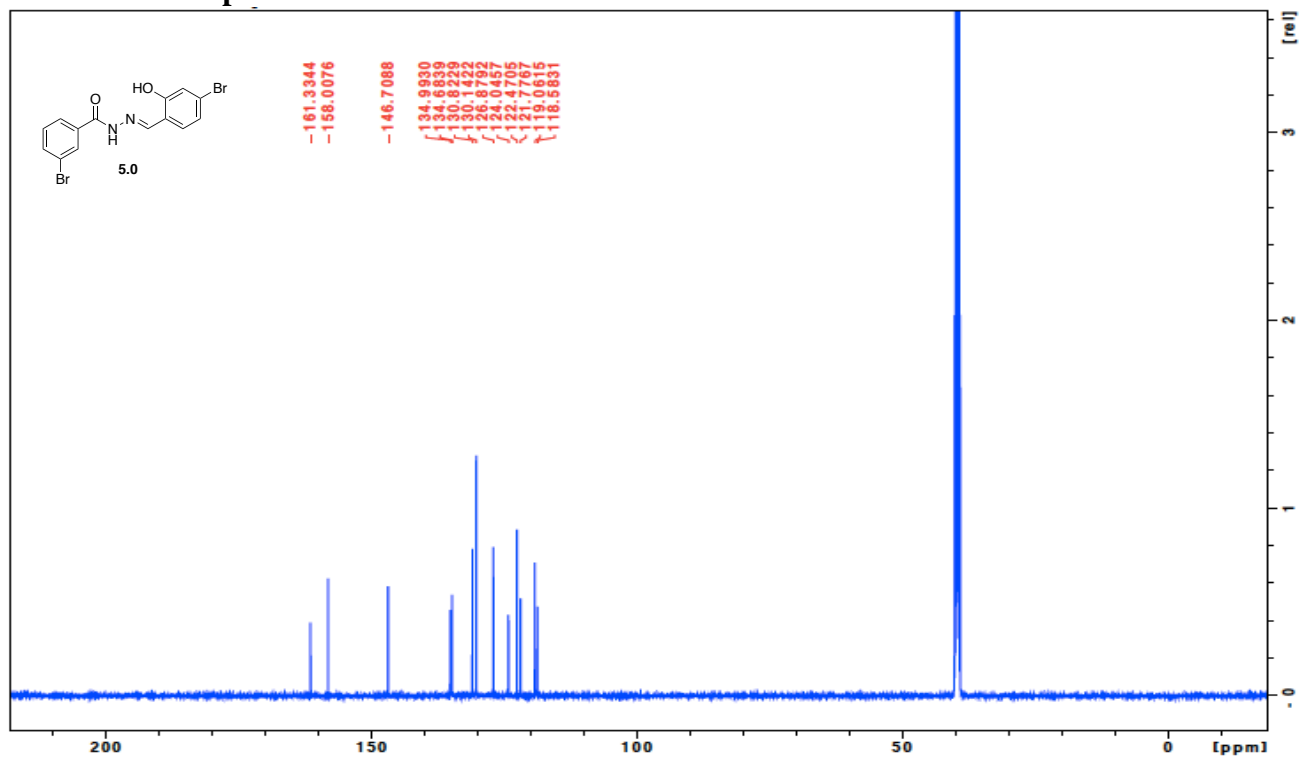

**<sup>13</sup>C NMR of compound 5.0**

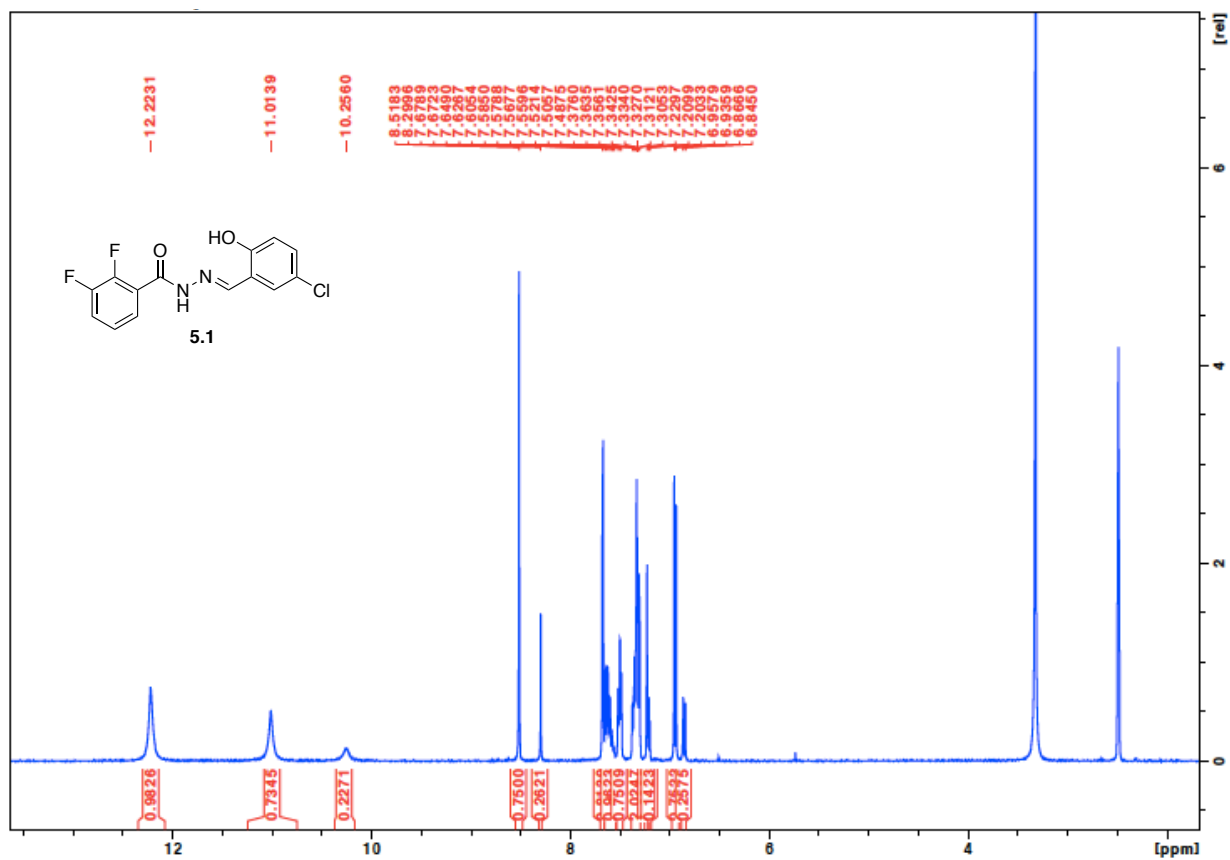

<sup>1</sup>H NMR of compound 5.1

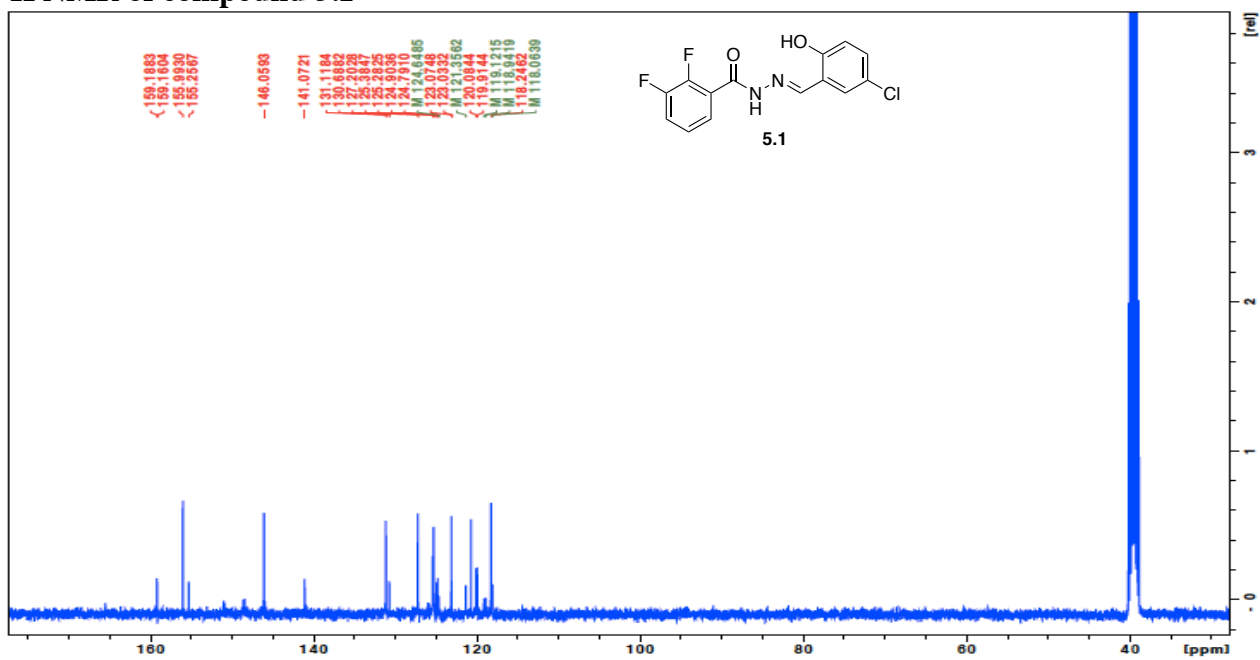

<sup>13</sup>C NMR of compound 5.1

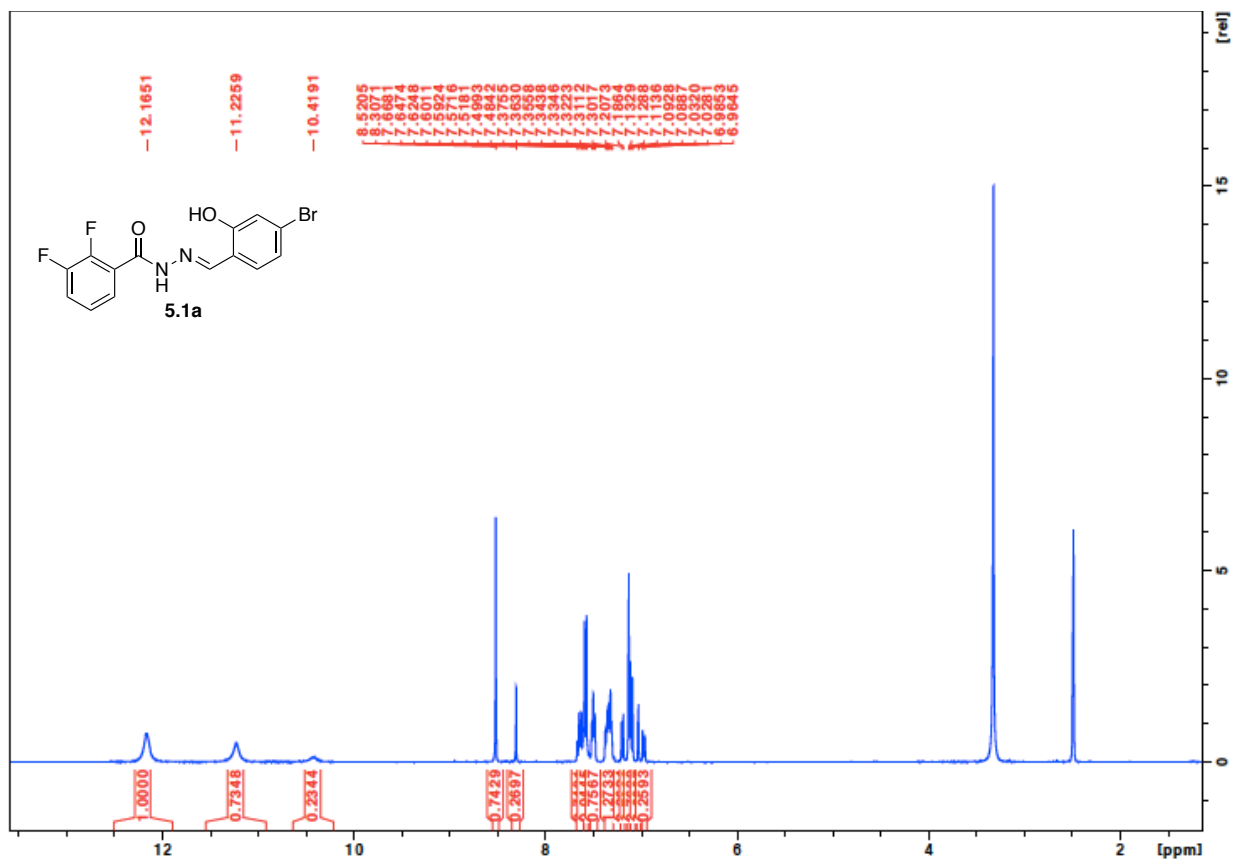

<sup>1</sup>H NMR of compound 5.1a

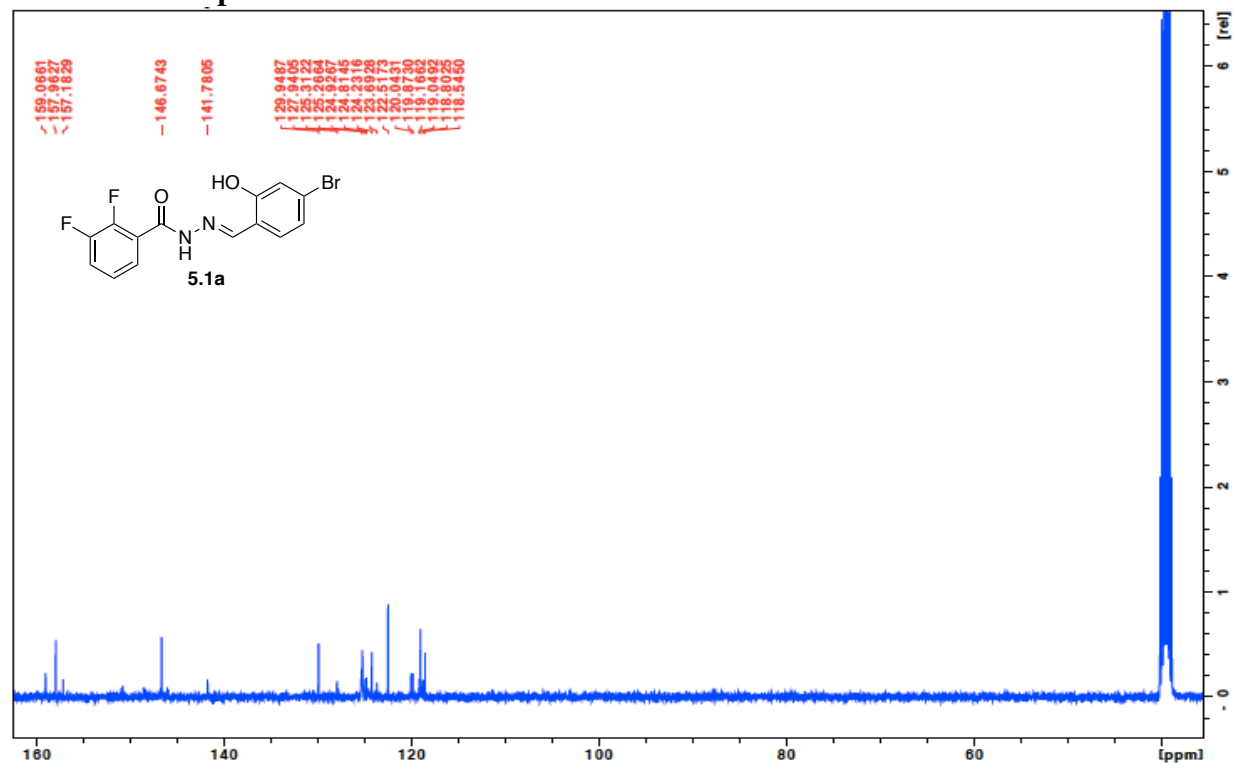

<sup>13</sup>C NMR of compound 5.1a

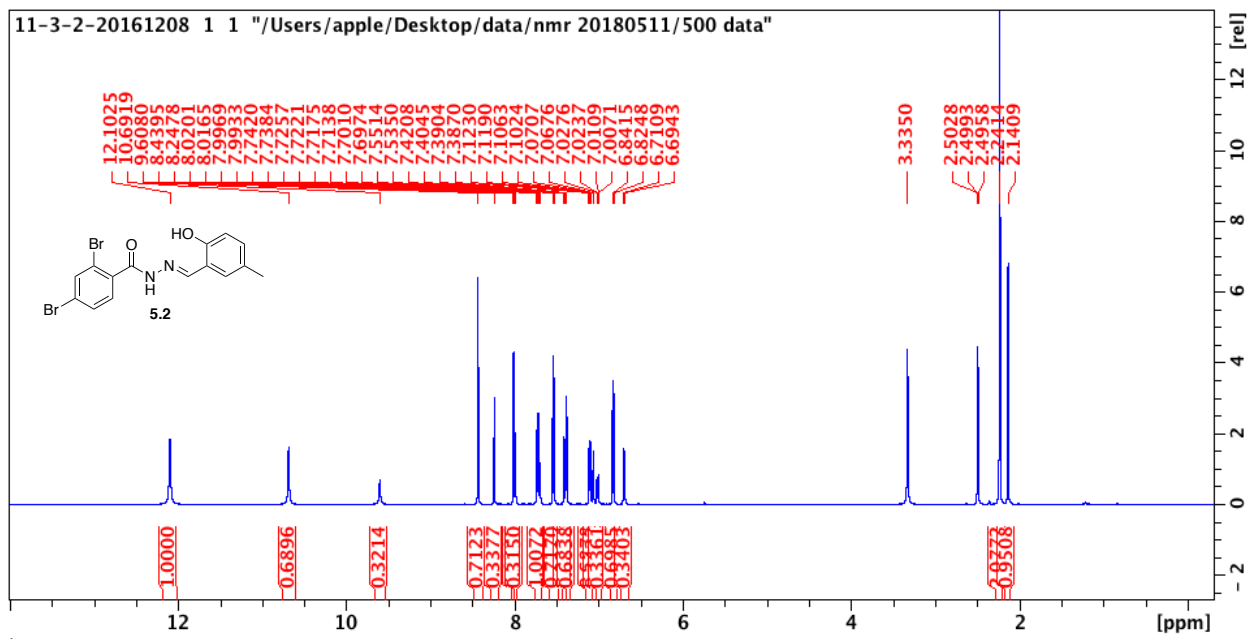

<sup>1</sup>H NMR of compound 5.2

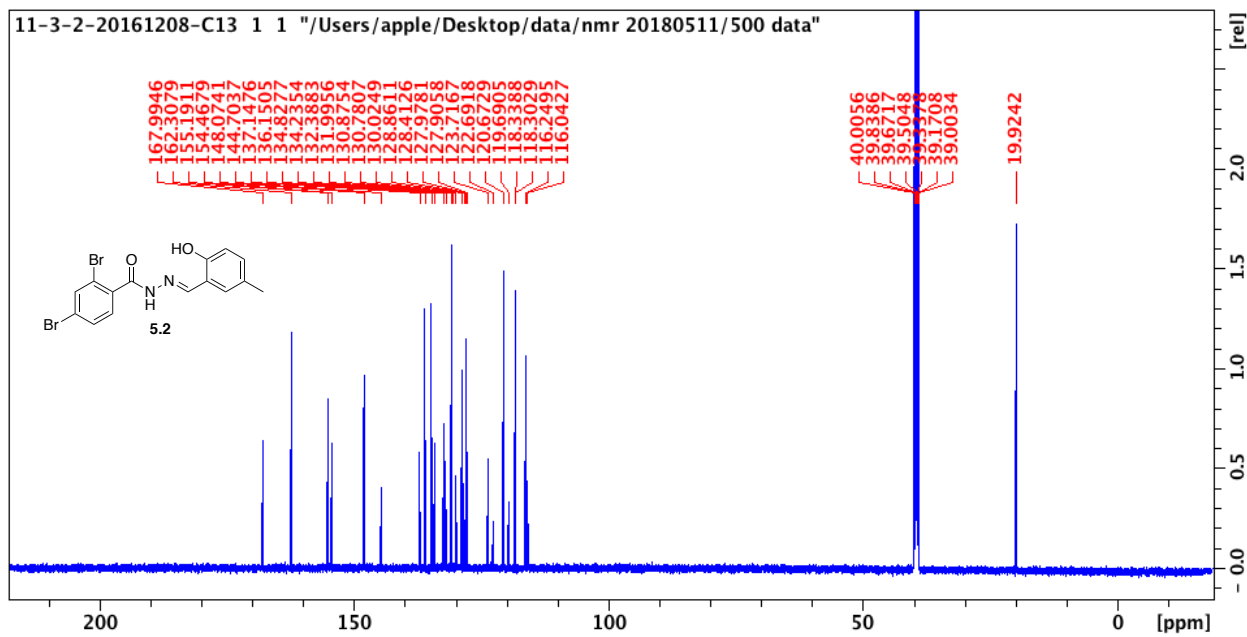

<sup>13</sup>C NMR of compound 5.2

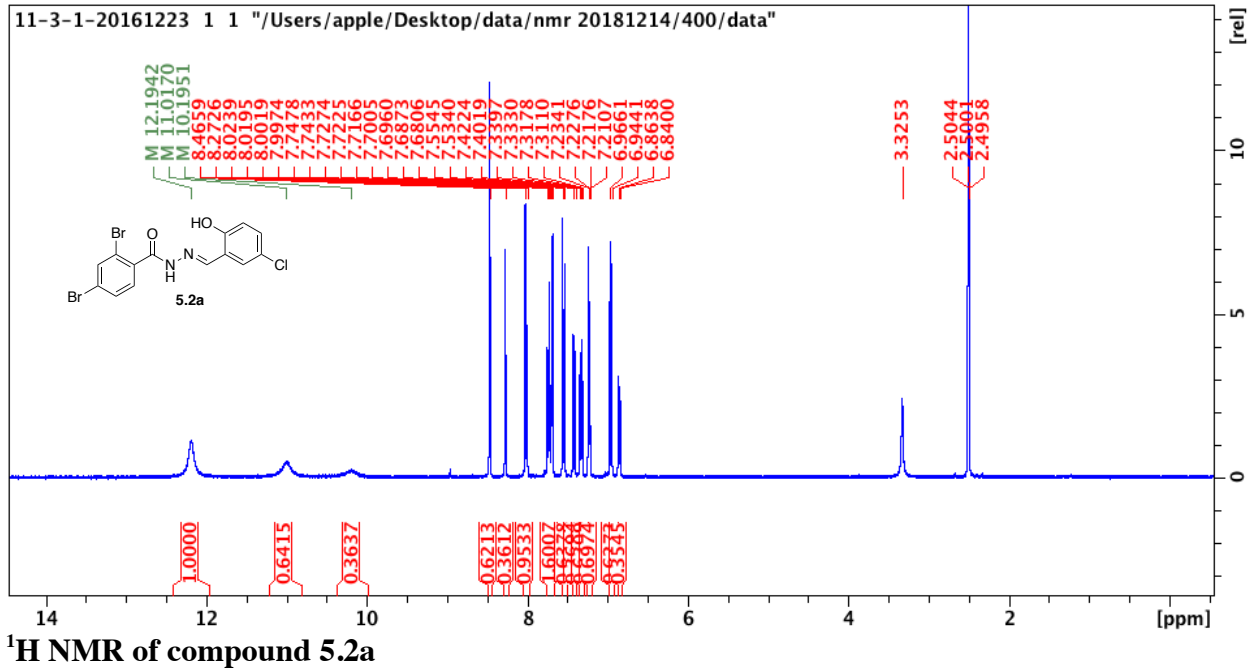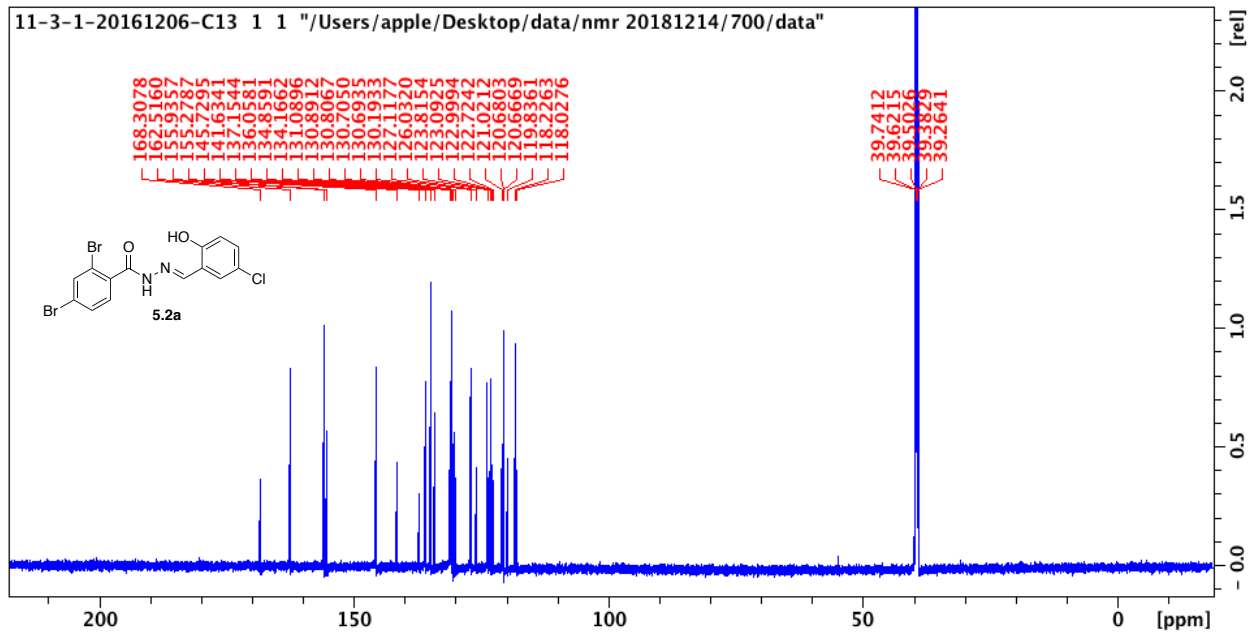

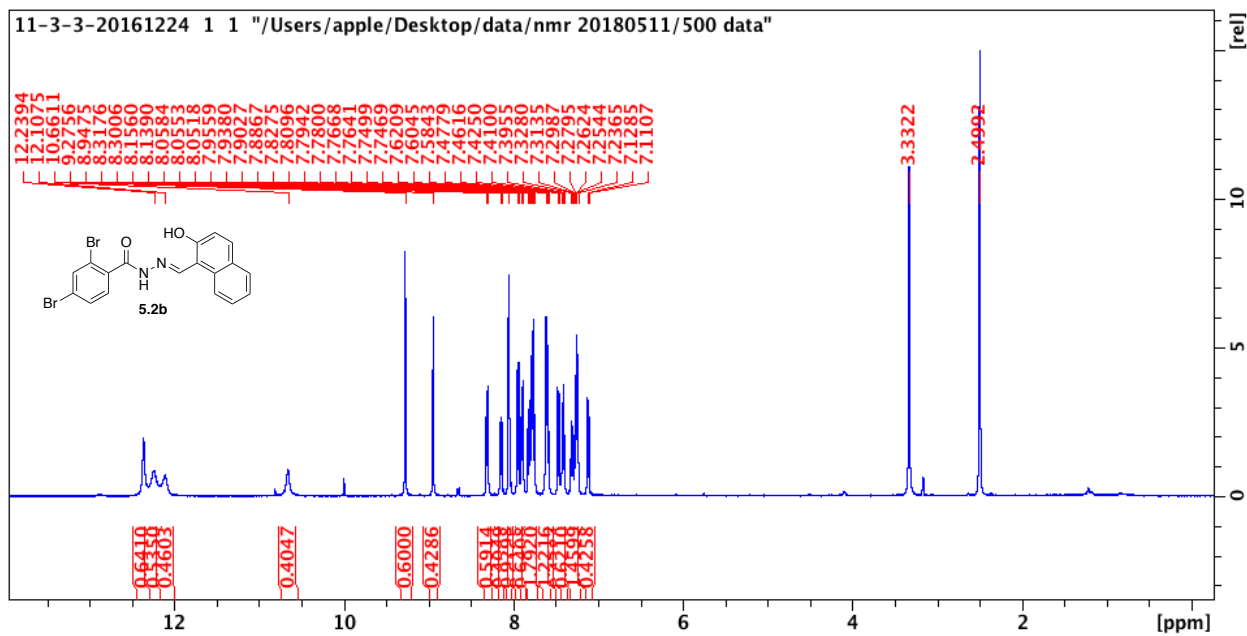

<sup>1</sup>H NMR of compound 5.2b

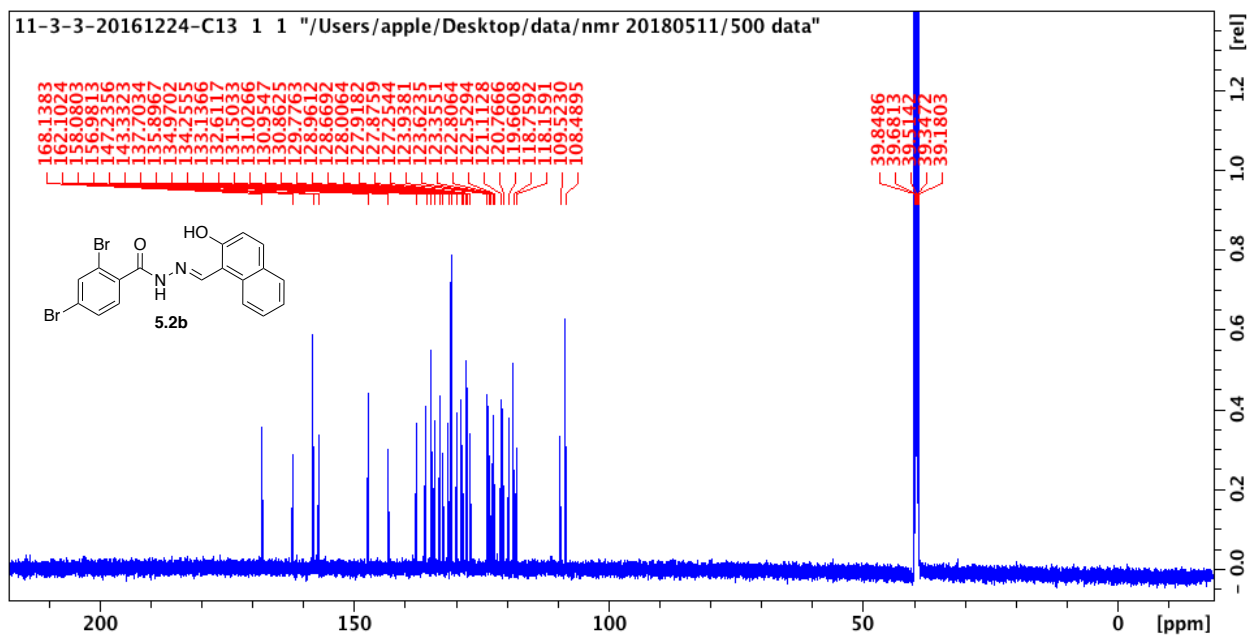

<sup>13</sup>C NMR of compound 5.2b

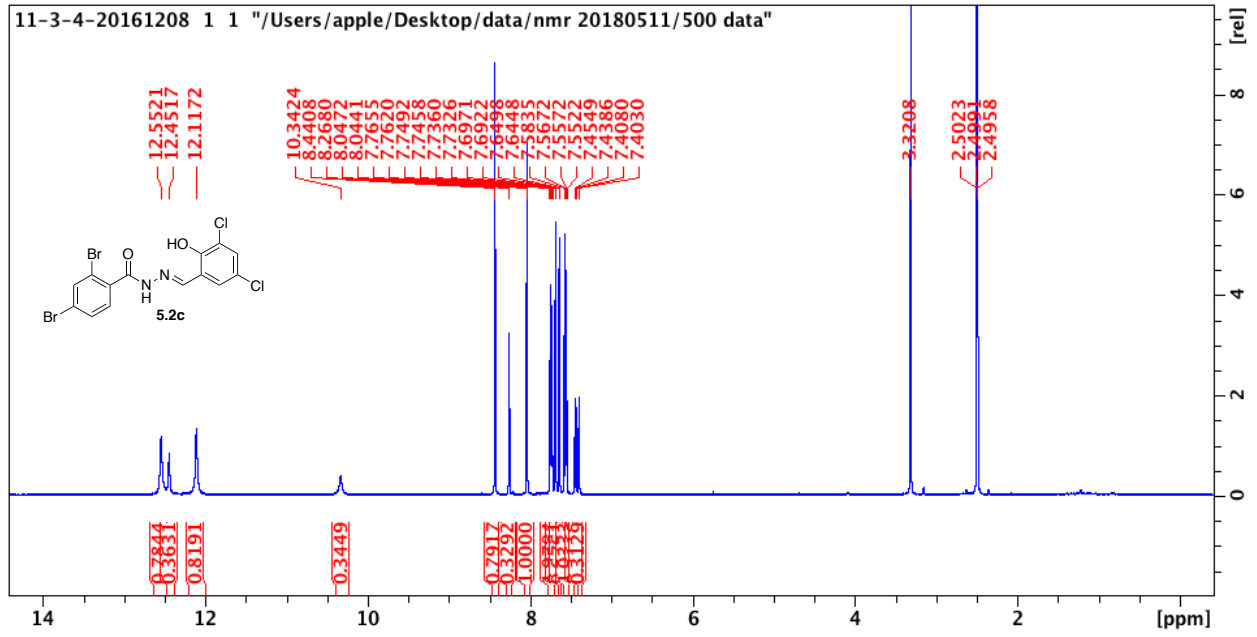

<sup>1</sup>H NMR of compound 5.2c

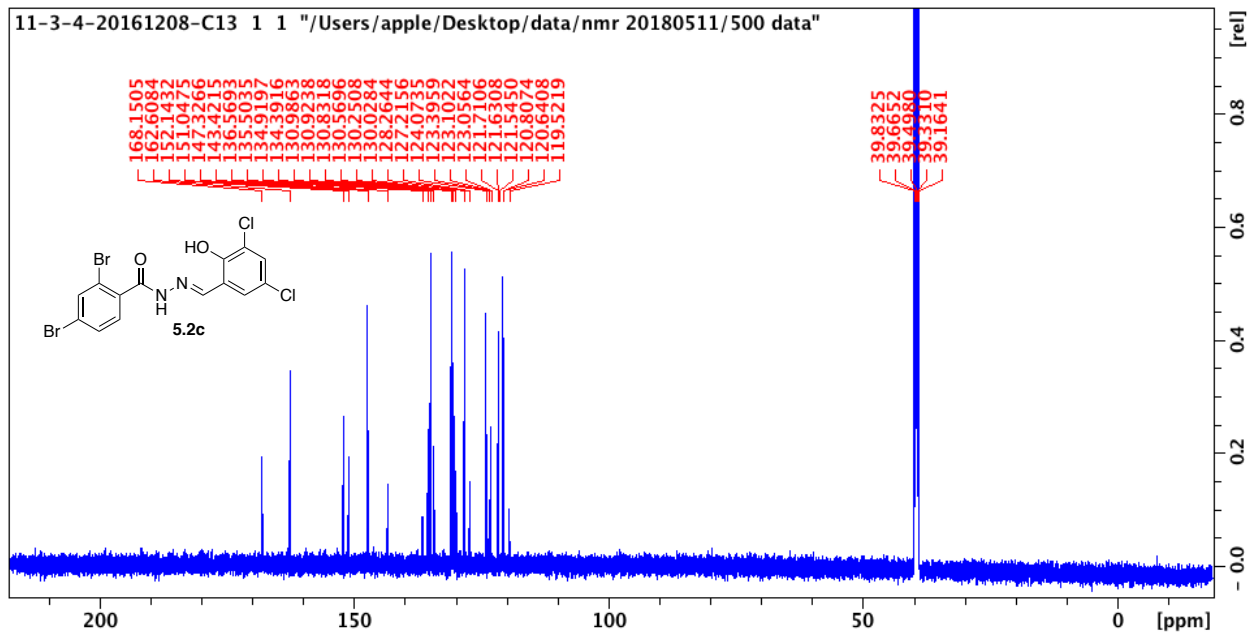

<sup>13</sup>C NMR of compound 5.2c



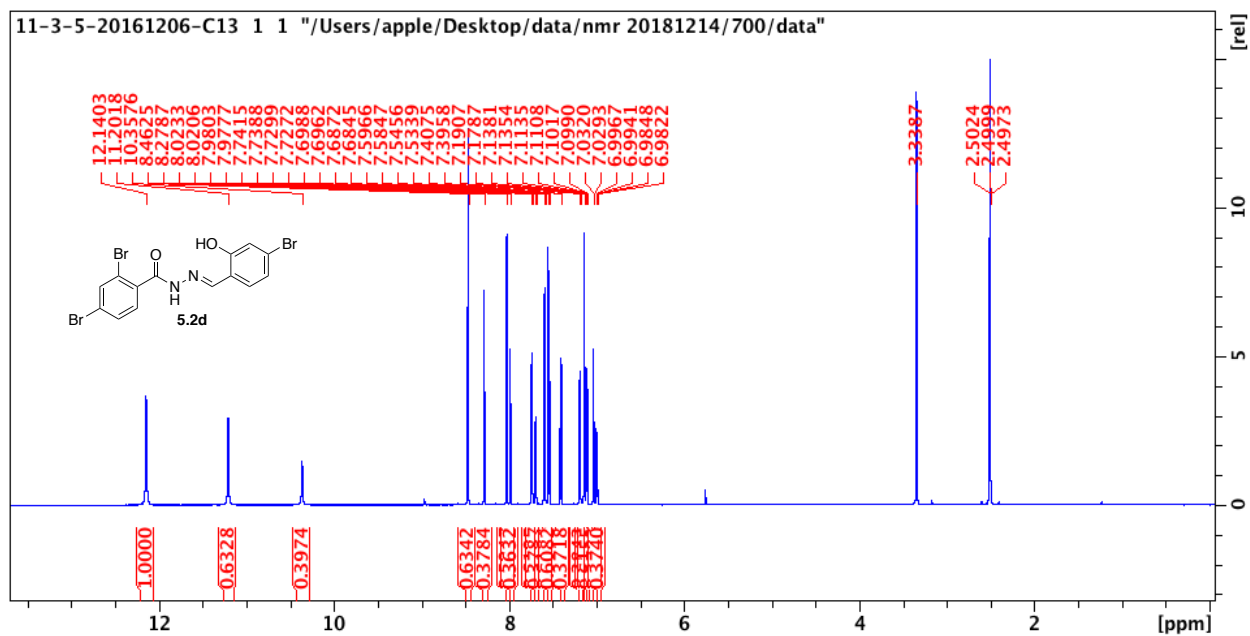

<sup>1</sup>H NMR of compound 5.2d

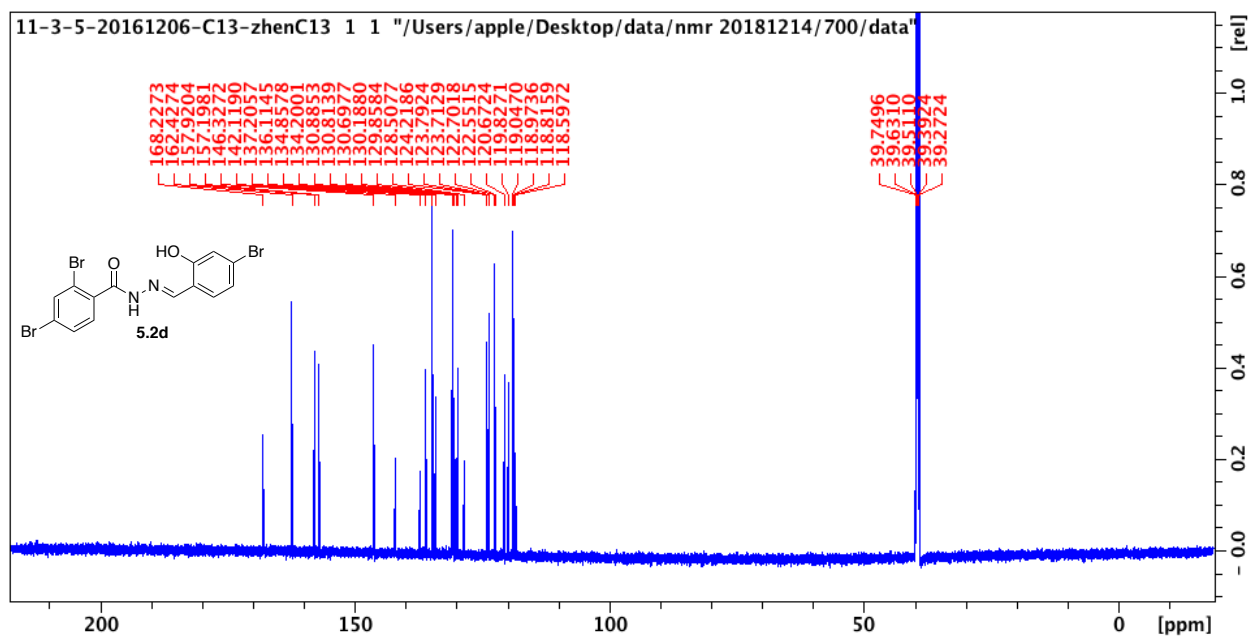

<sup>13</sup>C NMR of compound 5.2d

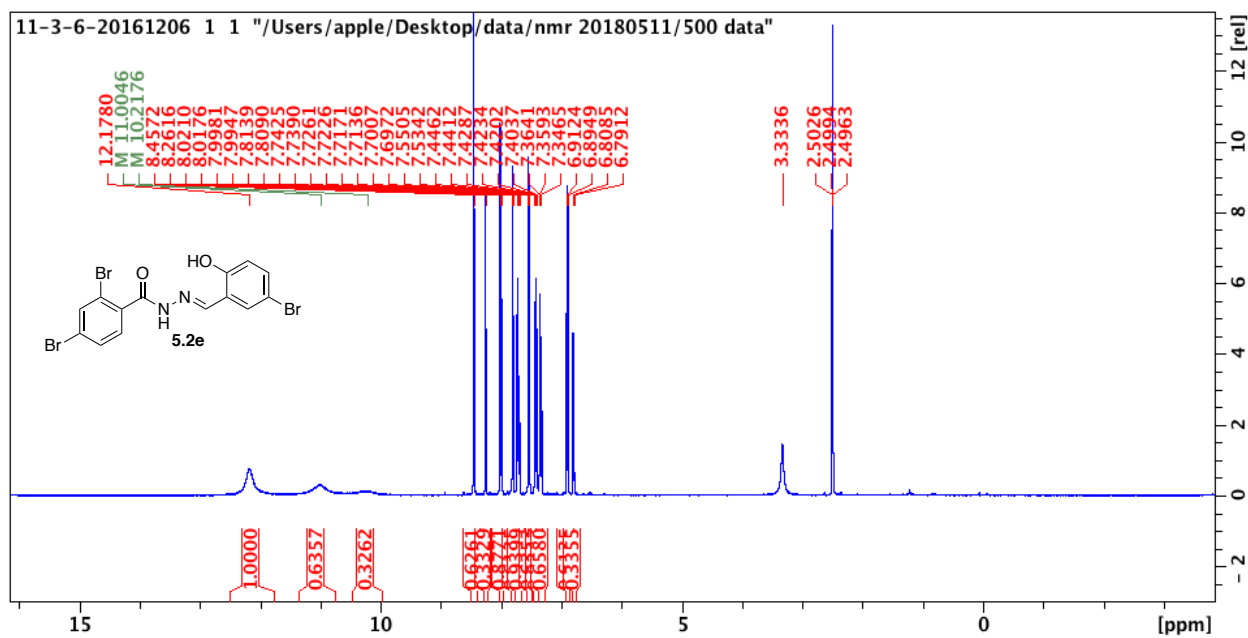

<sup>1</sup>H NMR of compound 5.2e

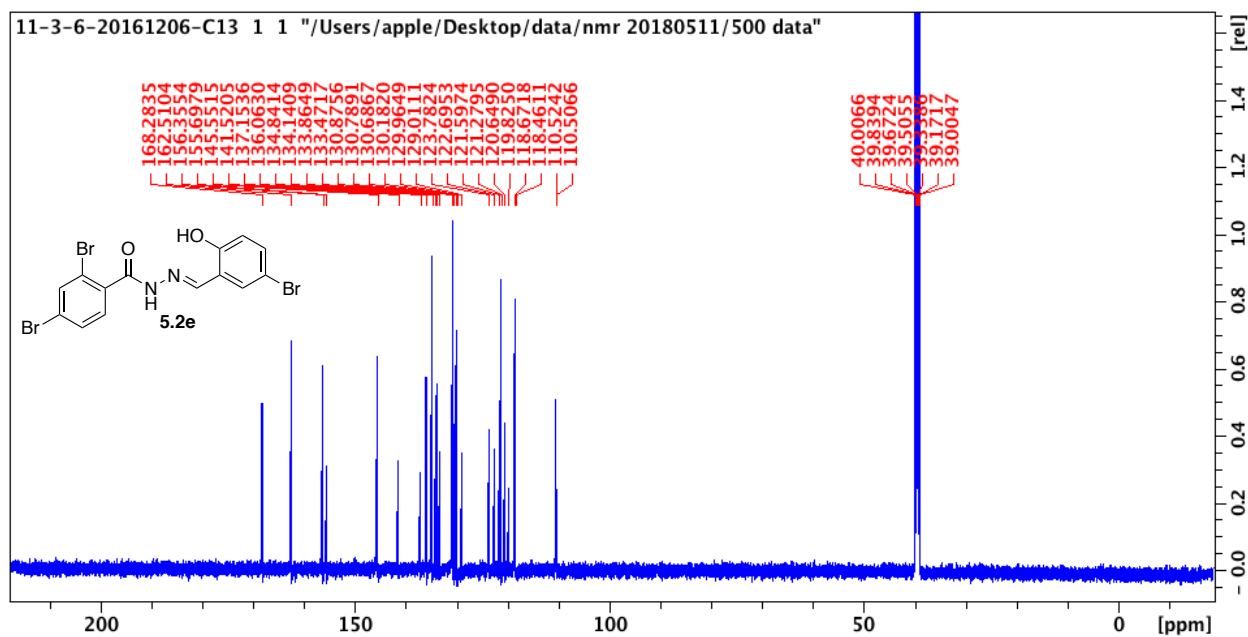

<sup>13</sup>C NMR of compound 5.2e

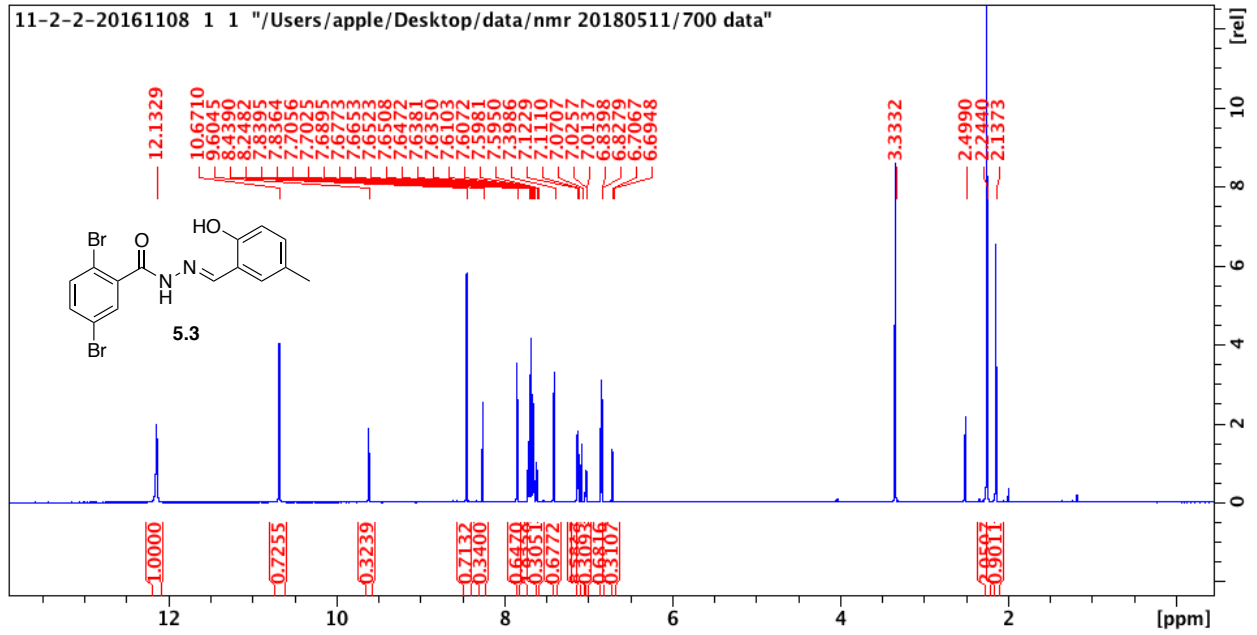

**<sup>1</sup>H NMR of compound 5.3**

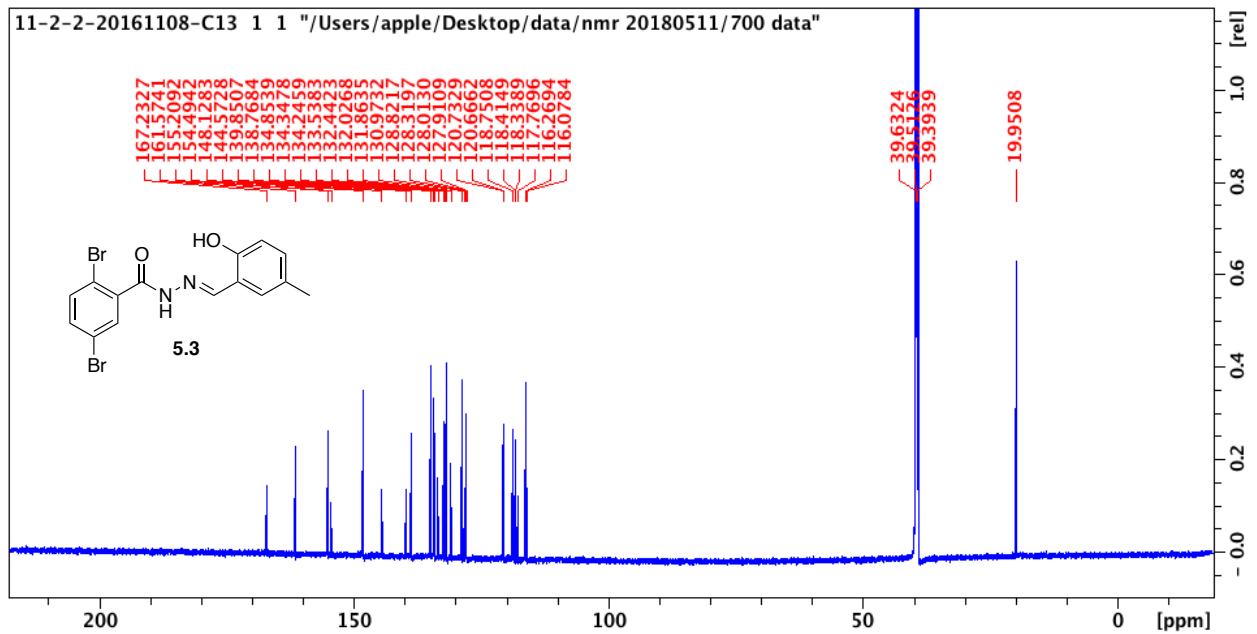

**<sup>13</sup>C NMR of compound 5.3**

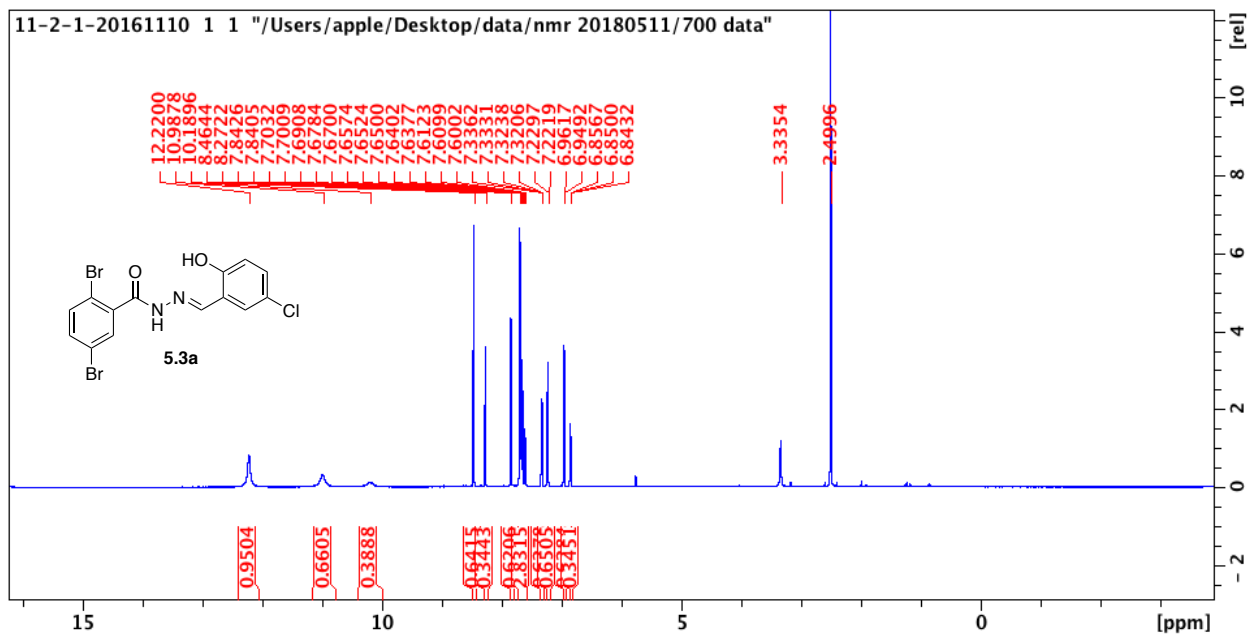

**<sup>1</sup>H NMR of compound 5.3a**

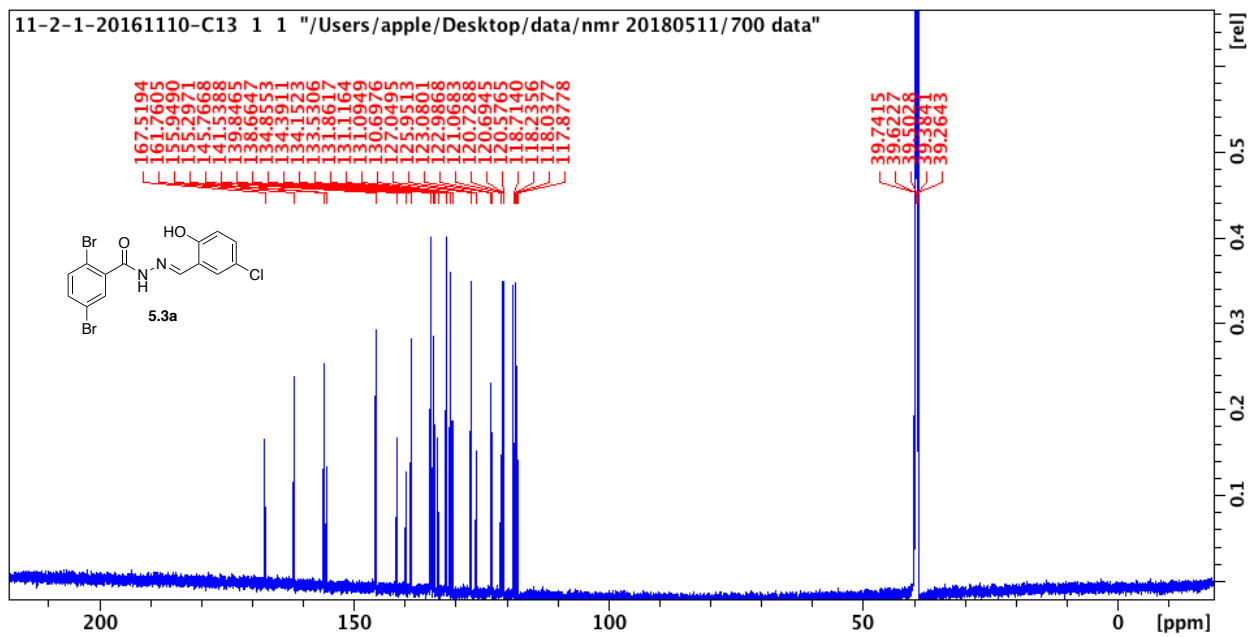

**<sup>13</sup>C NMR of compound 5.3a**

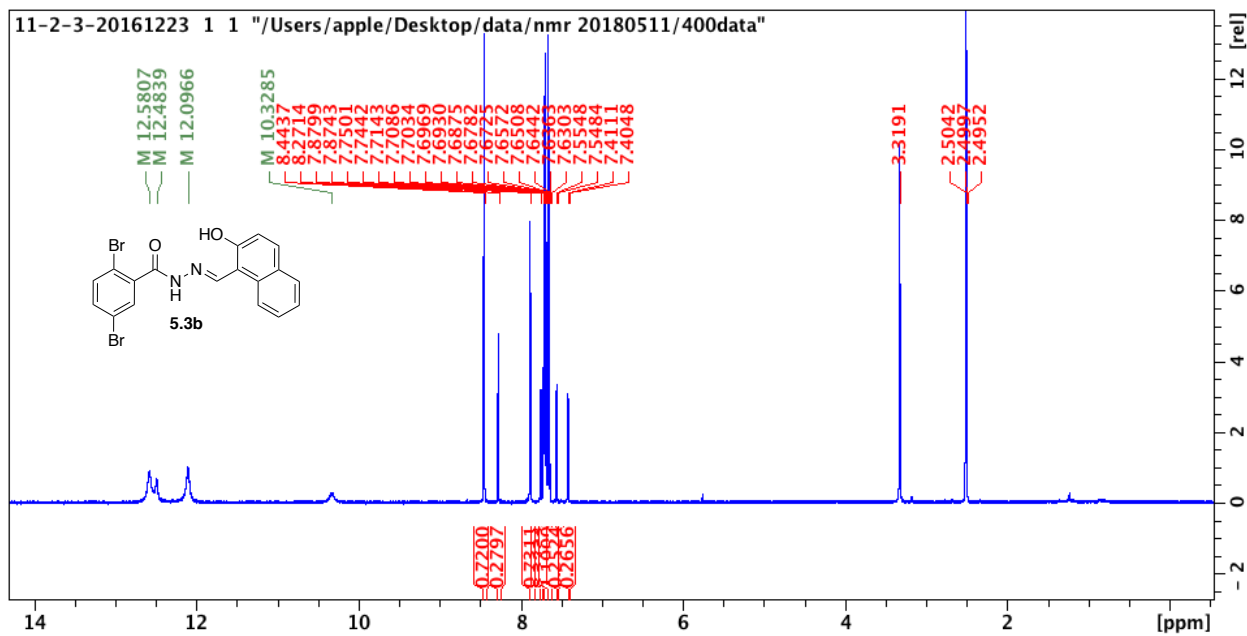

<sup>1</sup>H NMR of compound 5.3b

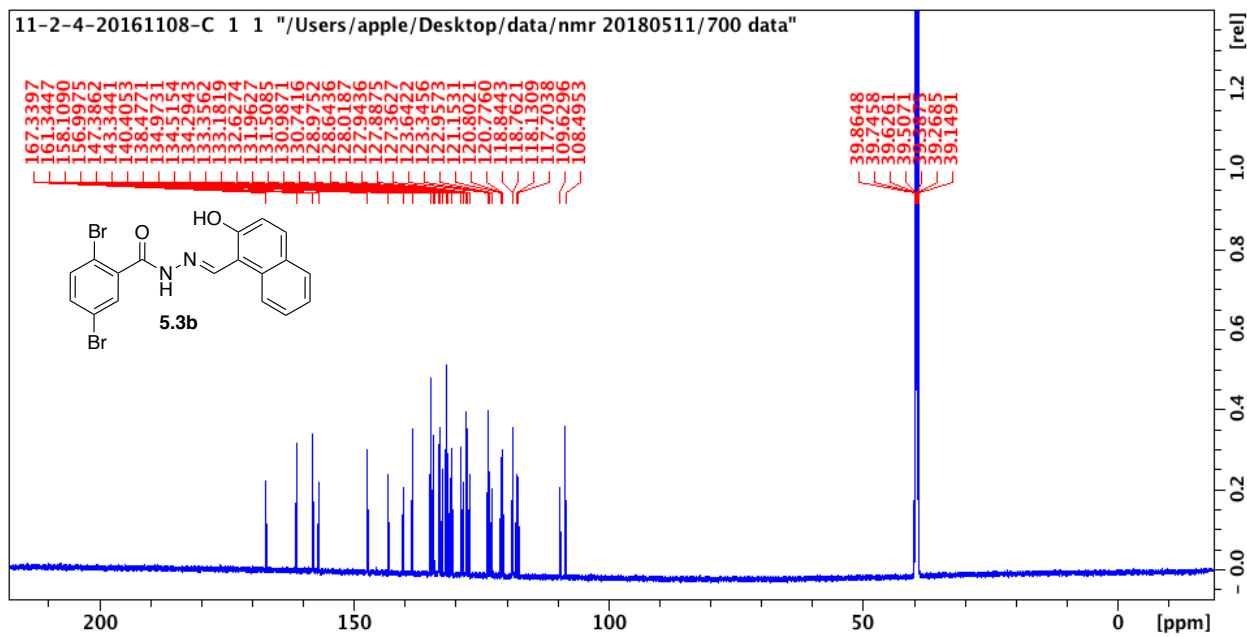

<sup>13</sup>C NMR of compound 5.3b

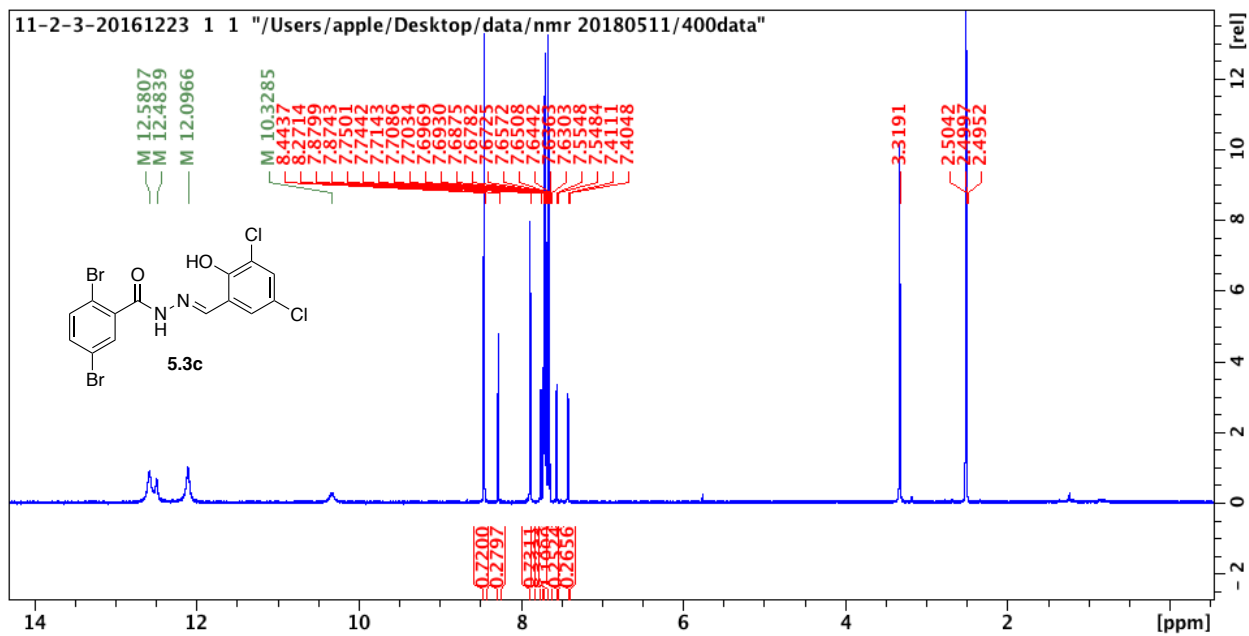

<sup>1</sup>H NMR of compound 5.3c

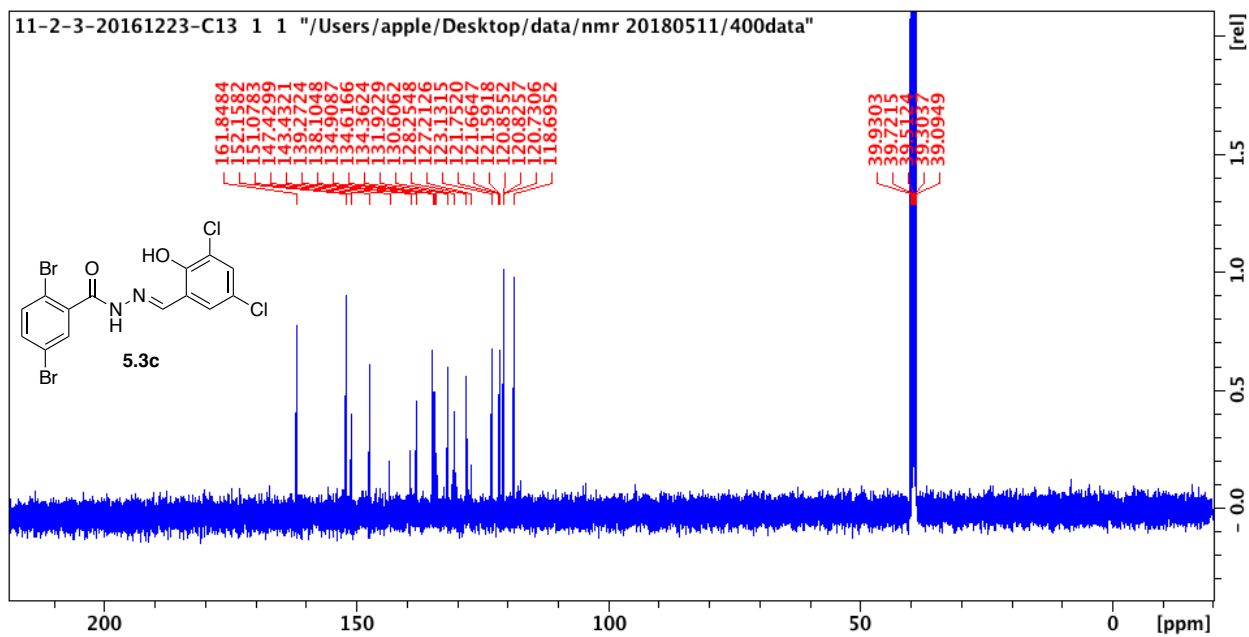

<sup>13</sup>C NMR of compound 5.3c

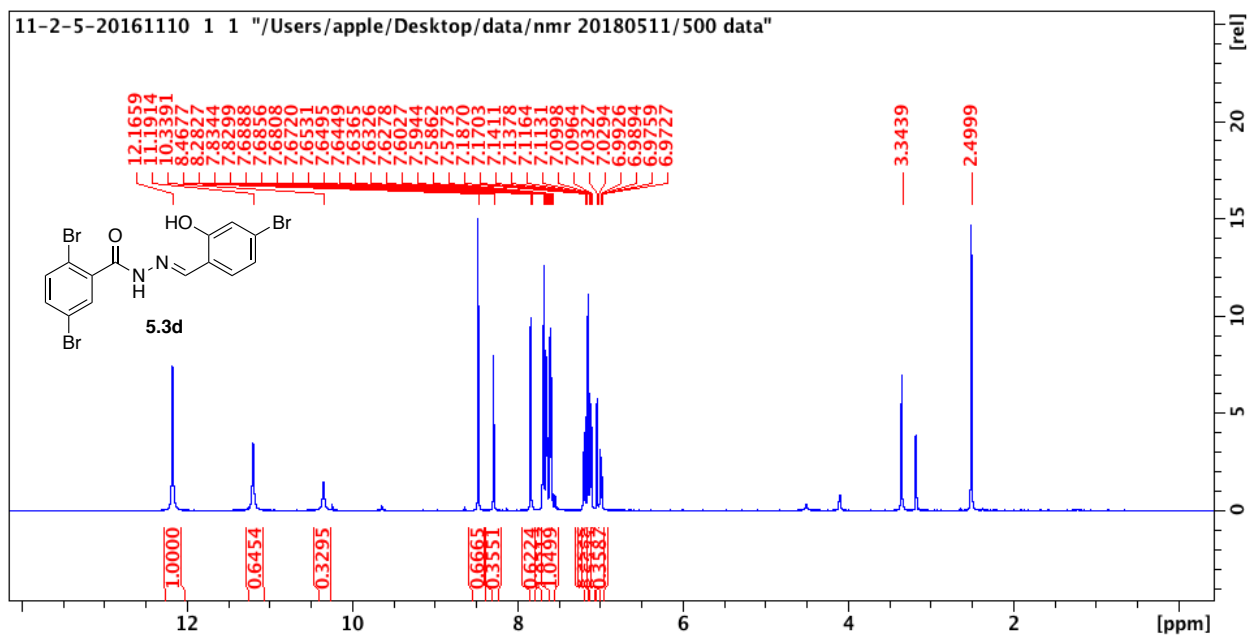

<sup>1</sup>H NMR of compound 5.3d

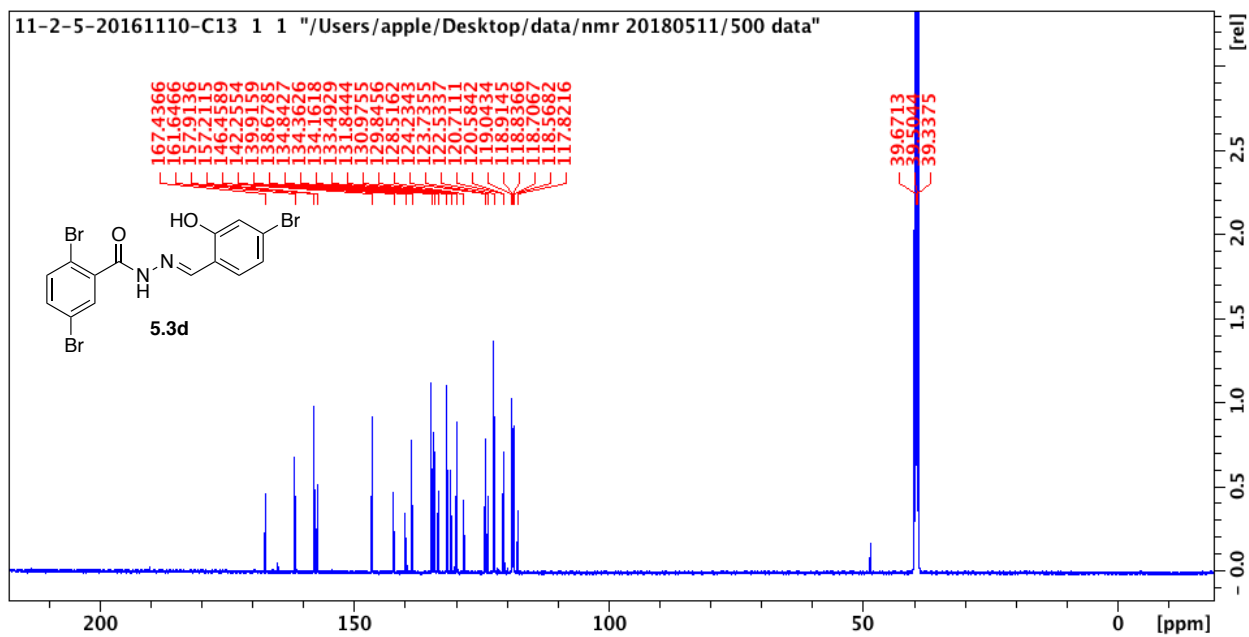

<sup>13</sup>C NMR of compound 5.3d

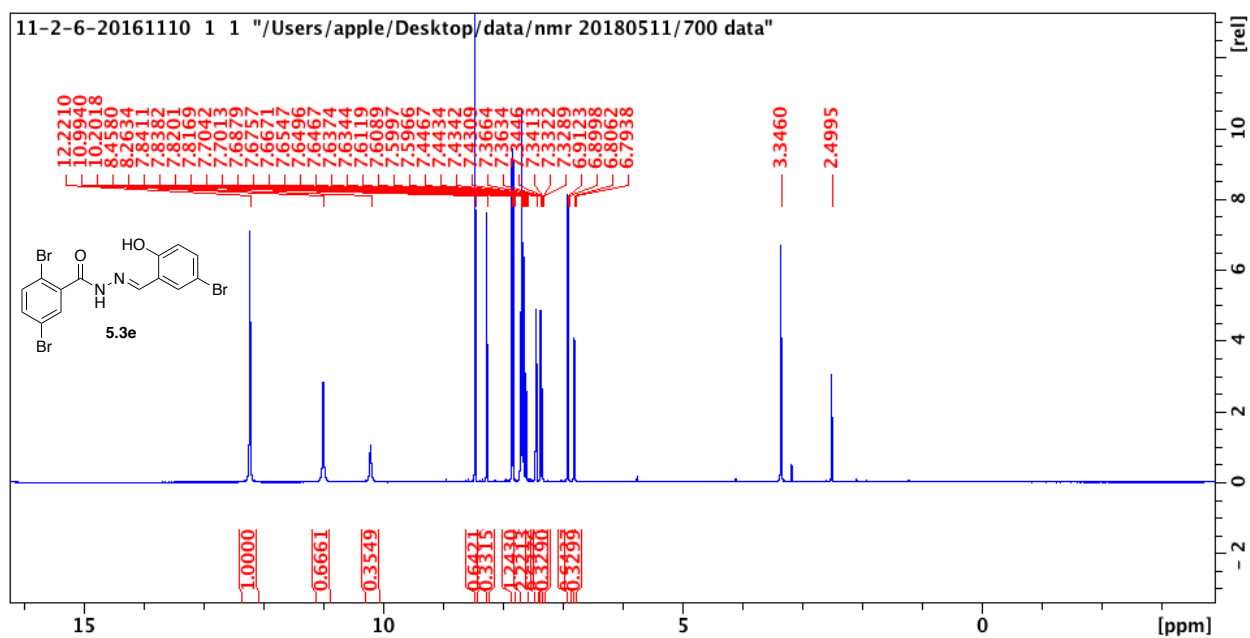

<sup>1</sup>H NMR of compound 5.3e

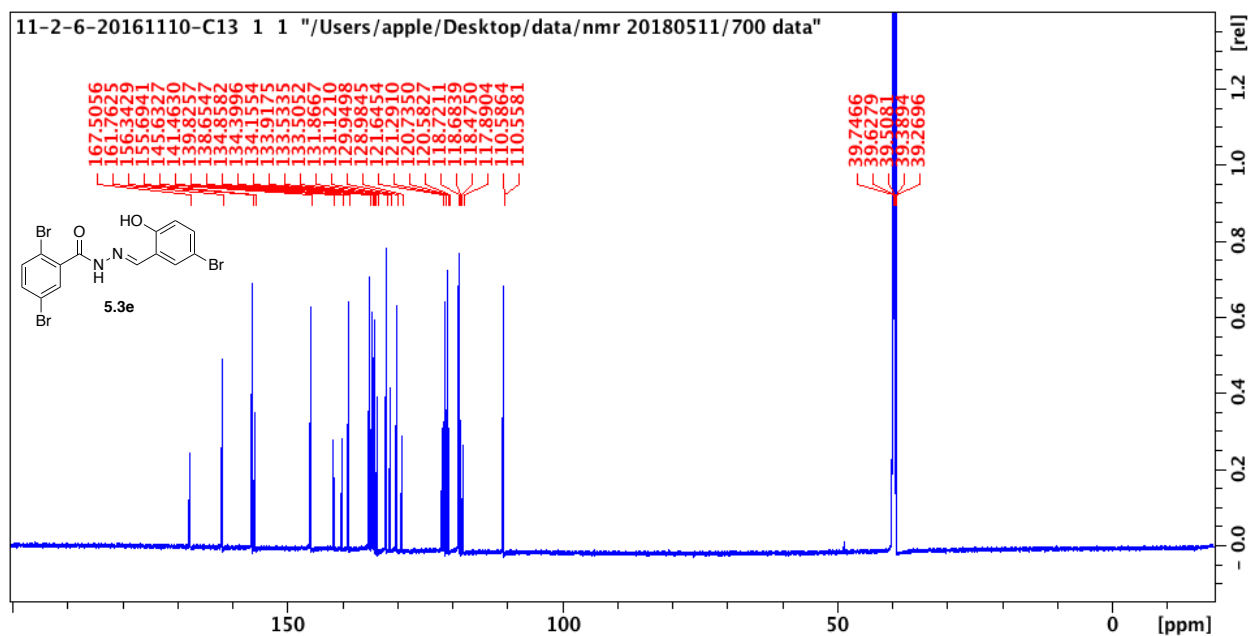

<sup>13</sup>C NMR of compound 5.3e



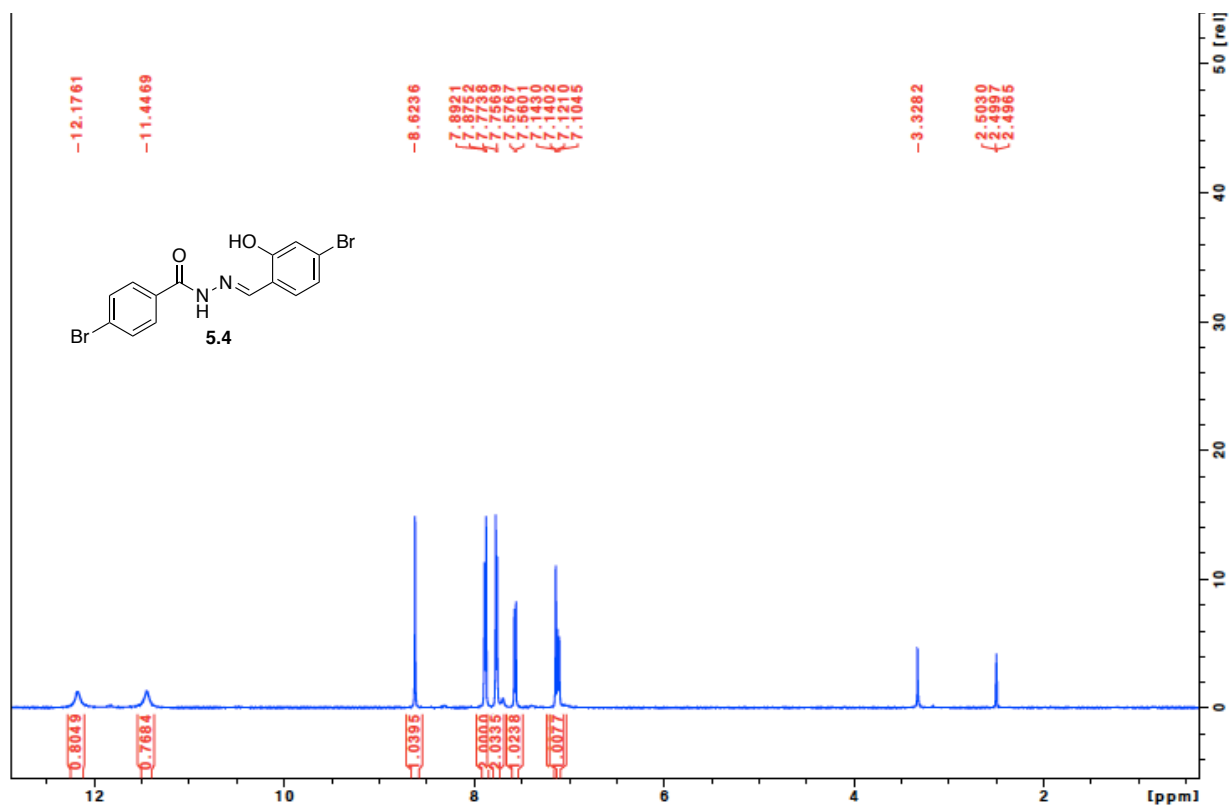

**<sup>1</sup>H NMR of compound 5.4**

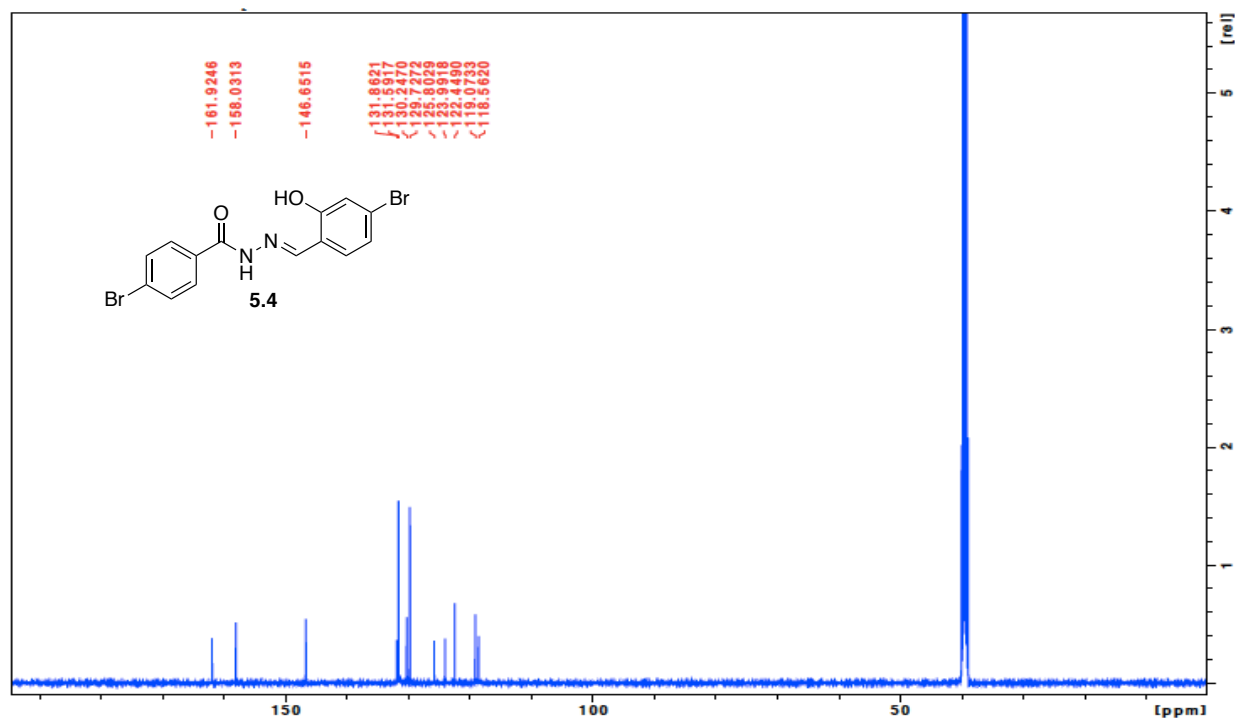

**<sup>13</sup>C NMR of compound 5.4**

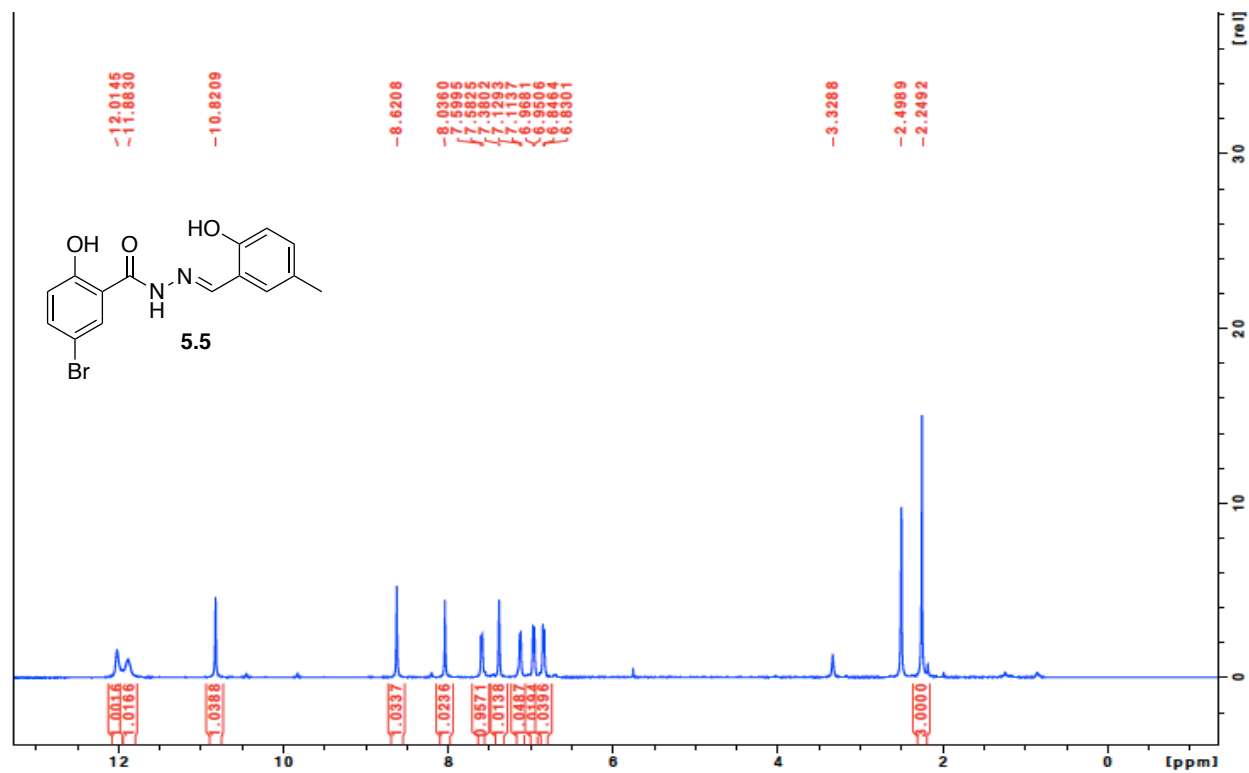

**<sup>1</sup>H NMR of compound 5.5**

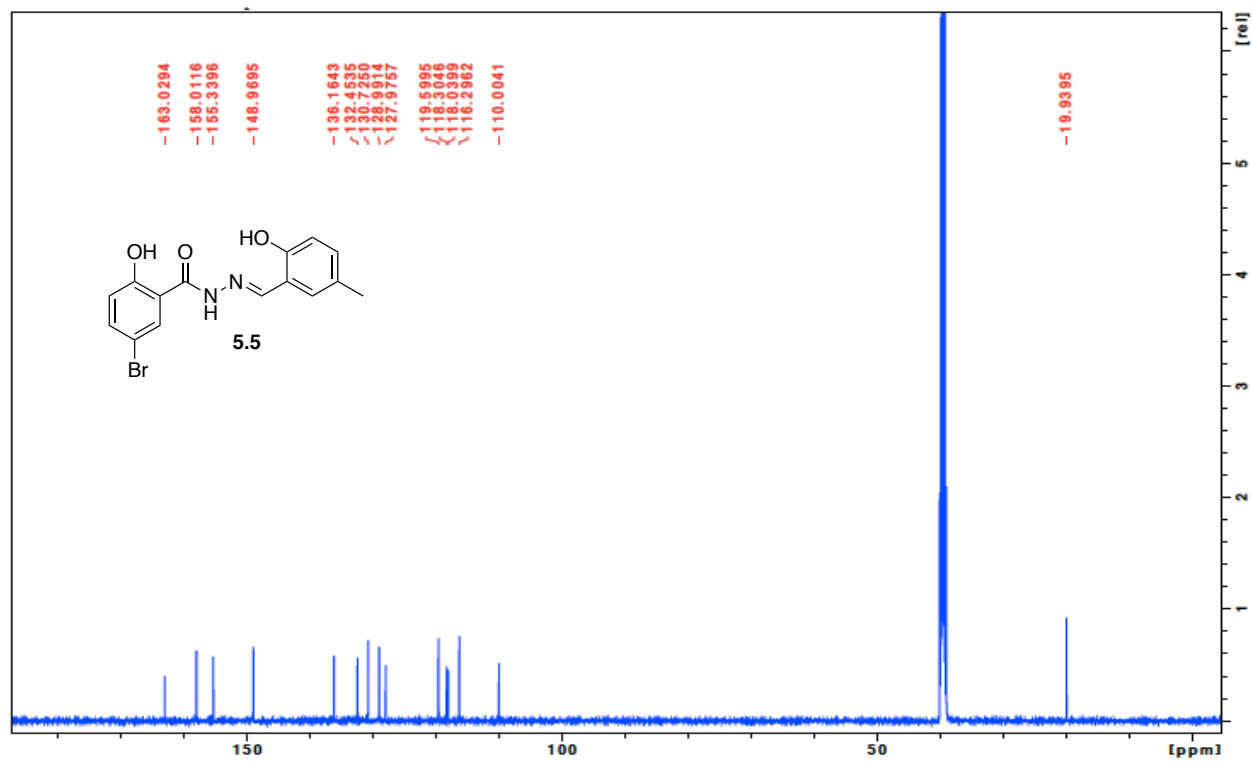

**<sup>13</sup>C NMR of compound 5.5**

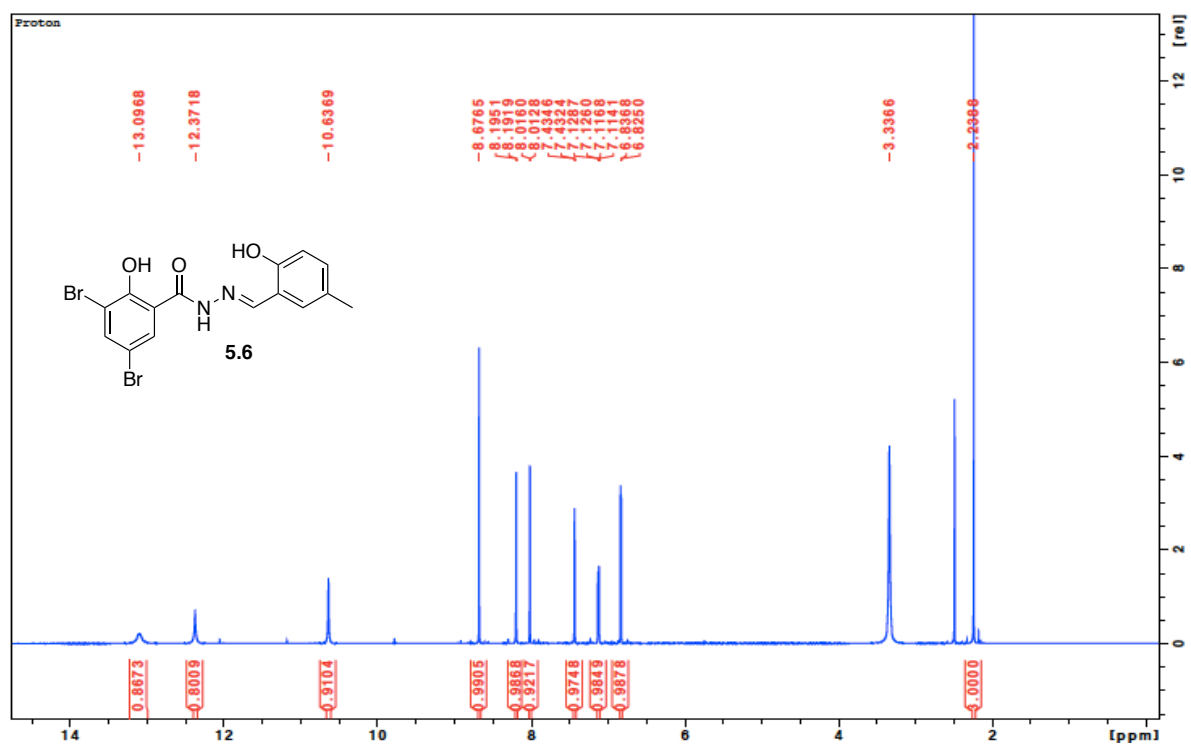

<sup>1</sup>H NMR of compound 5.6

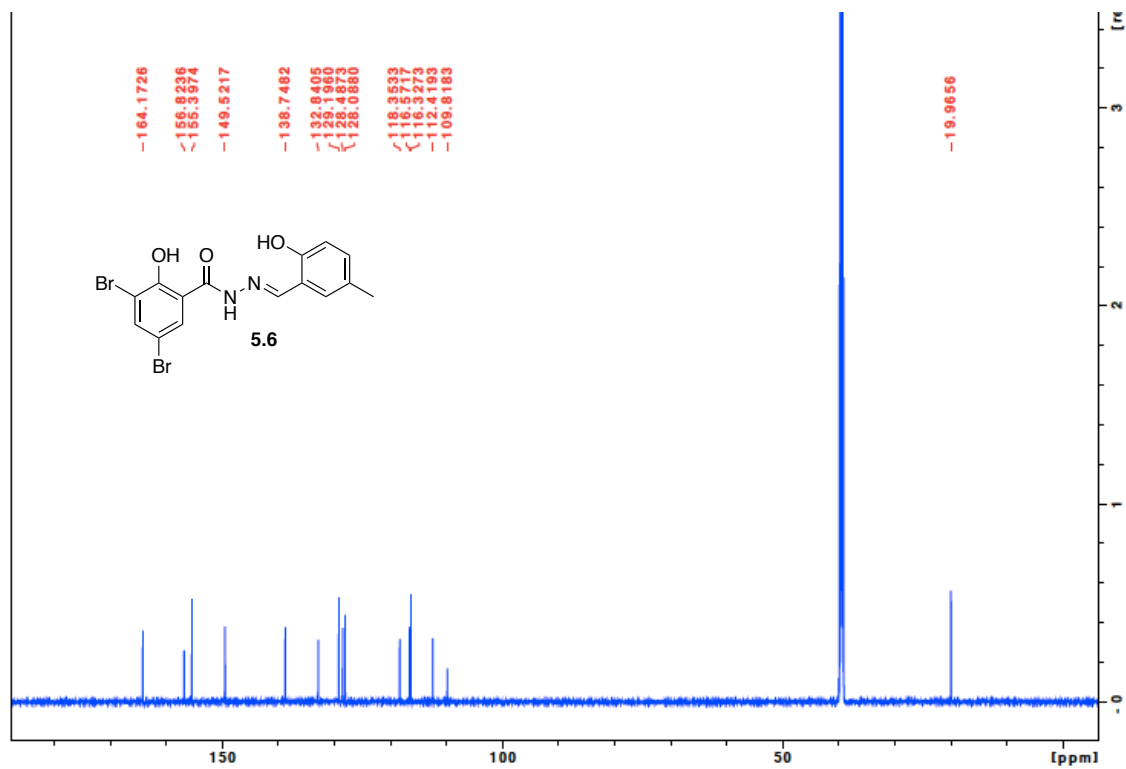

<sup>13</sup>C NMR of compound 5.6

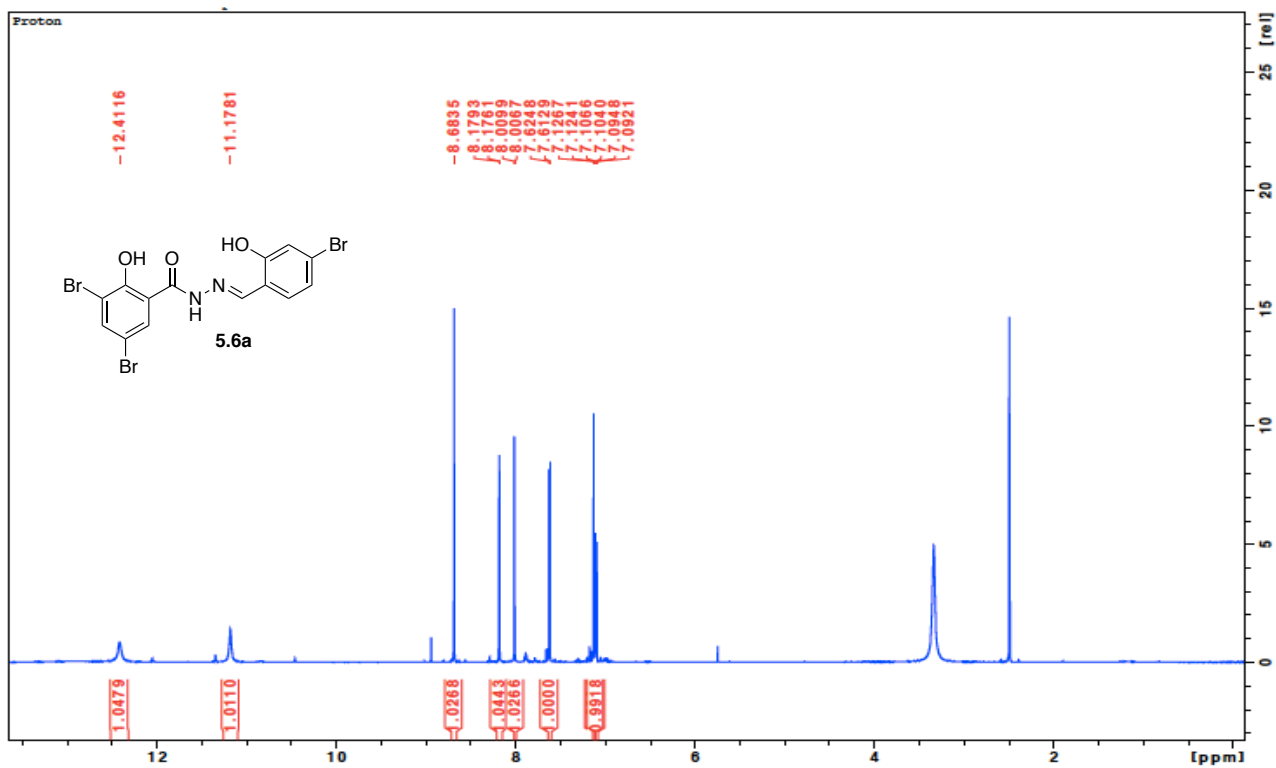

**<sup>1</sup>H NMR of compound 5.6a**

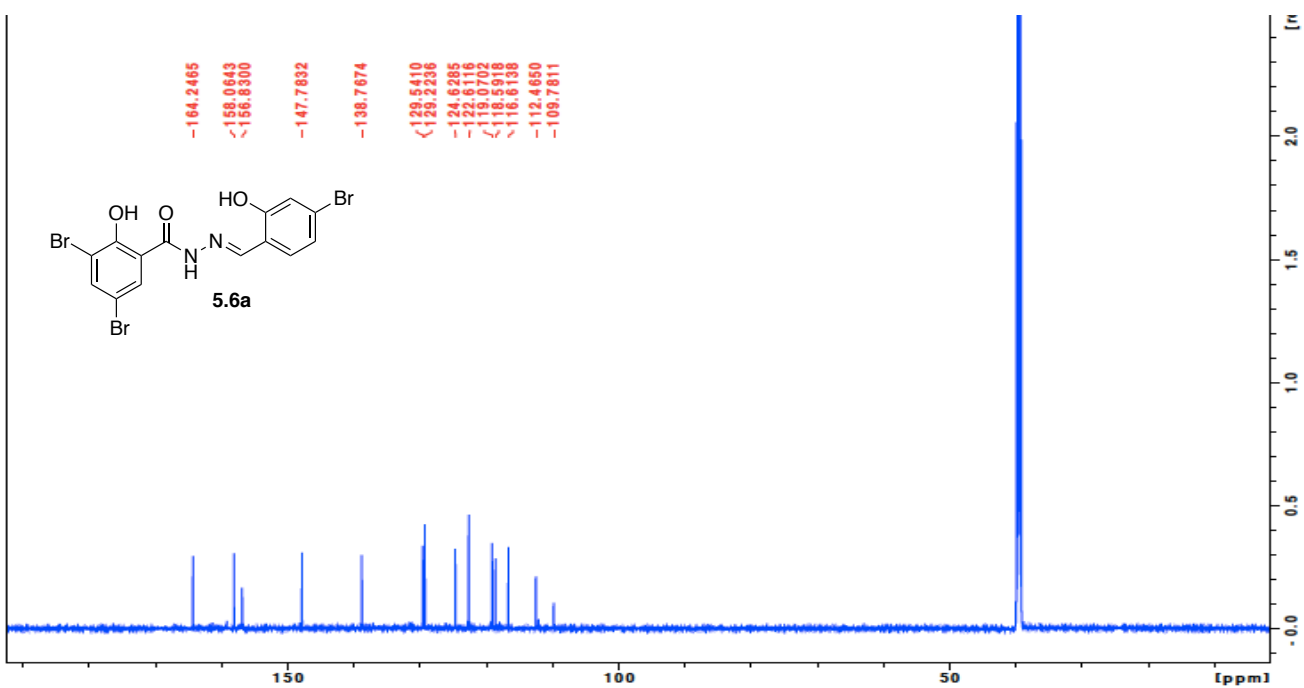

**<sup>13</sup>C NMR of compound 5.6a**

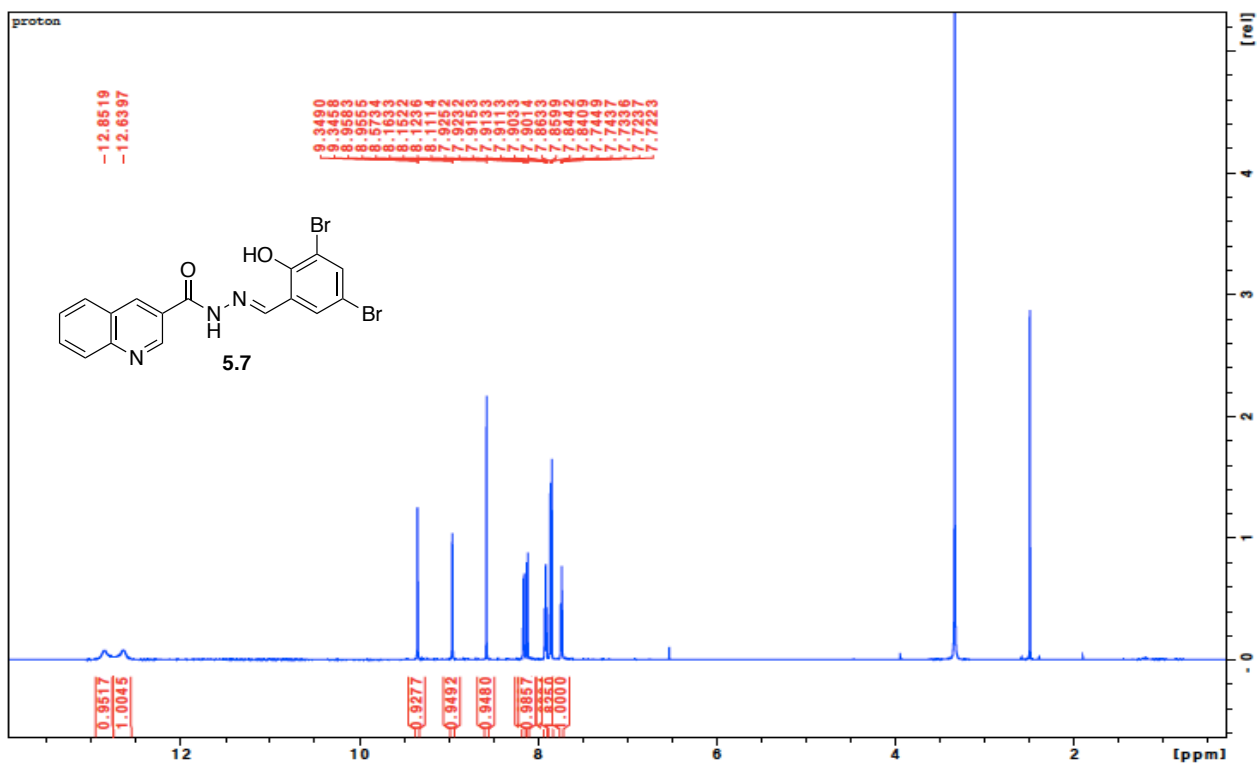

<sup>1</sup>H NMR of compound 5.7

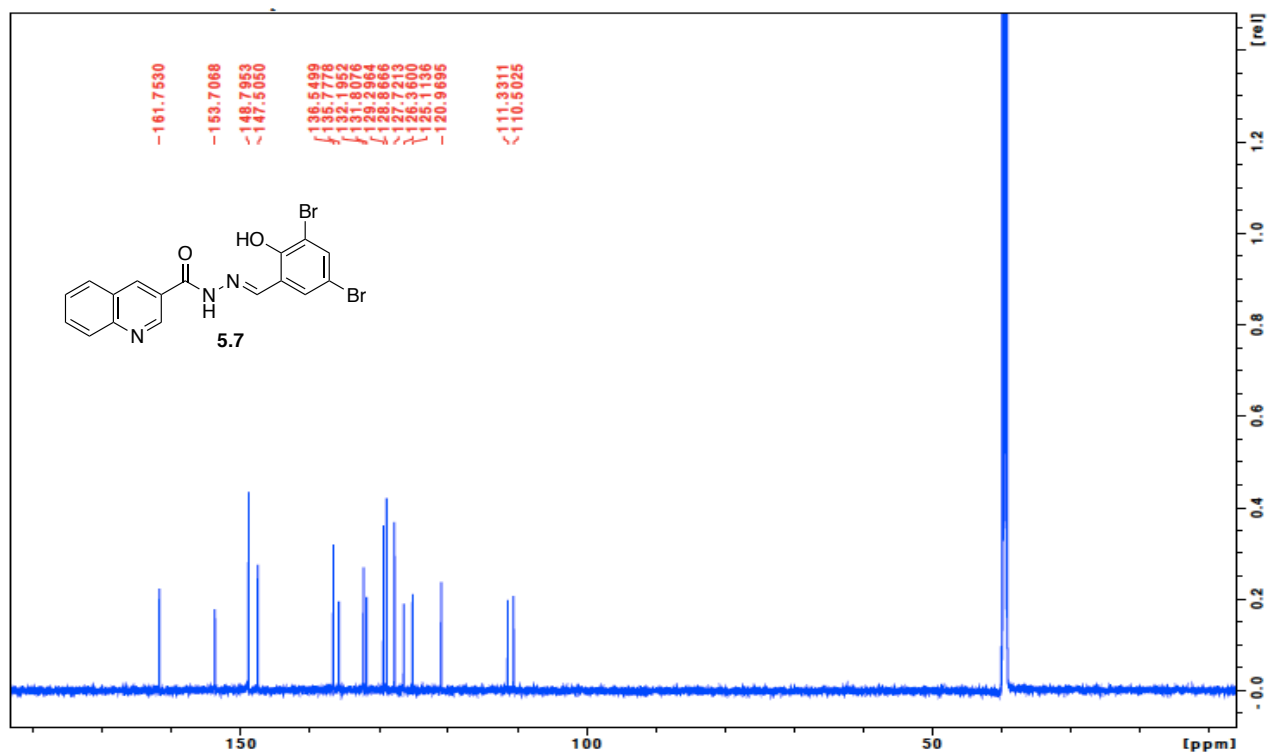

<sup>13</sup>C NMR of compound 5.7

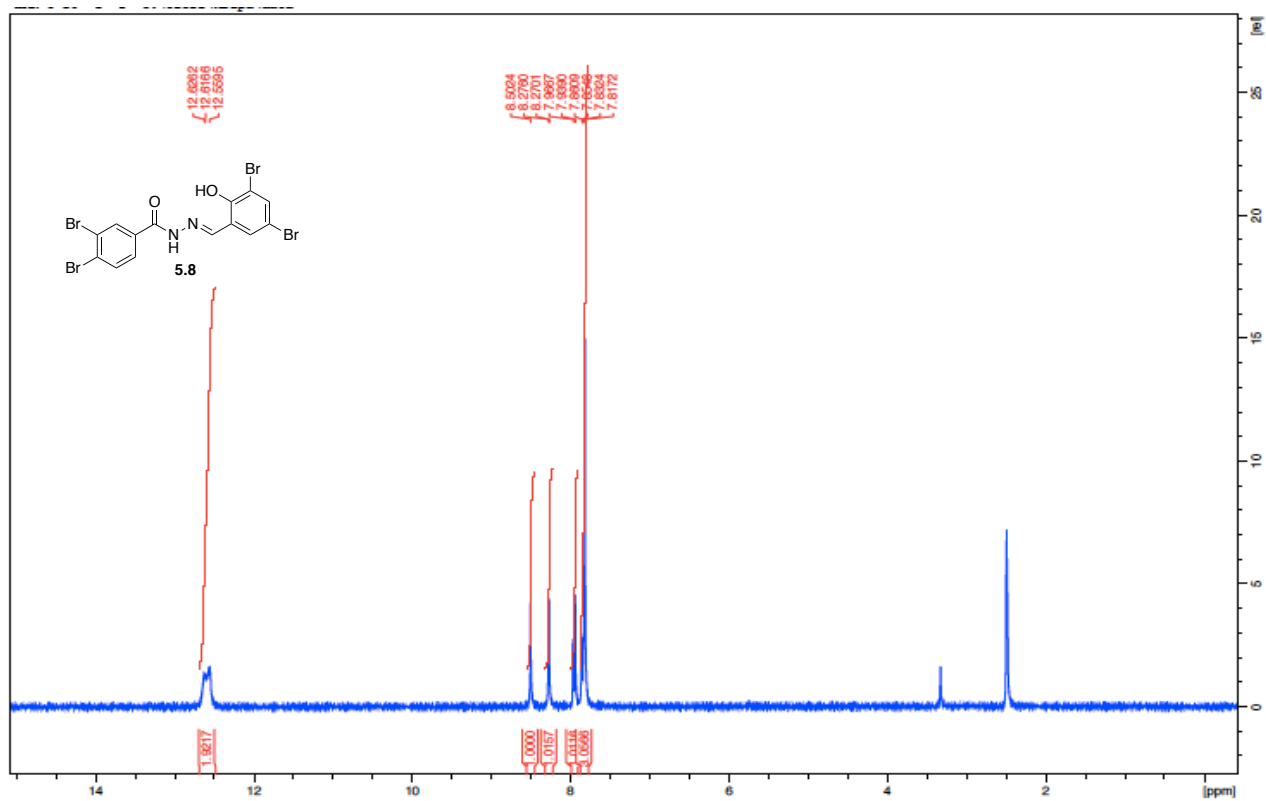

**<sup>1</sup>H NMR of compound 5.8**

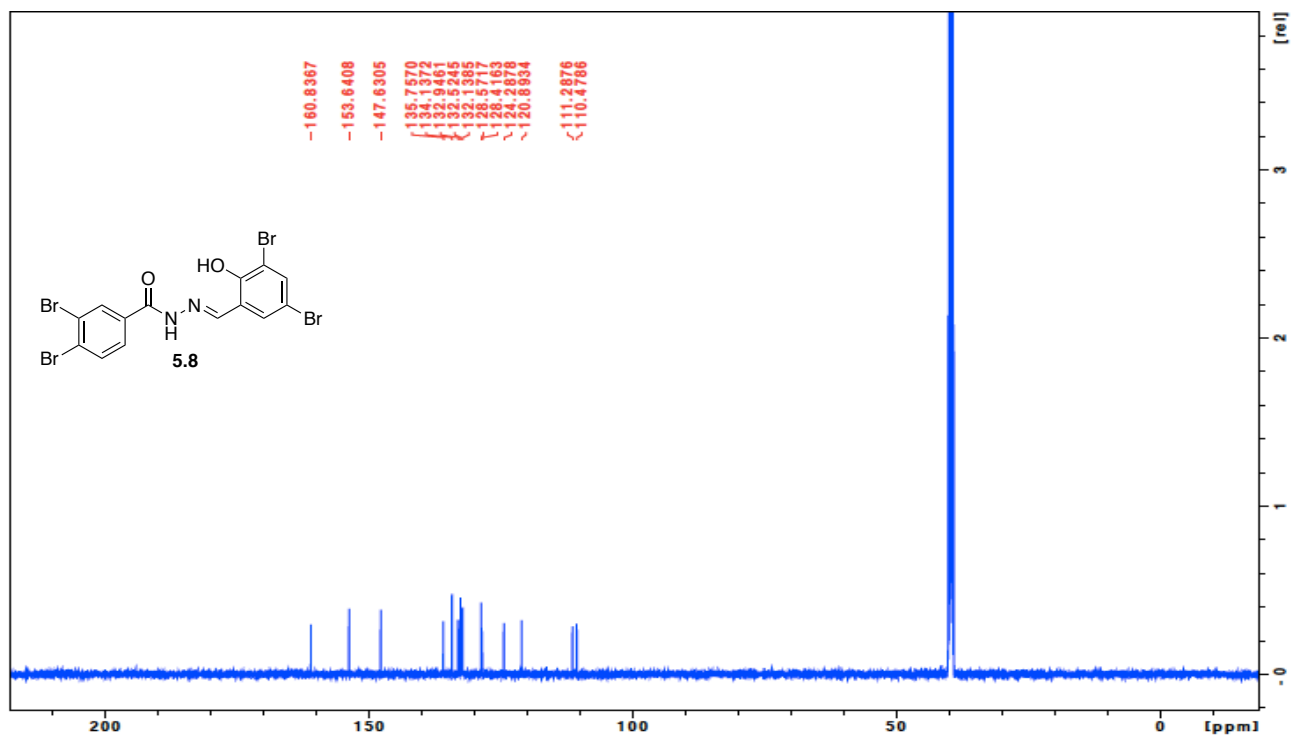

**<sup>13</sup>C NMR of compound 5.8**

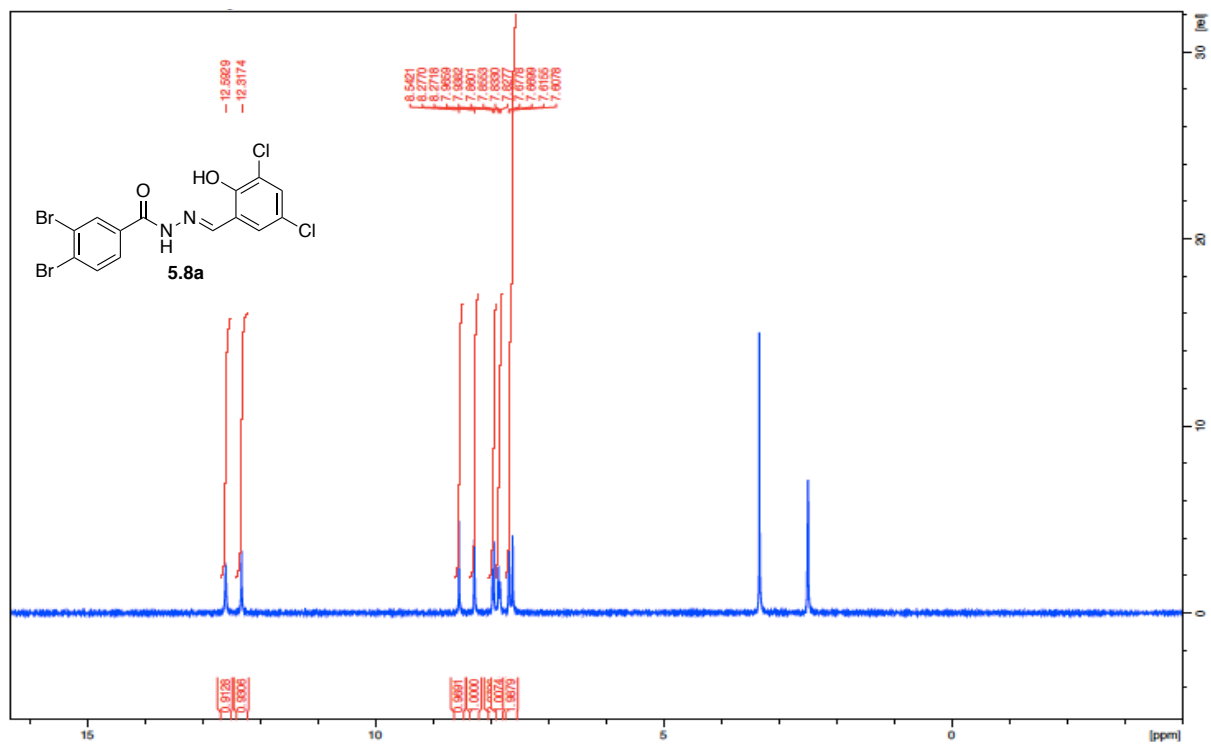

<sup>1</sup>H NMR of compound 5.8a

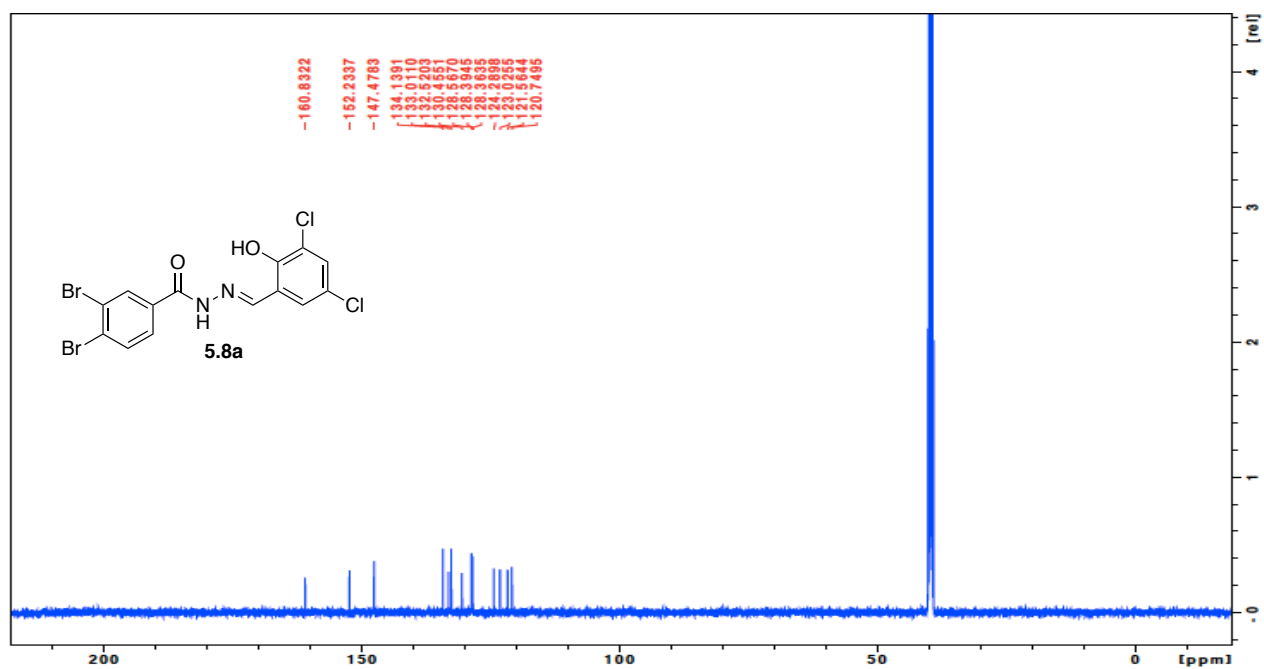

<sup>13</sup>C NMR of compound 5.8a

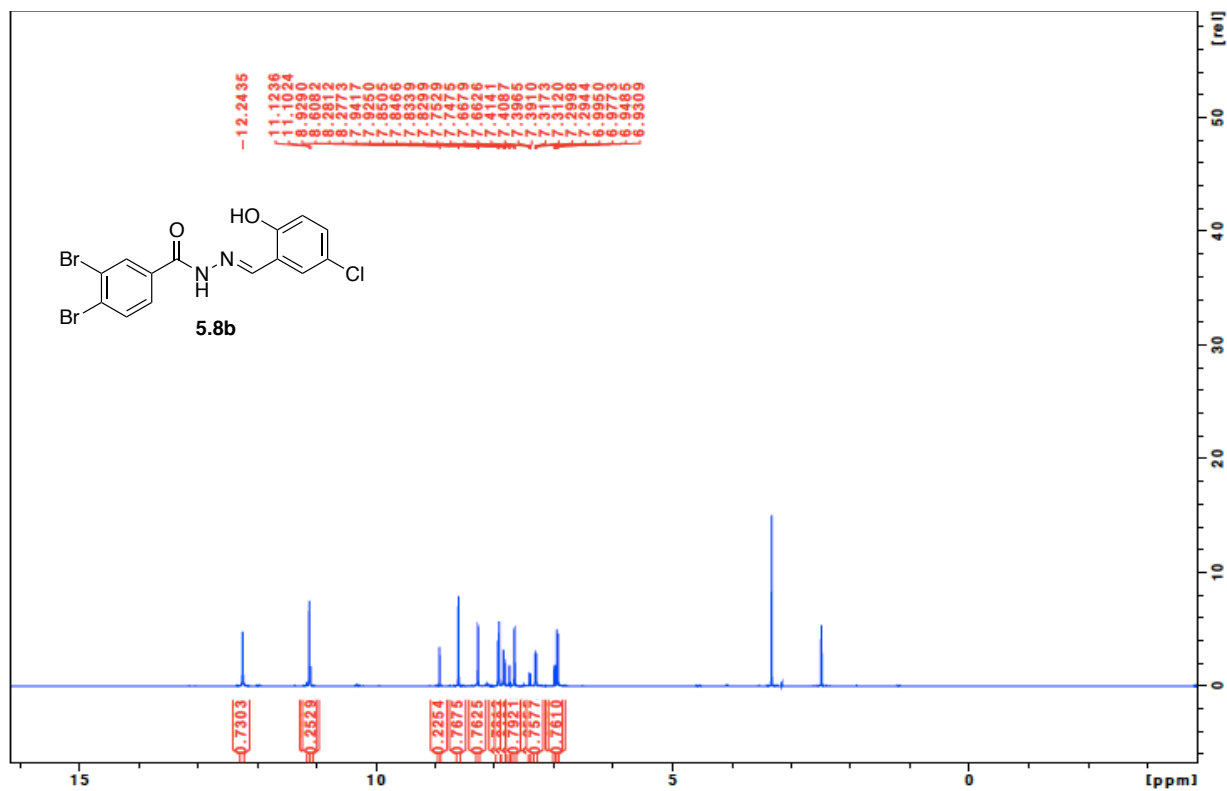

<sup>1</sup>H NMR of compound 5.8b

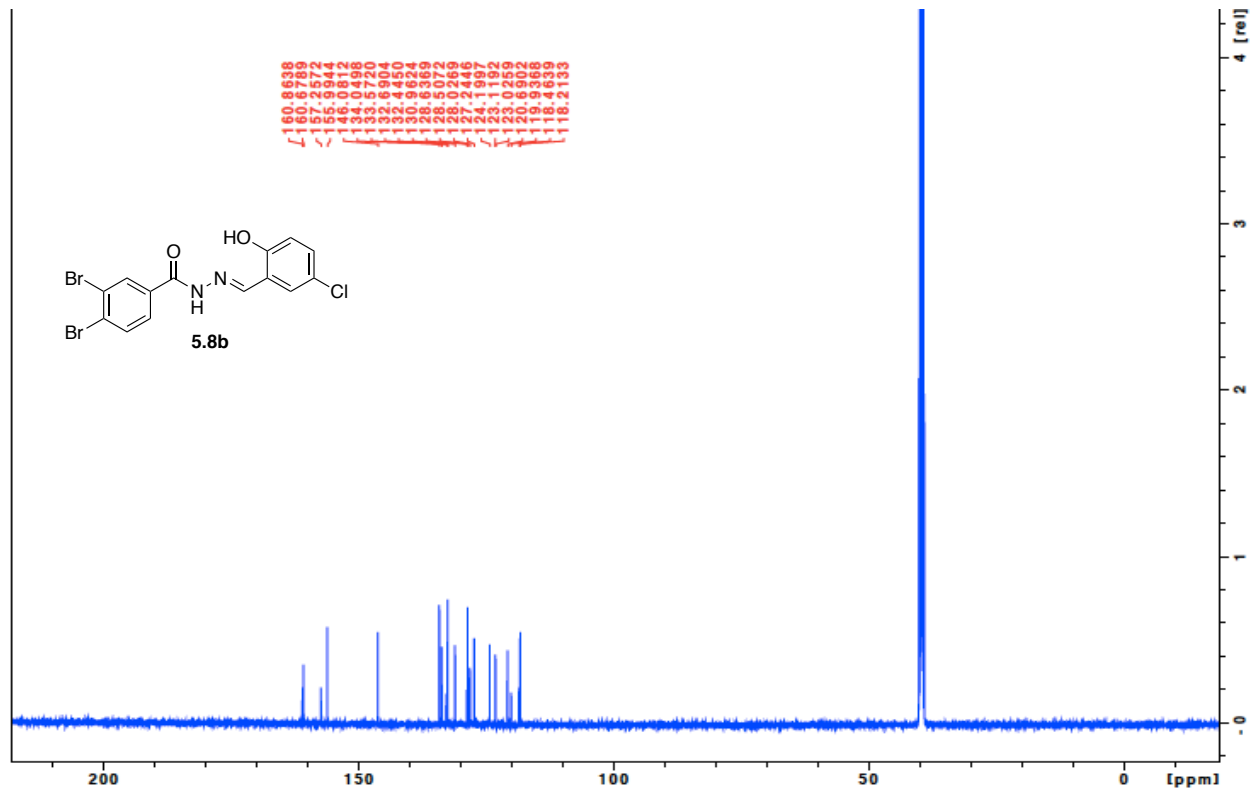

<sup>13</sup>C NMR of compound 5.8b



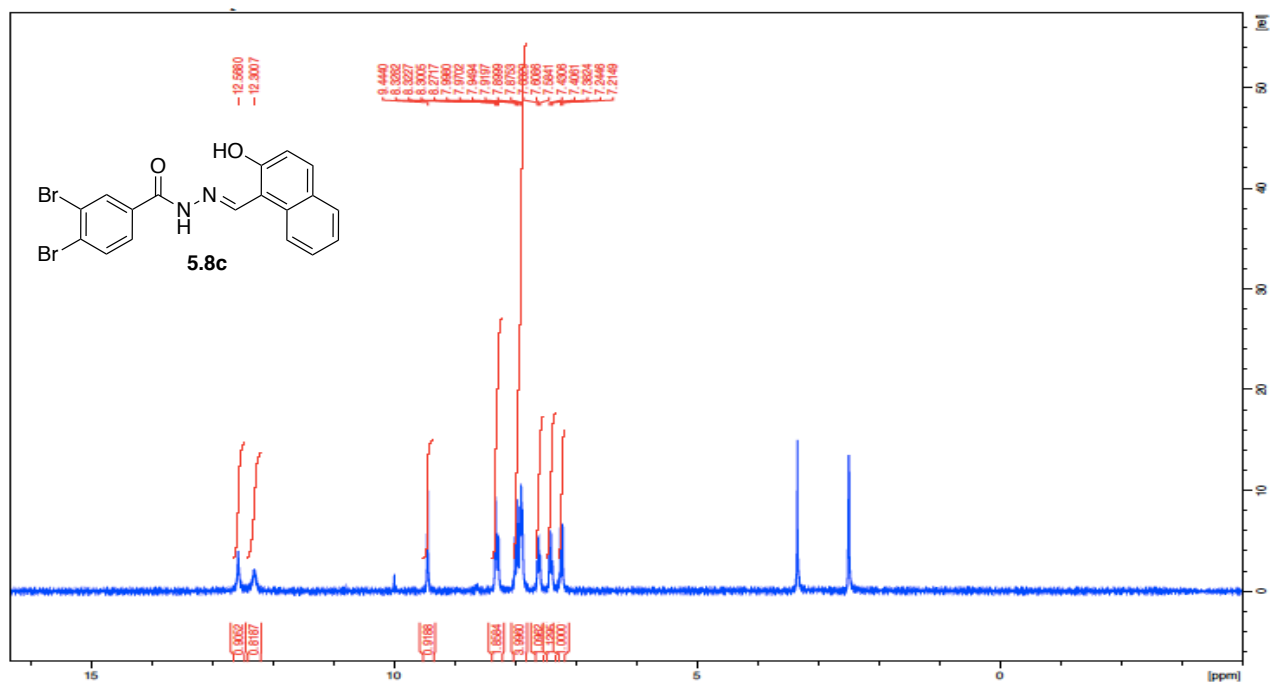

<sup>1</sup>H NMR of compound 5.8c

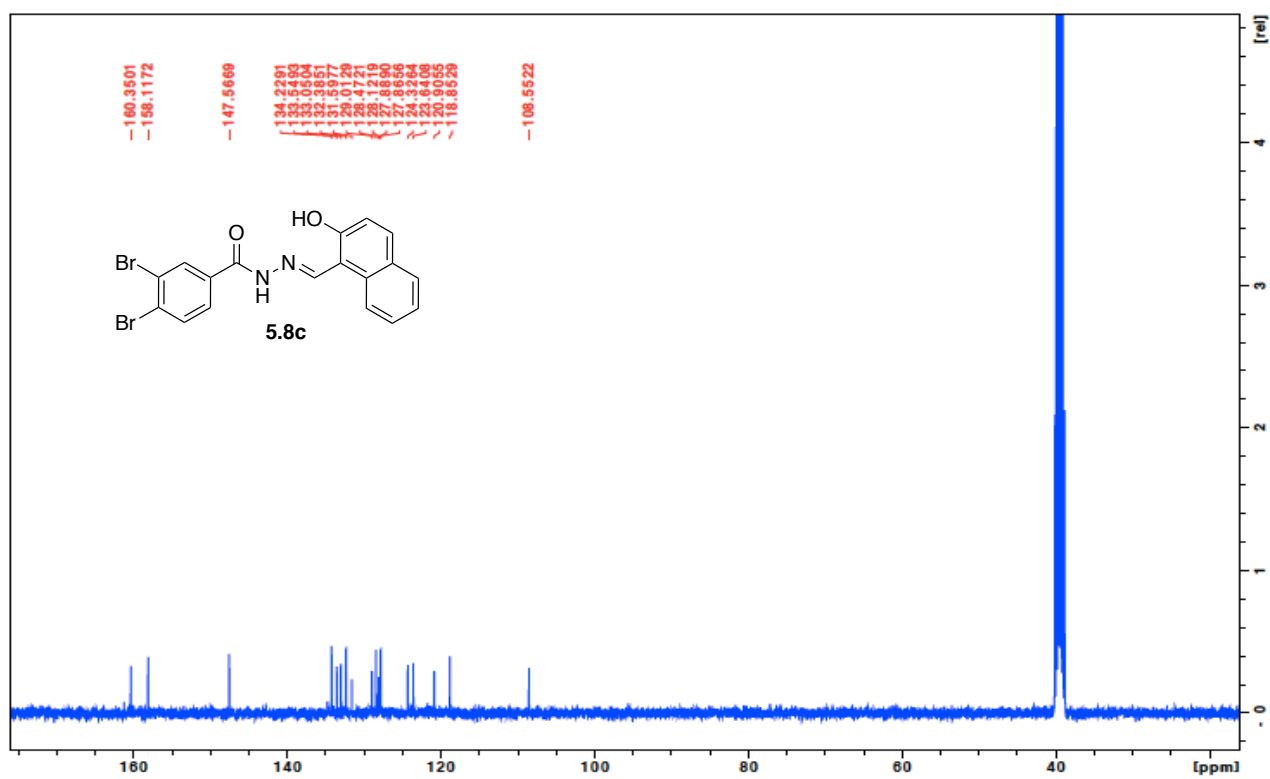

<sup>13</sup>C NMR of compound 5.8c

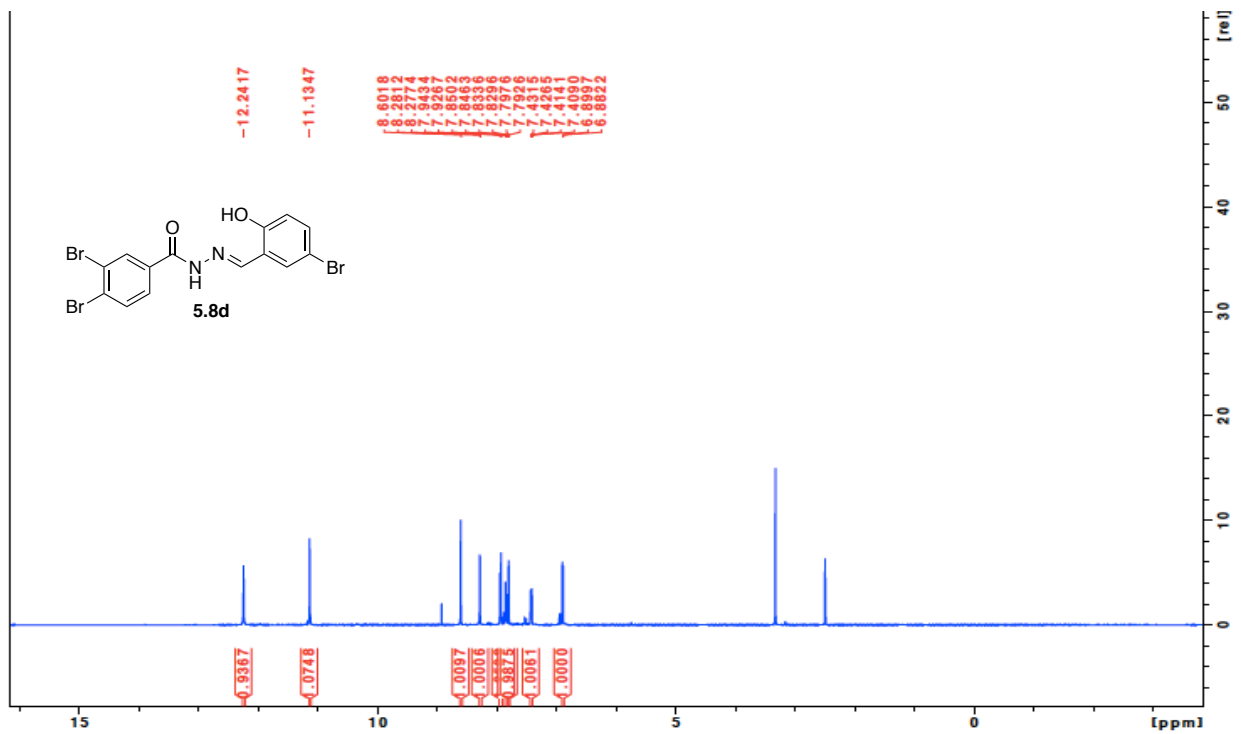

**<sup>1</sup>H NMR of compound 5.8d**

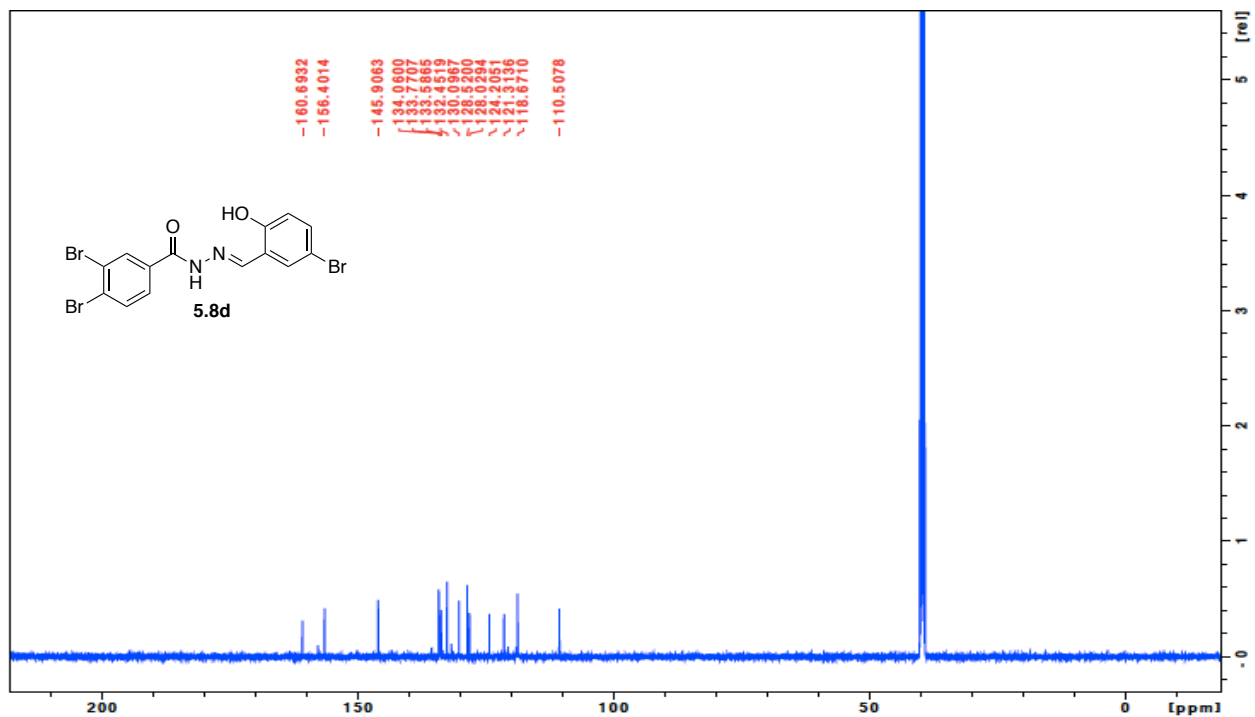

**<sup>13</sup>C NMR of compound 5.8d**

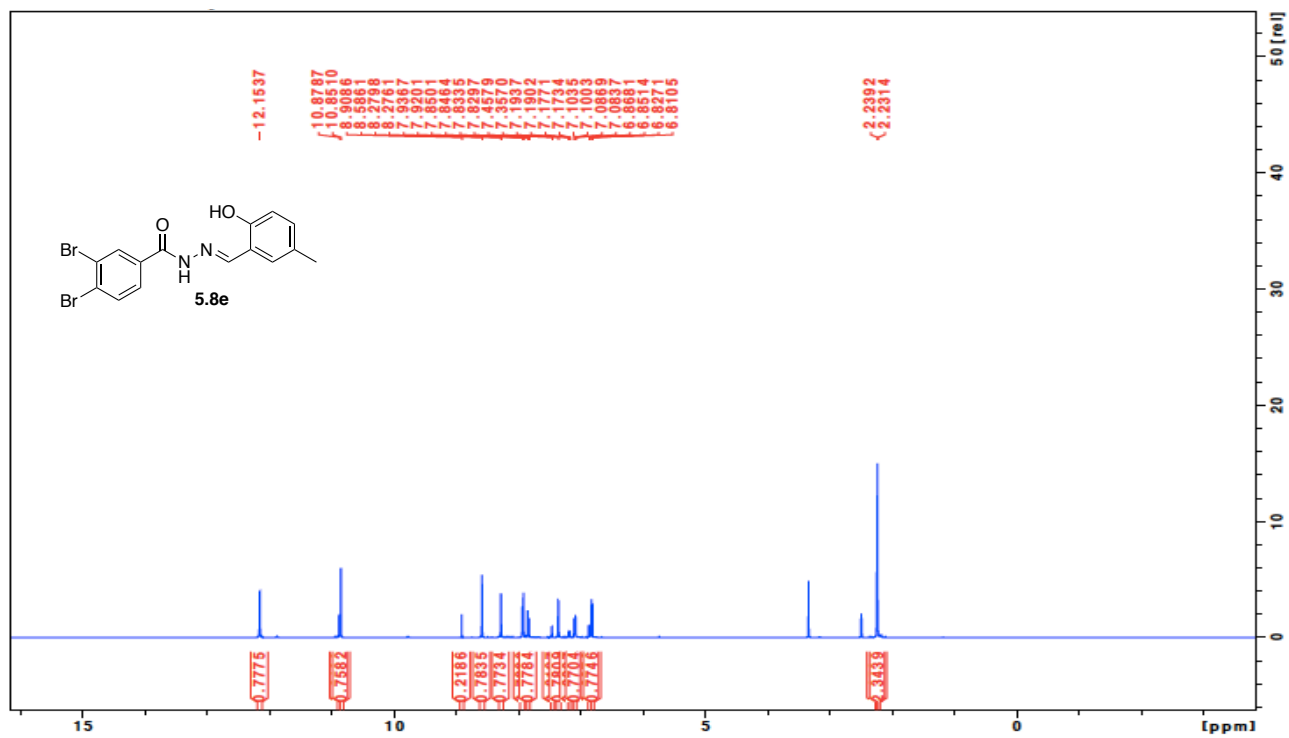

**<sup>1</sup>H NMR of compound 5.8e**

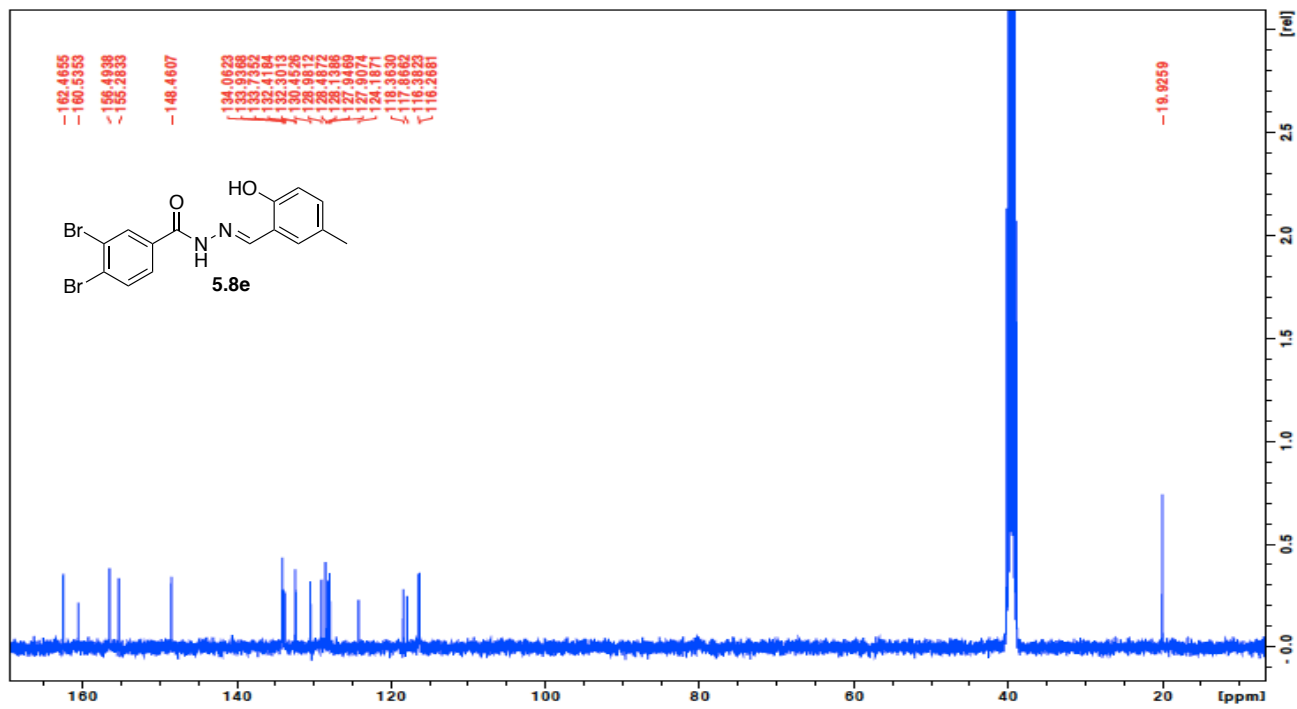

**<sup>13</sup>C NMR of compound 5.8e**

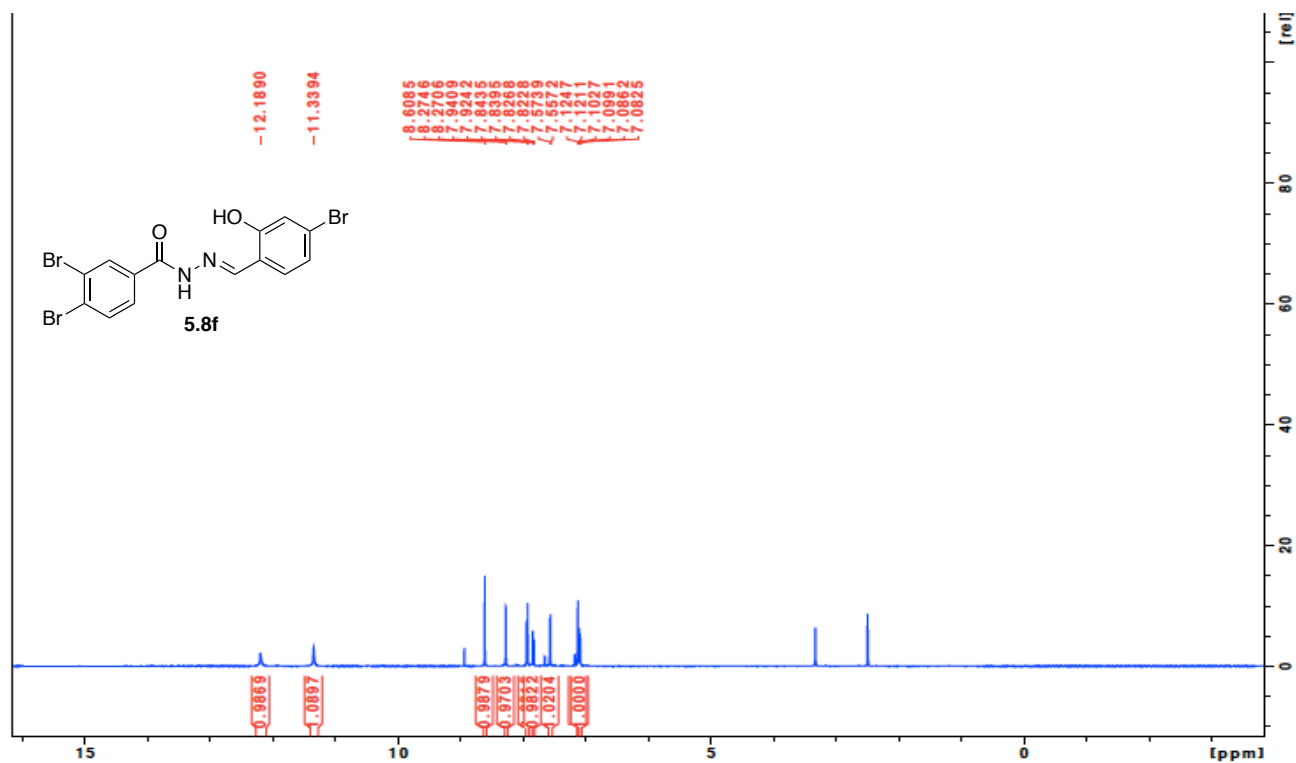

<sup>1</sup>H NMR of compound 5.8f

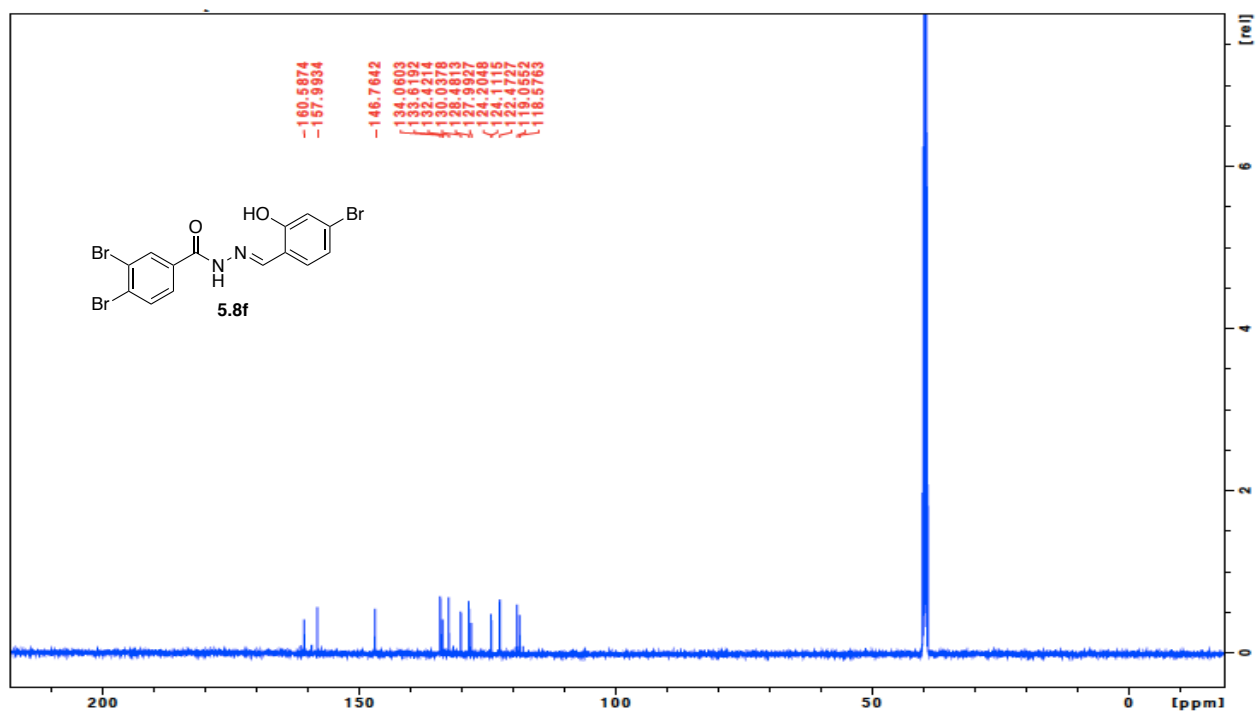

<sup>13</sup>C NMR of compound 5.8f

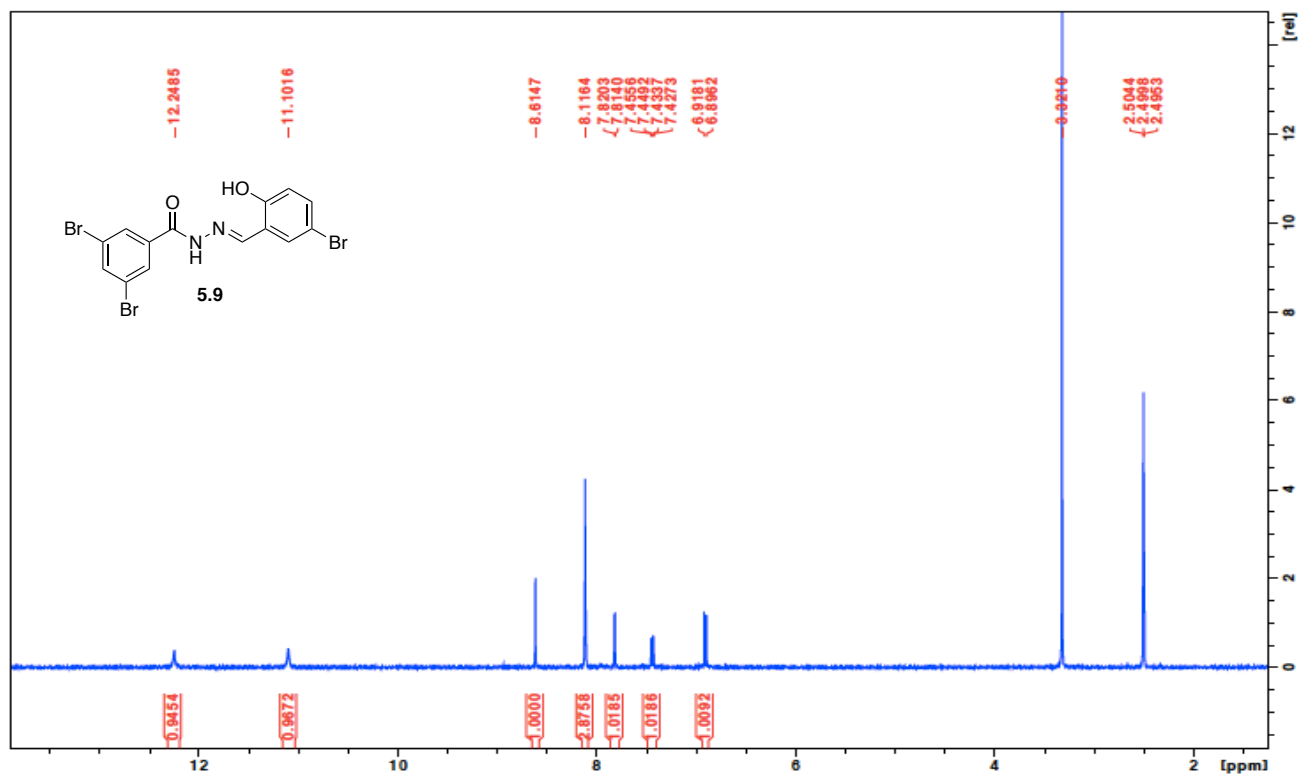

<sup>1</sup>H NMR of compound 5.9

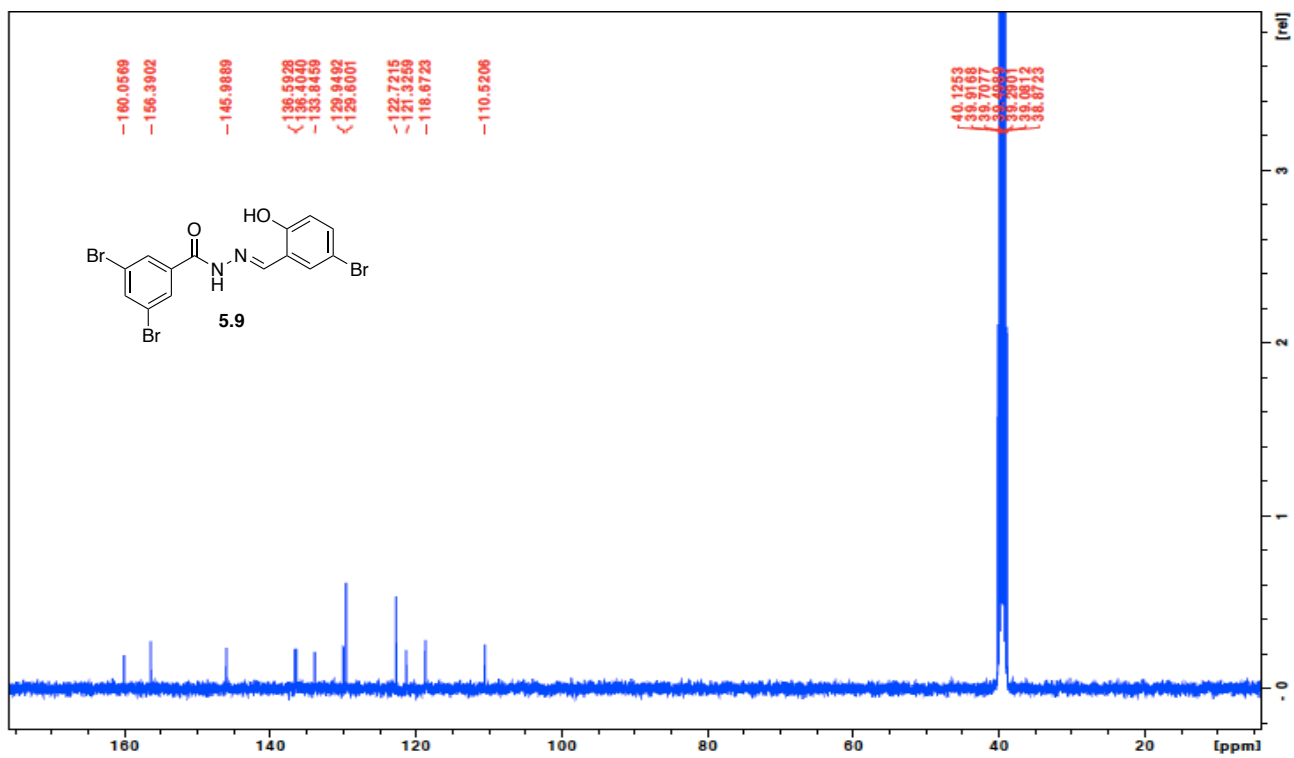

<sup>13</sup>C NMR of compound 5.9

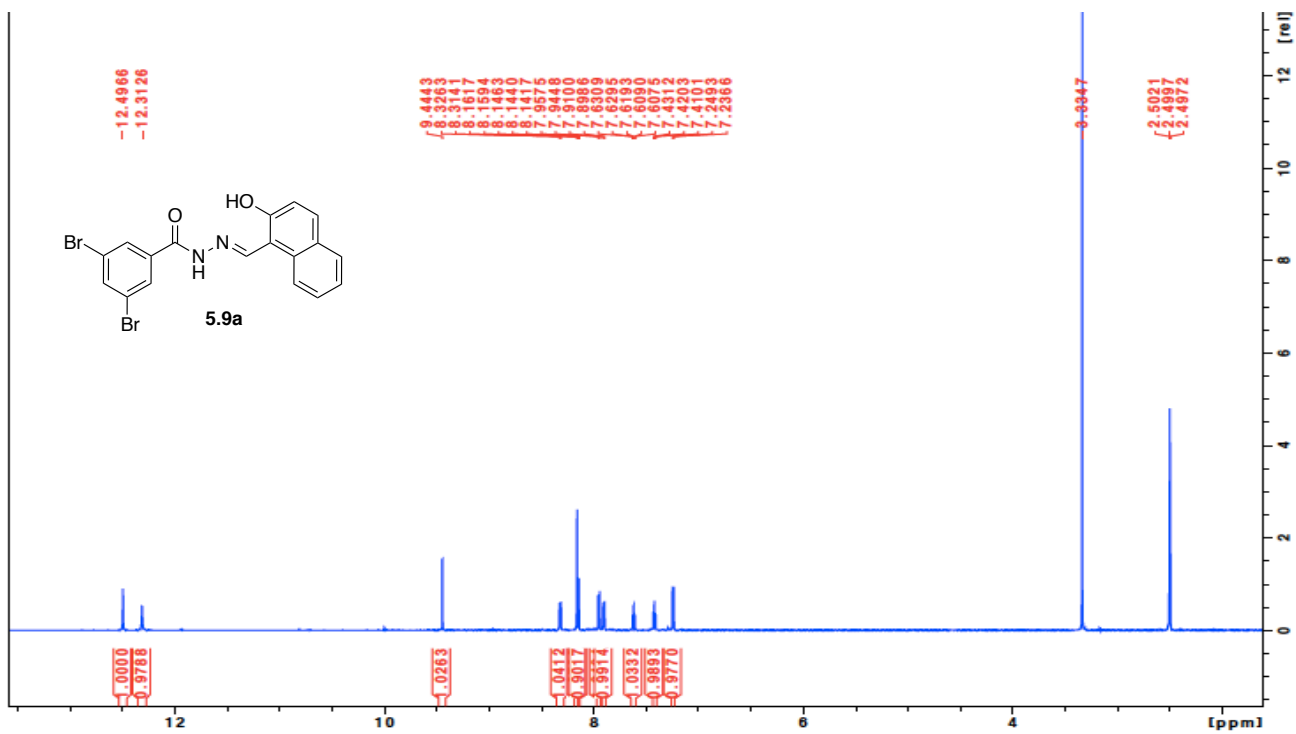

<sup>1</sup>H NMR of compound 5.9a

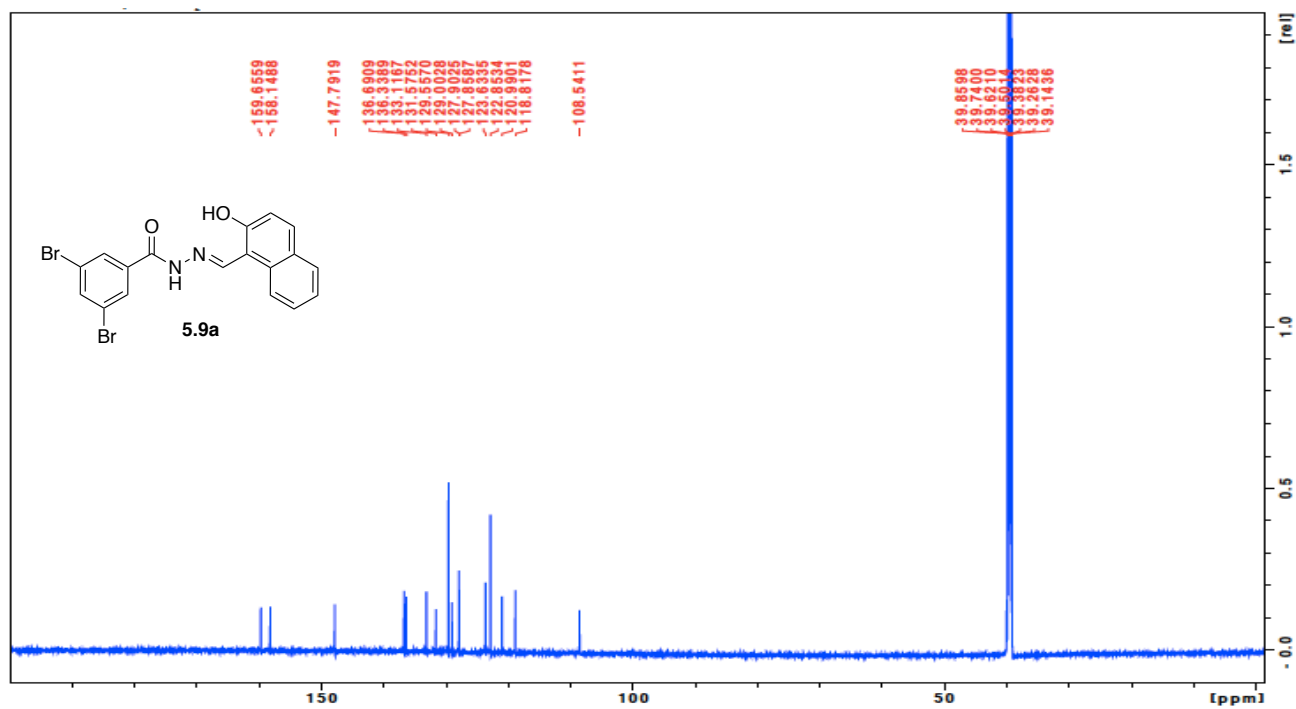

<sup>13</sup>C NMR of compound 5.9a

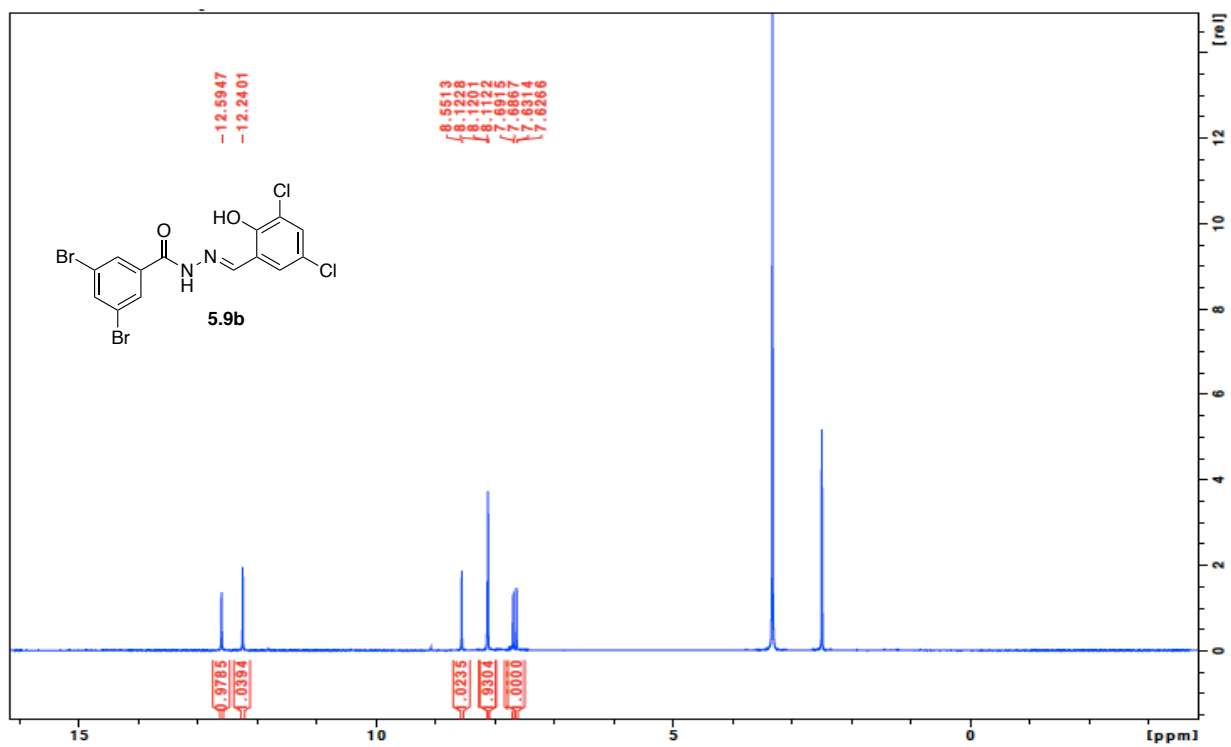

**<sup>1</sup>H NMR of compound 5.9b**

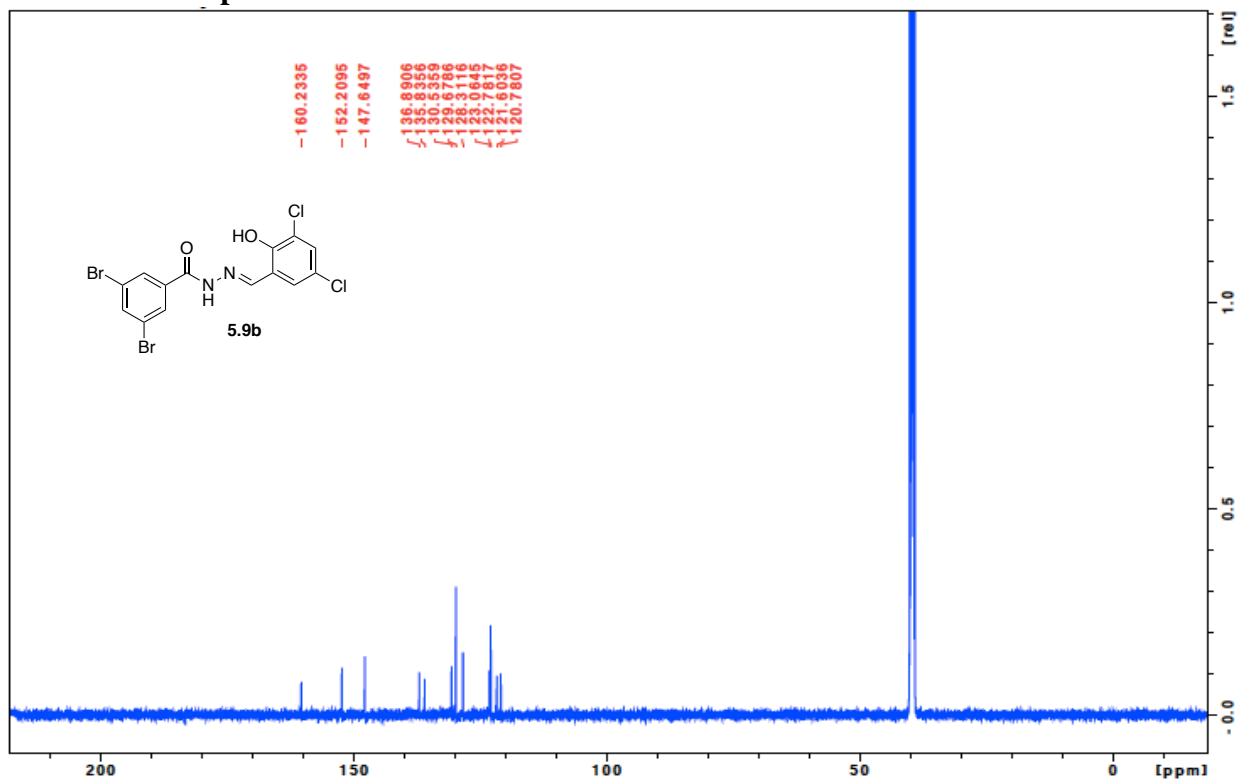

**<sup>13</sup>C NMR of compound 5.9b**

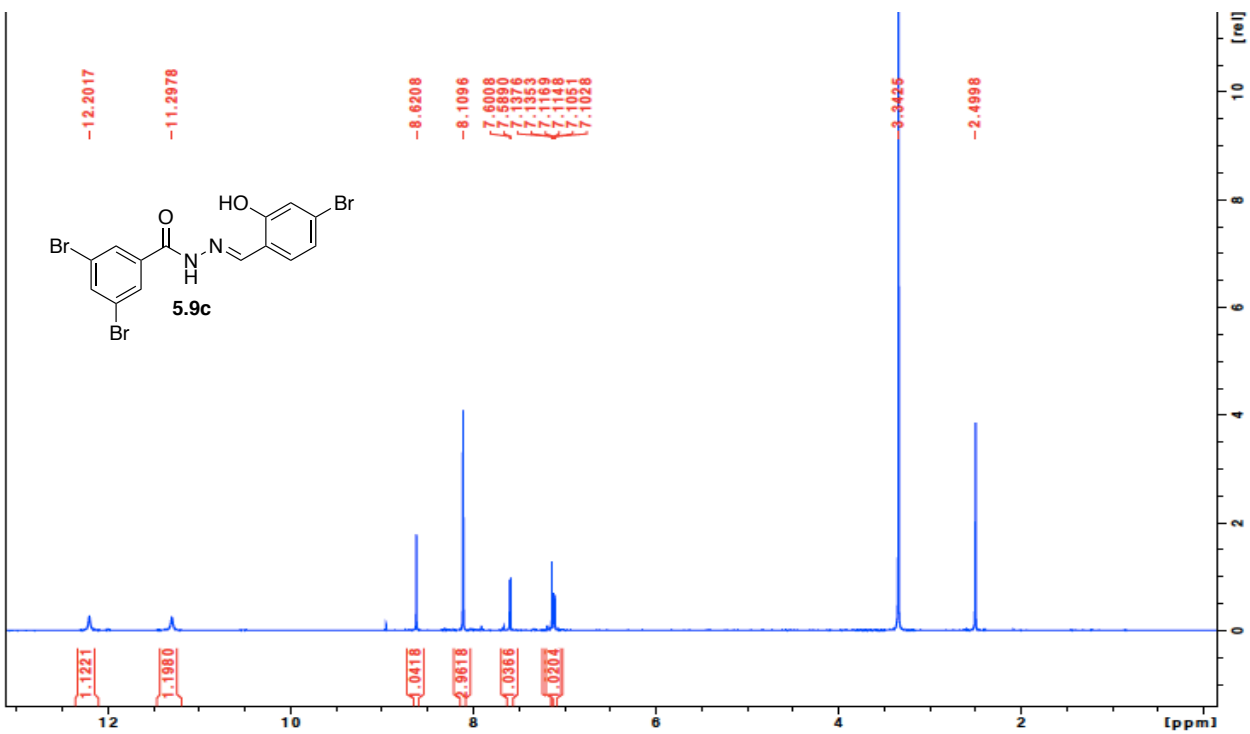

<sup>1</sup>H NMR of compound 5.9c

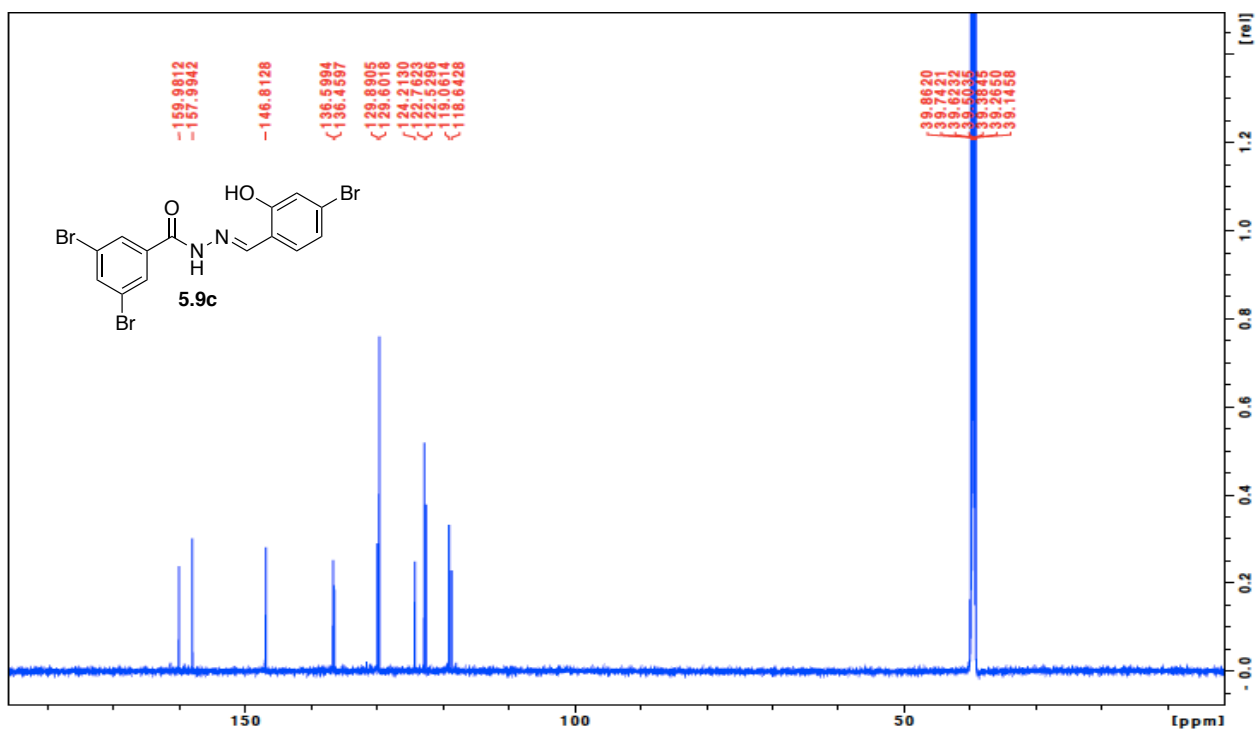

<sup>13</sup>C NMR of compound 5.9c



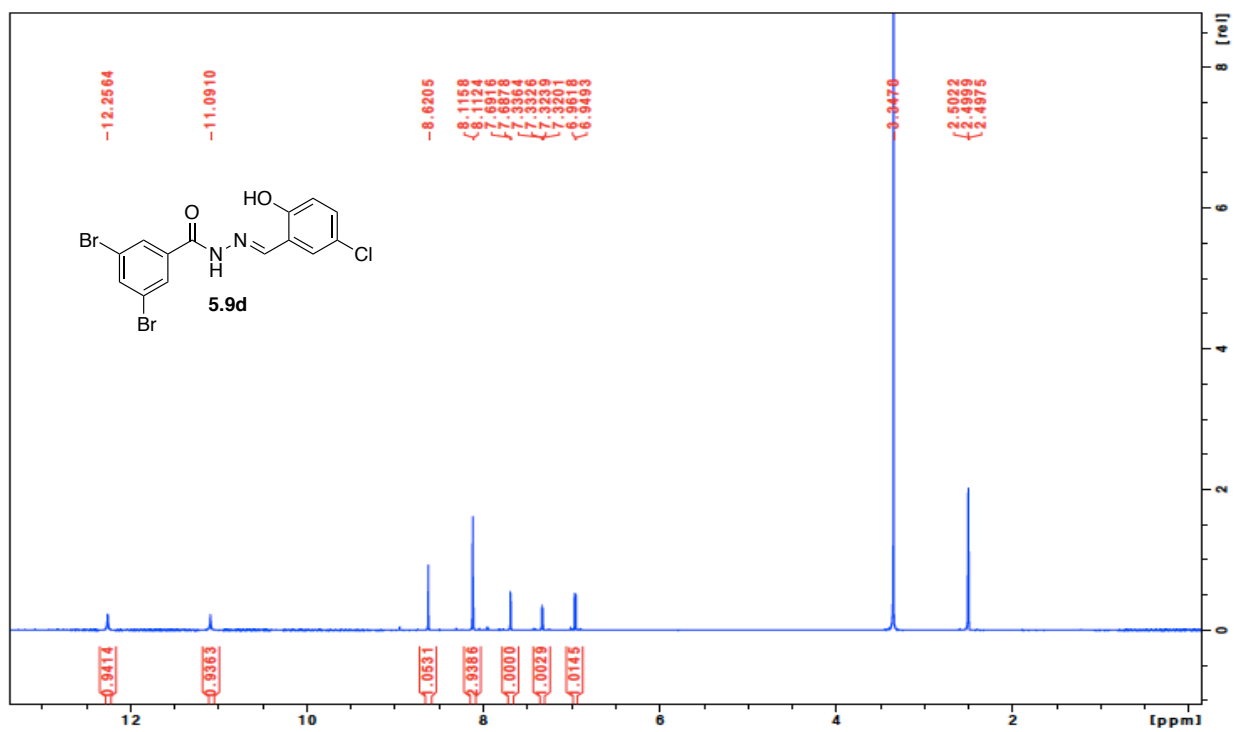

**<sup>1</sup>H NMR of compound 5.9d**

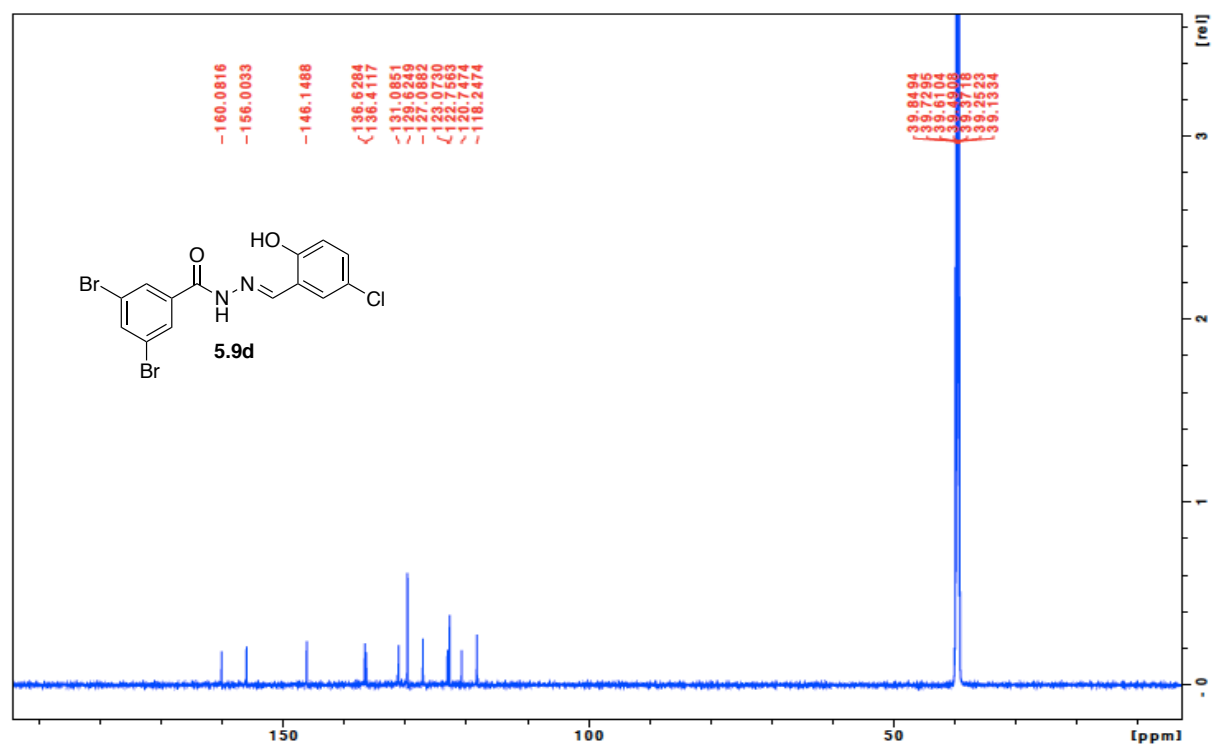

**<sup>13</sup>C NMR of compound 5.9d**

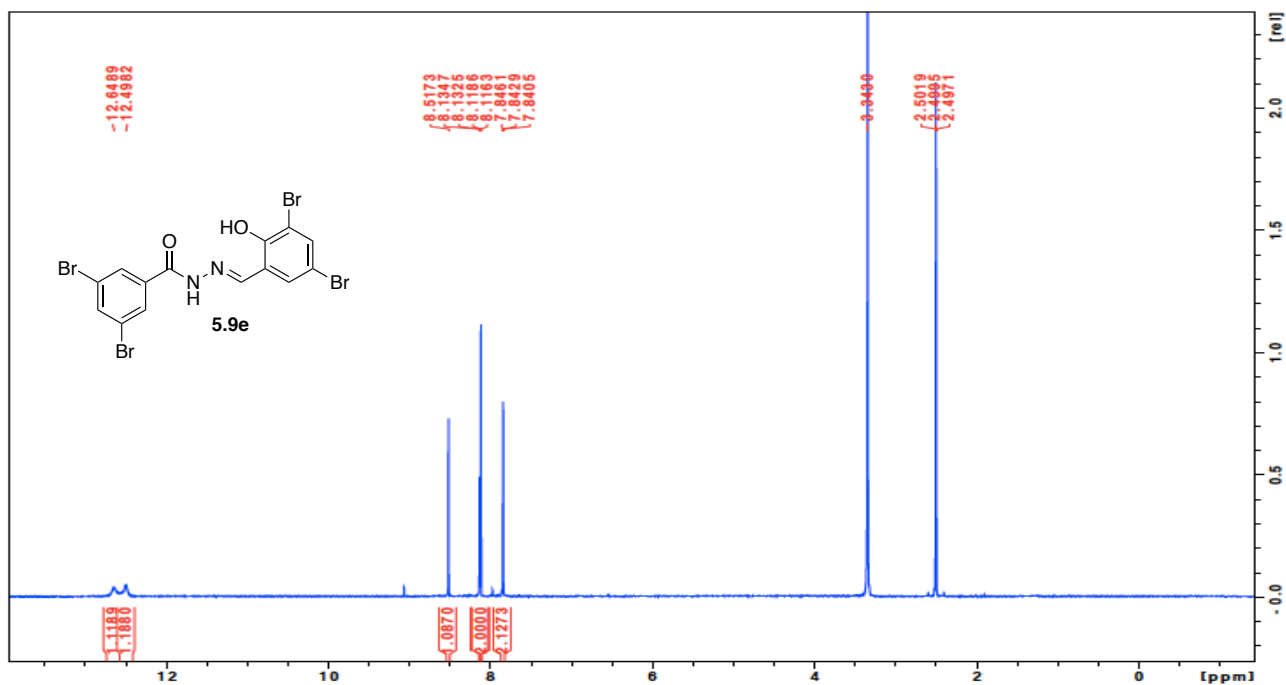

<sup>1</sup>H NMR of compound 5.9e

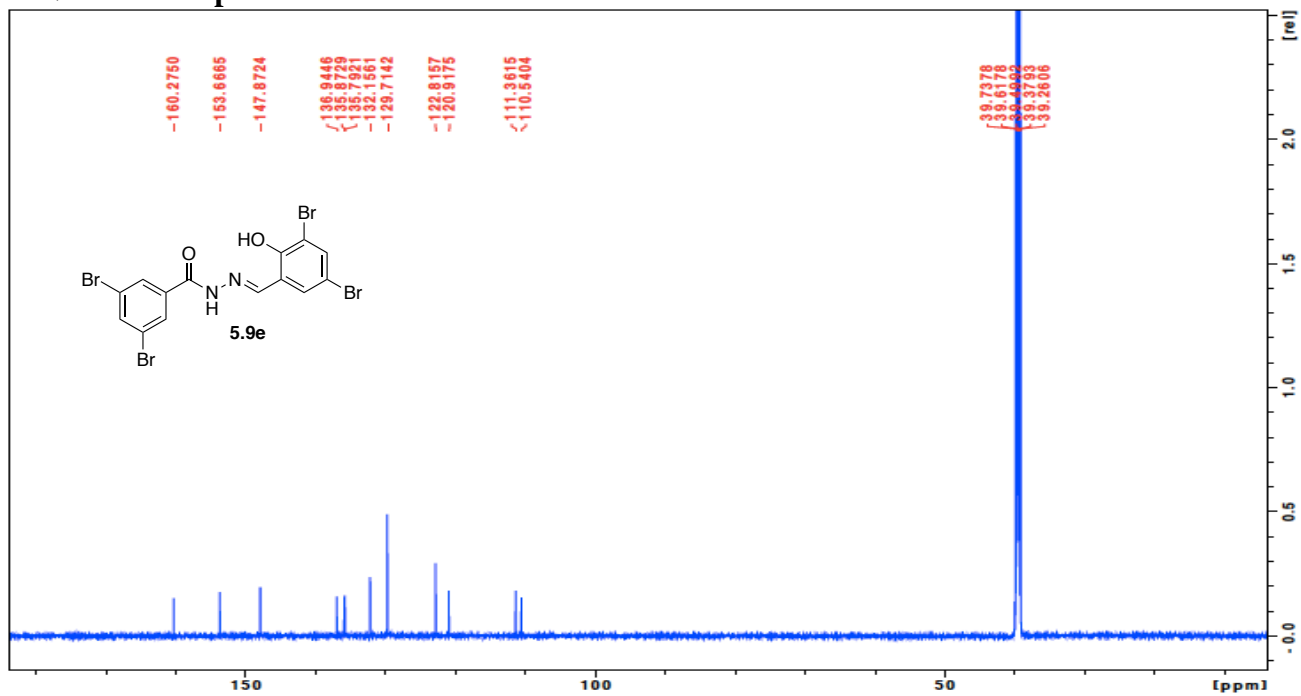

<sup>13</sup>C NMR of compound 5.9e

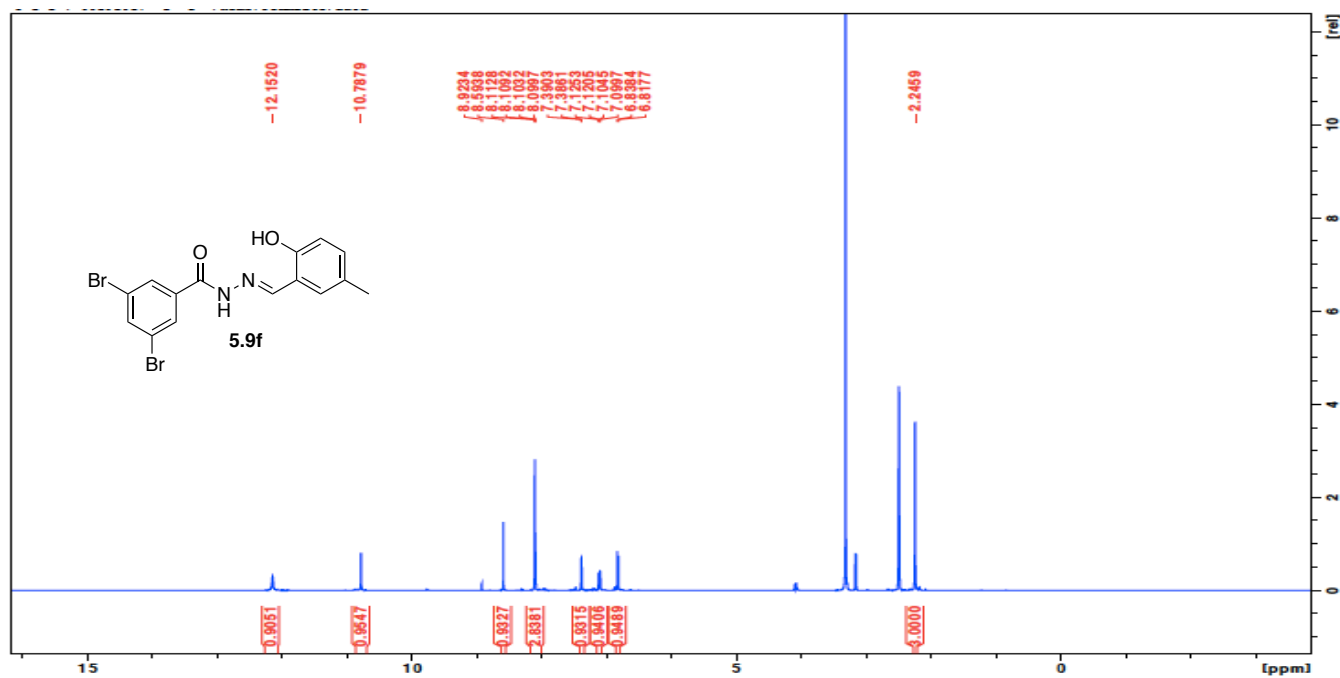

**<sup>1</sup>H NMR of compound 5.9f**

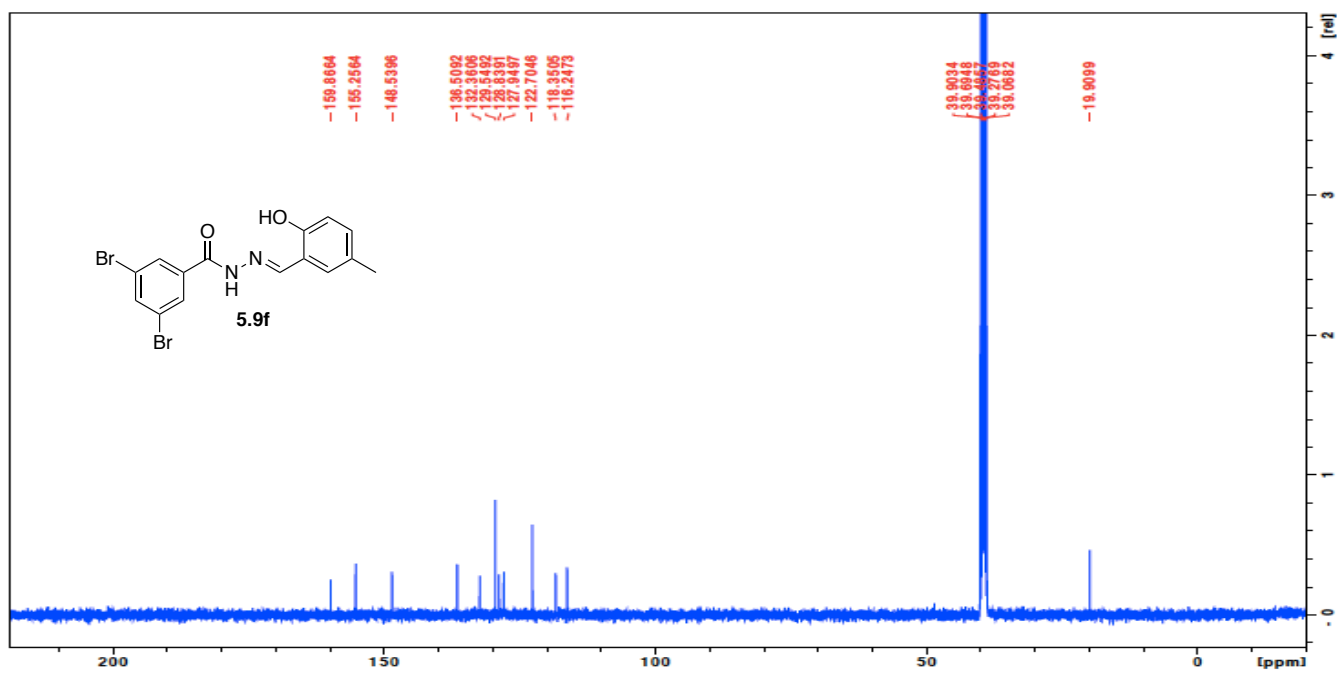

**<sup>13</sup>C NMR of compound 5.9f**

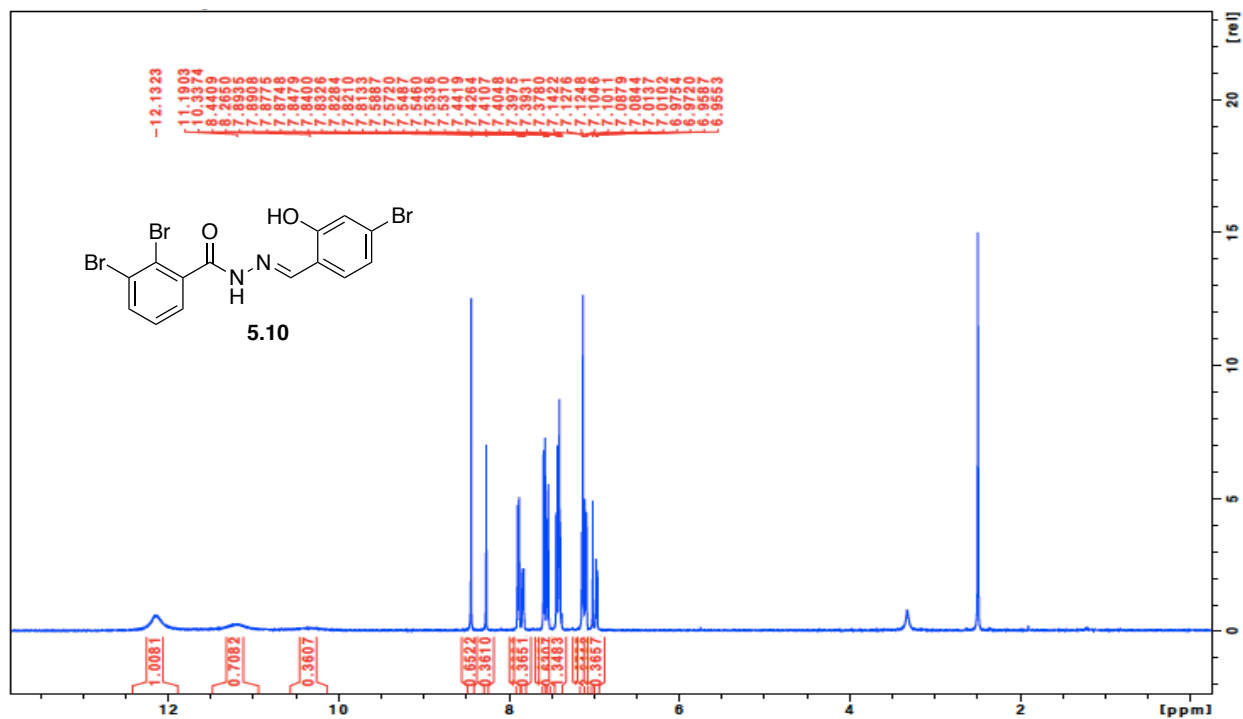

**<sup>1</sup>H NMR of compound 5.10**

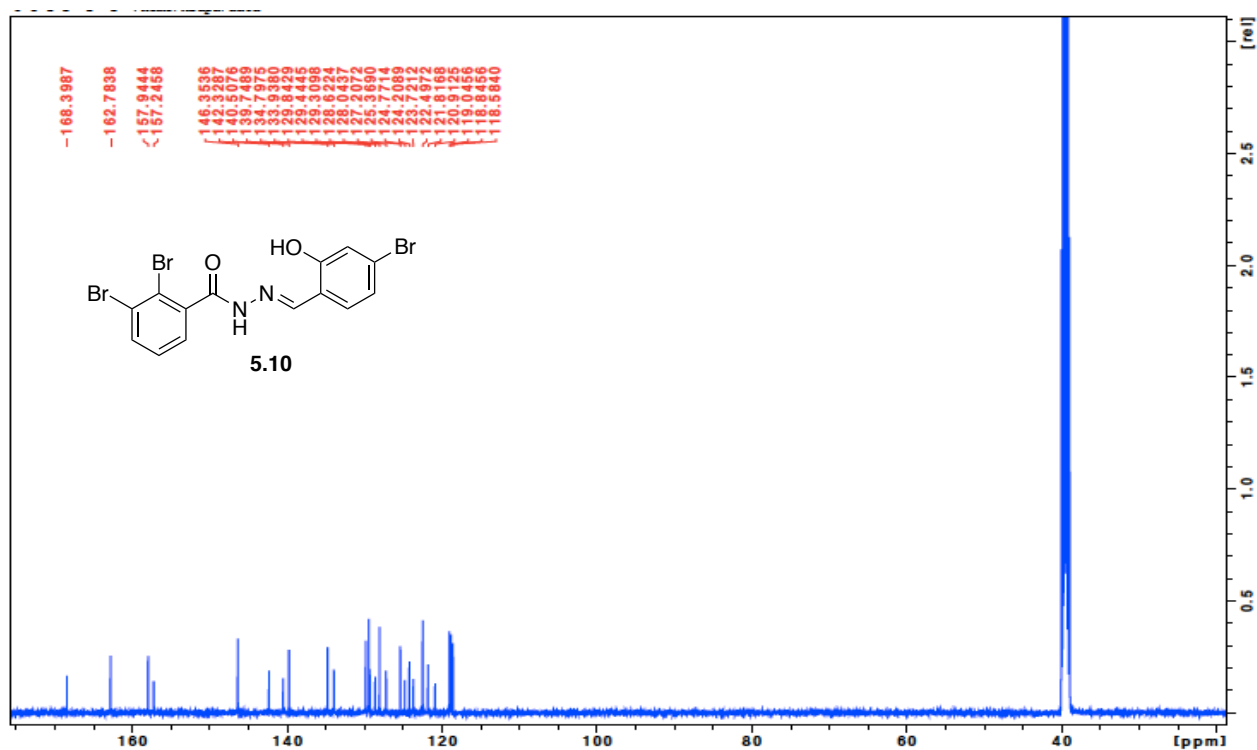

**<sup>13</sup>C NMR of compound 5.10**



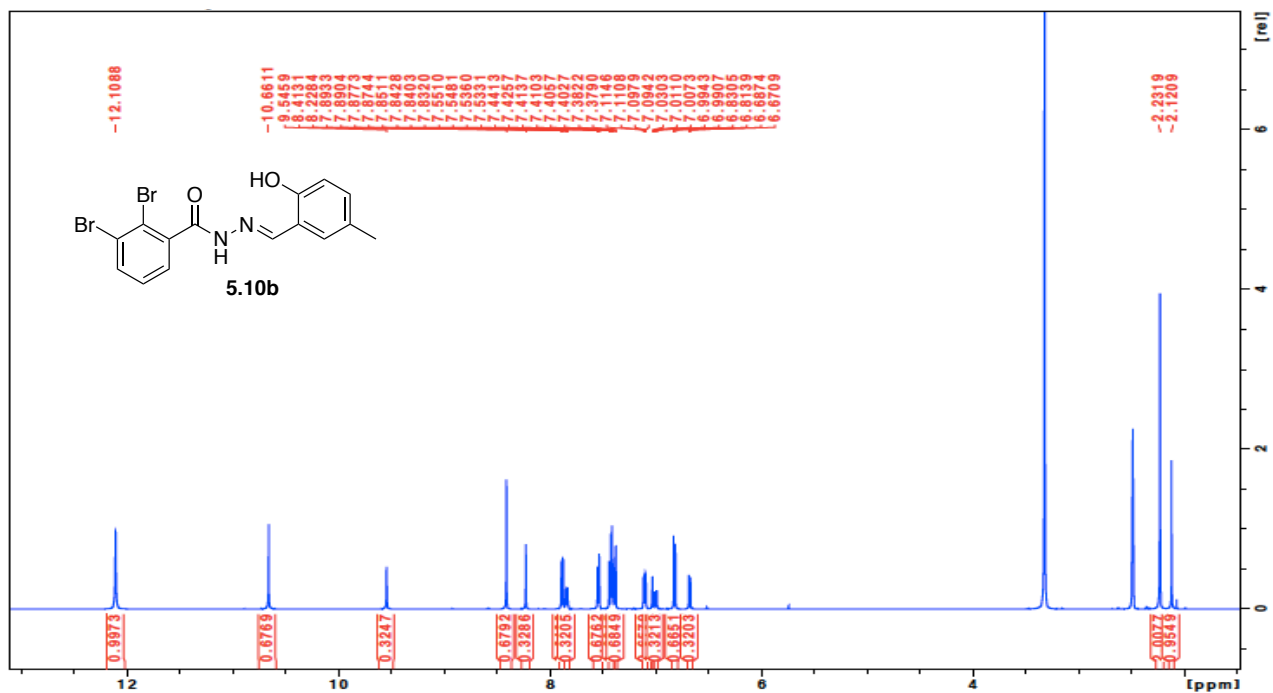

**<sup>1</sup>H NMR of compound 5.10b**

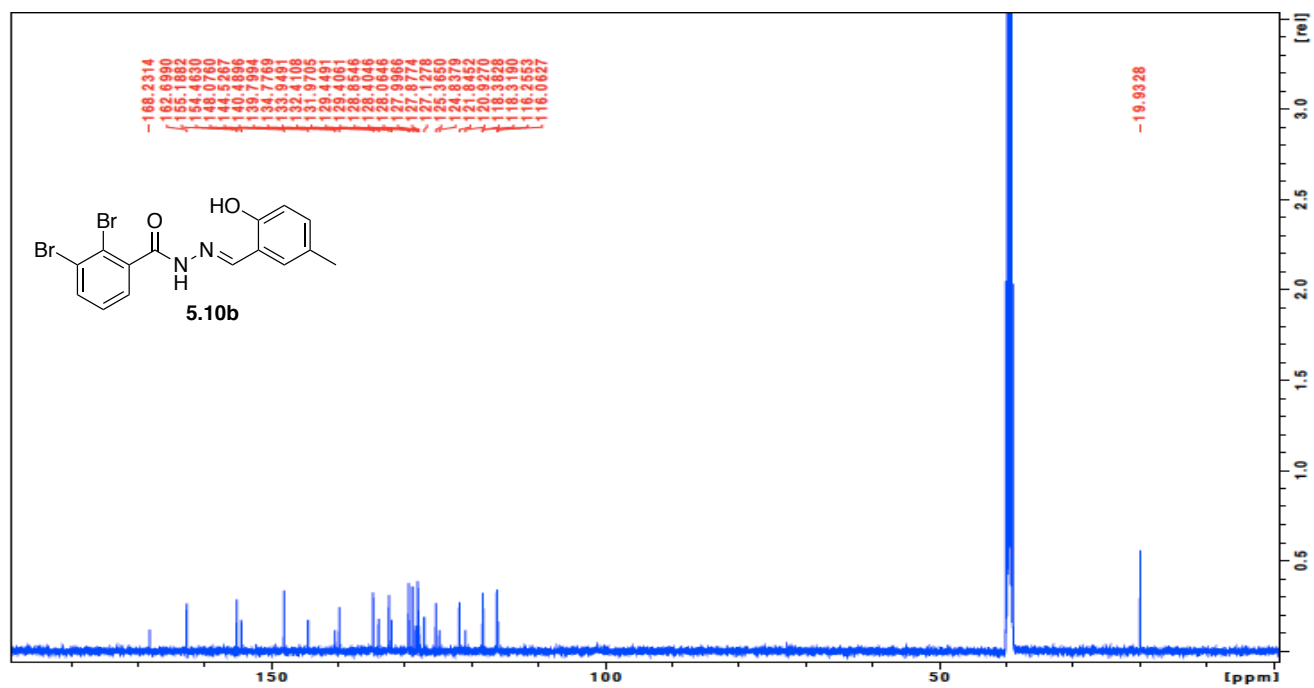

**<sup>13</sup>C NMR of compound 5.10b**

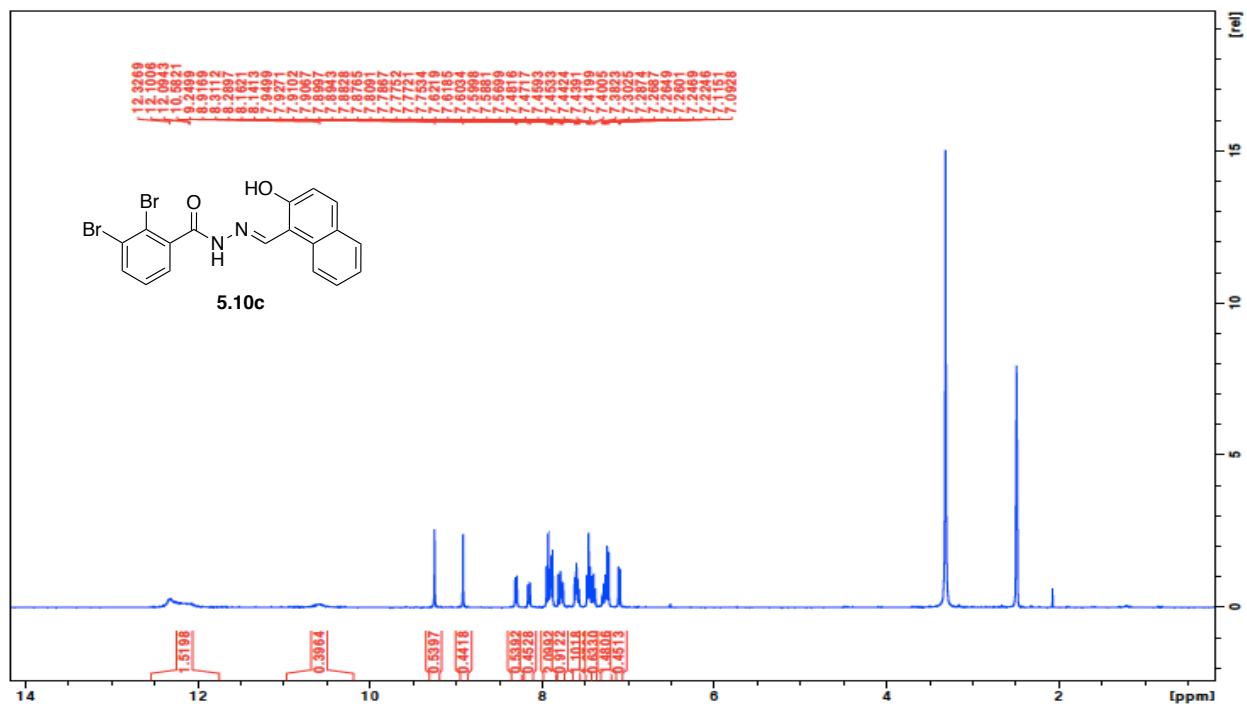

**<sup>1</sup>H NMR of compound 5.10c**

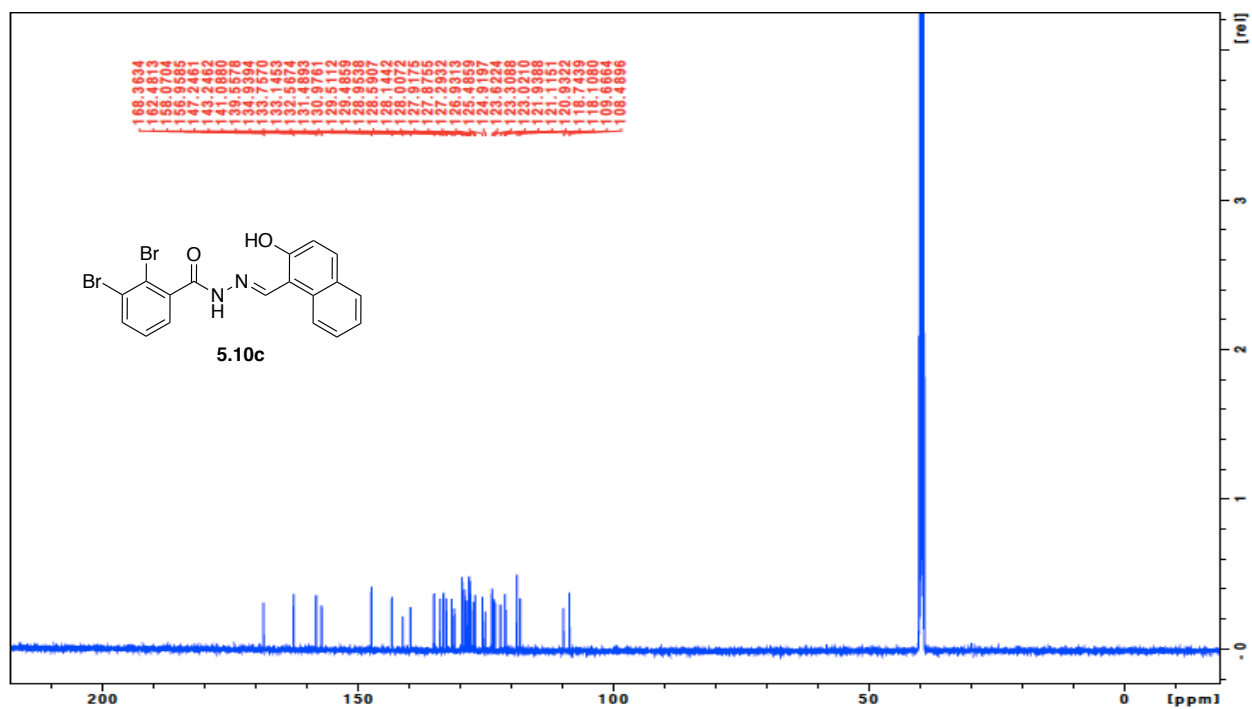

**<sup>13</sup>C NMR of compound 5.10c**

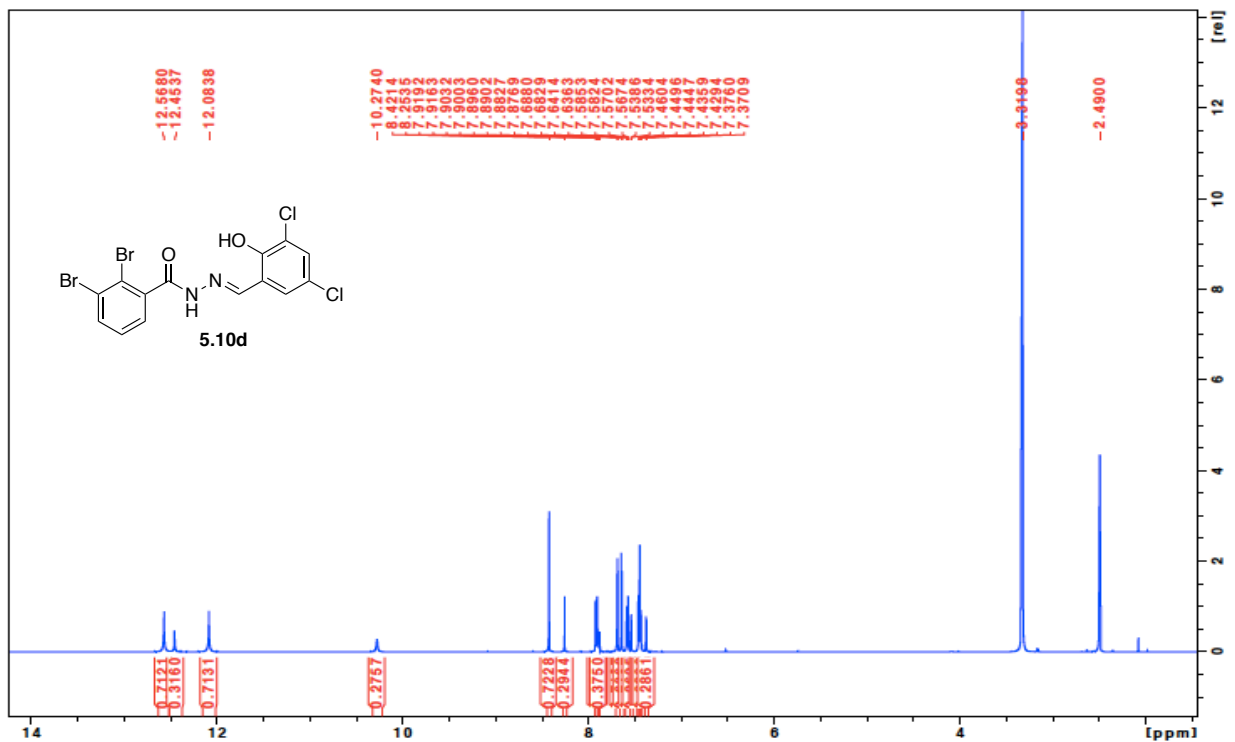

**<sup>1</sup>H NMR of compound 5.10d**

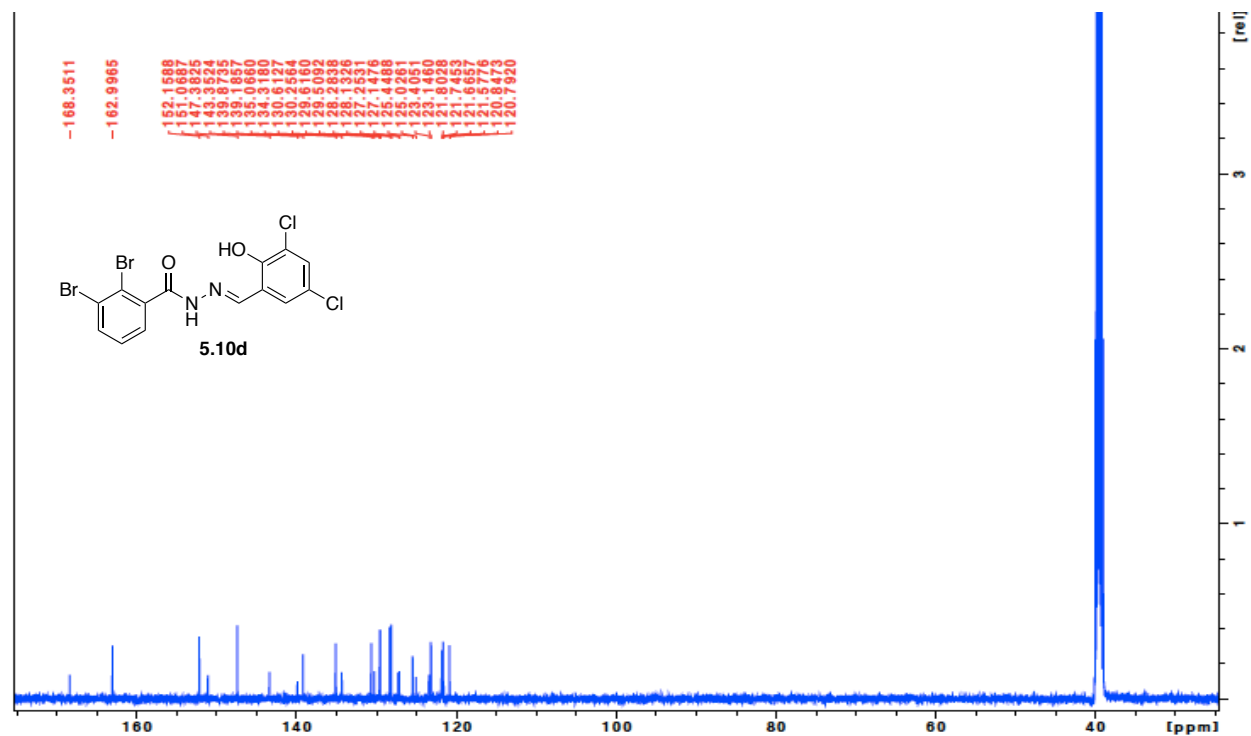

**<sup>13</sup>C NMR of compound 5.10d**



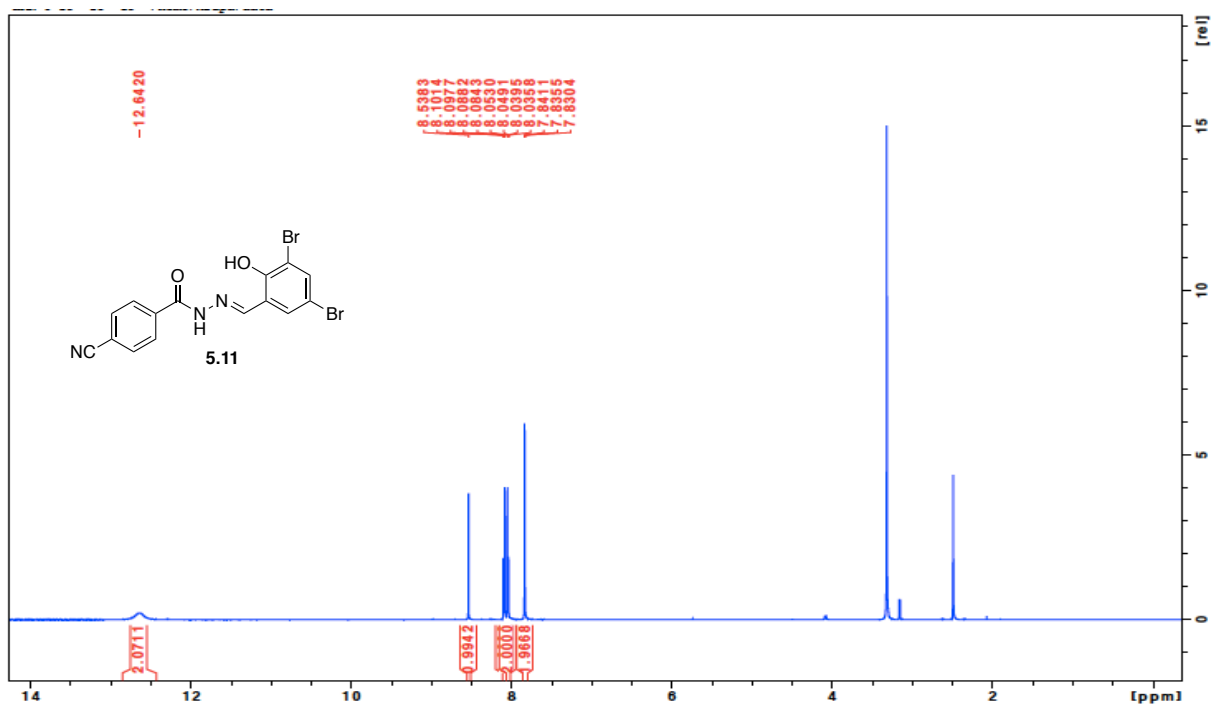

<sup>1</sup>H NMR of compound 5.11

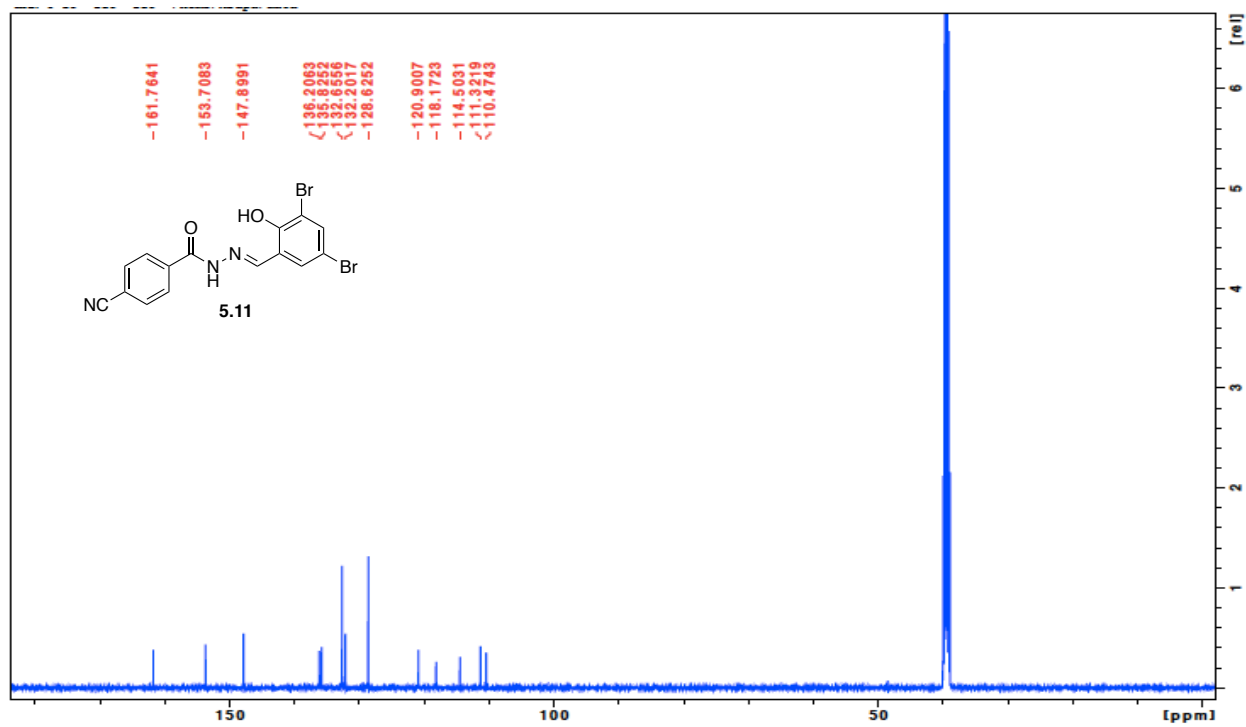

<sup>13</sup>C NMR of compound 5.11

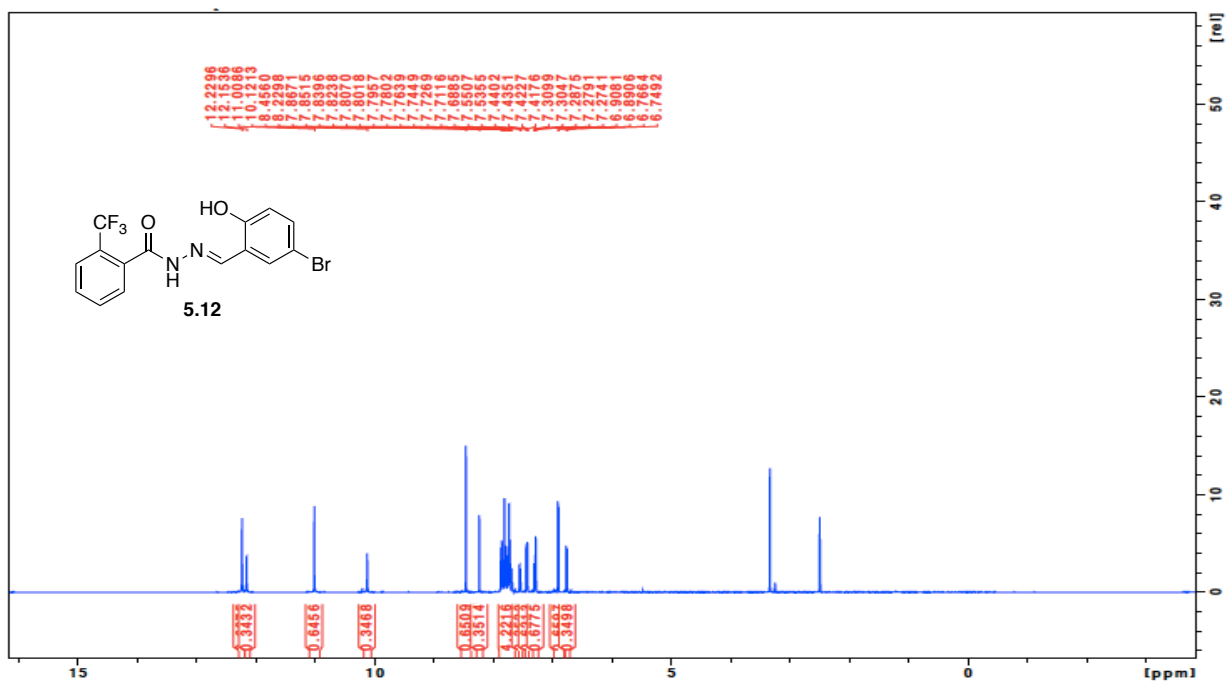

<sup>1</sup>H NMR of compound 5.12

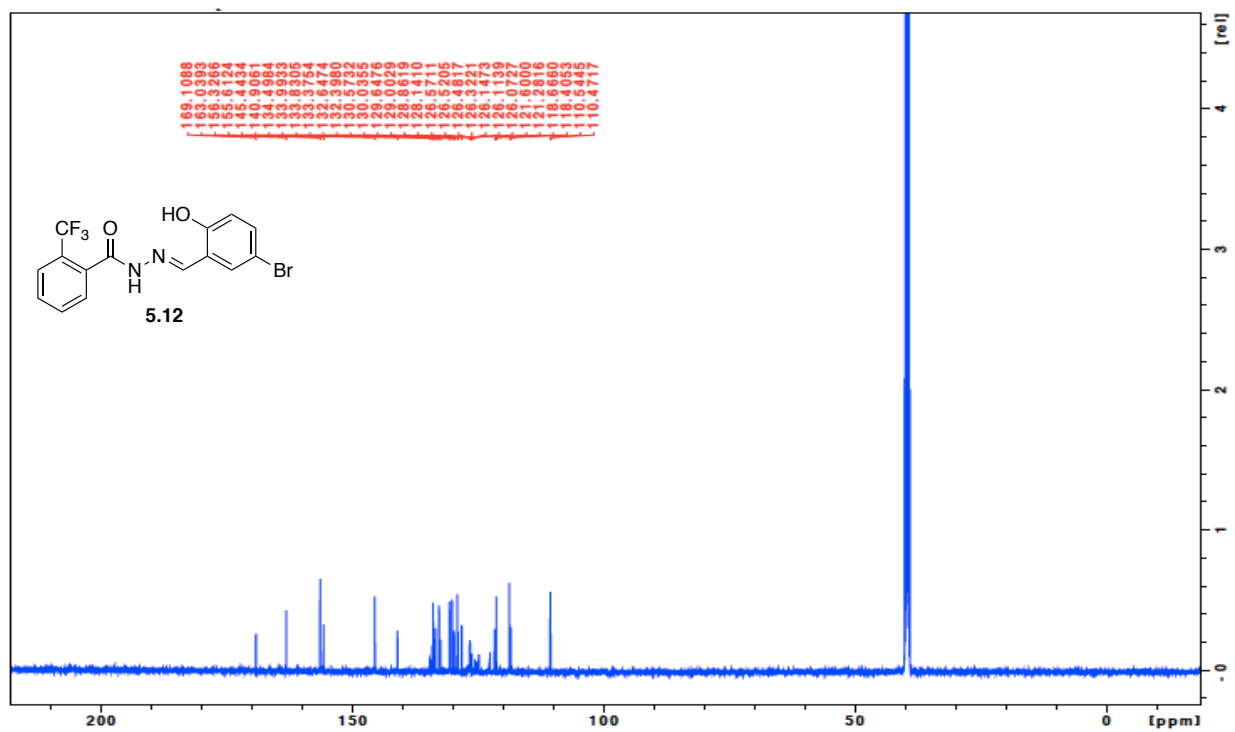

<sup>13</sup>C NMR of compound 5.12

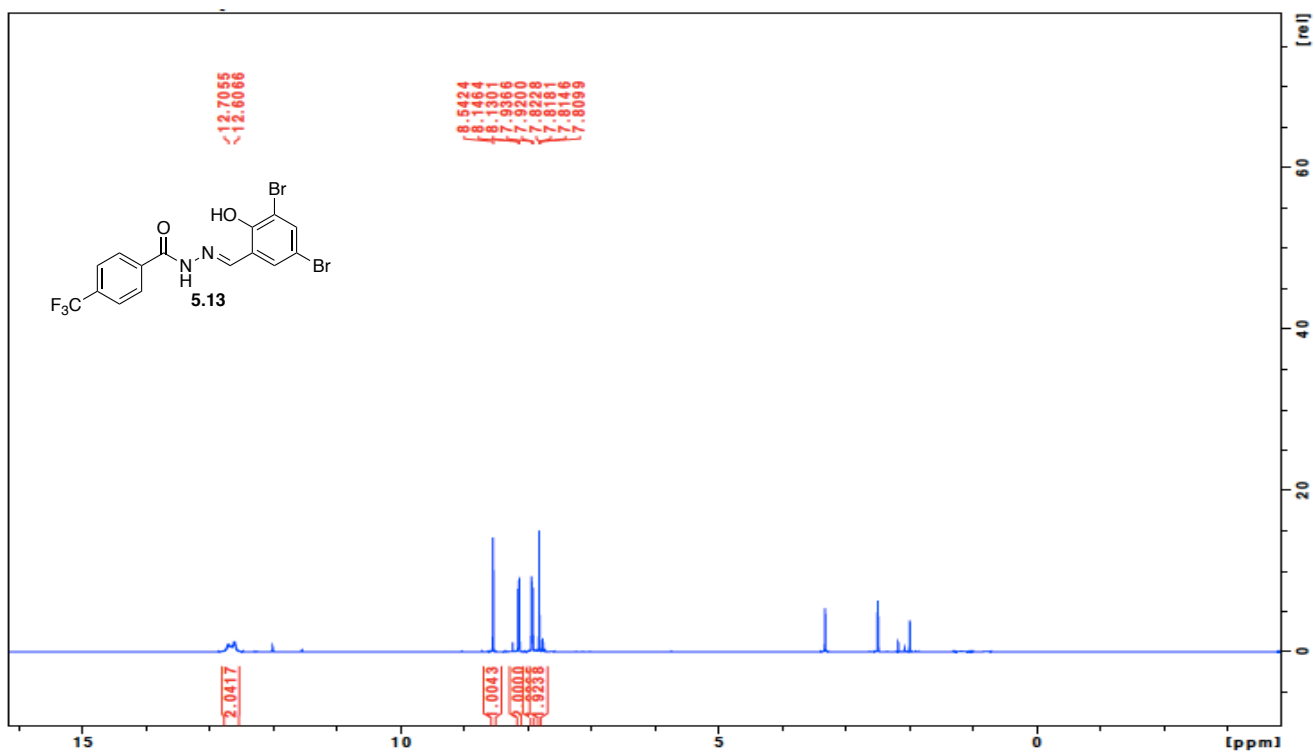

**<sup>1</sup>H NMR of compound 5.13**

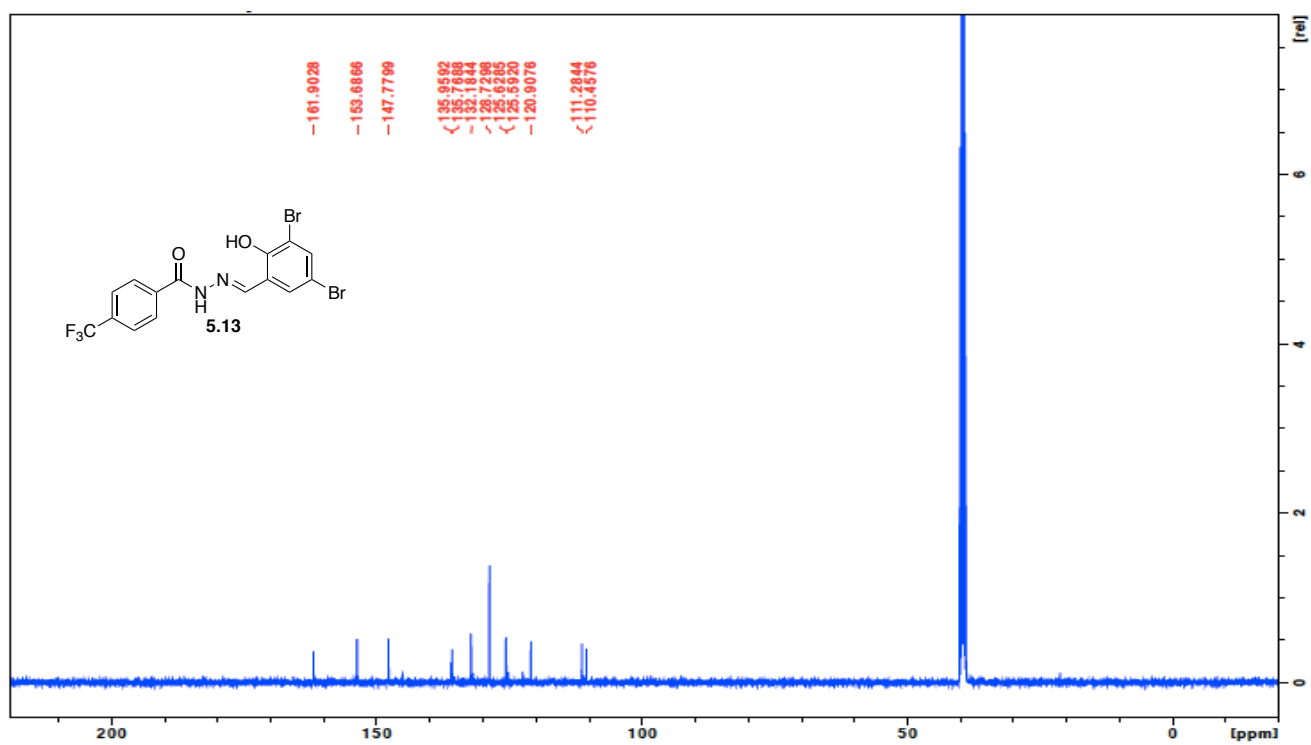

**<sup>13</sup>C NMR of compound 5.13**

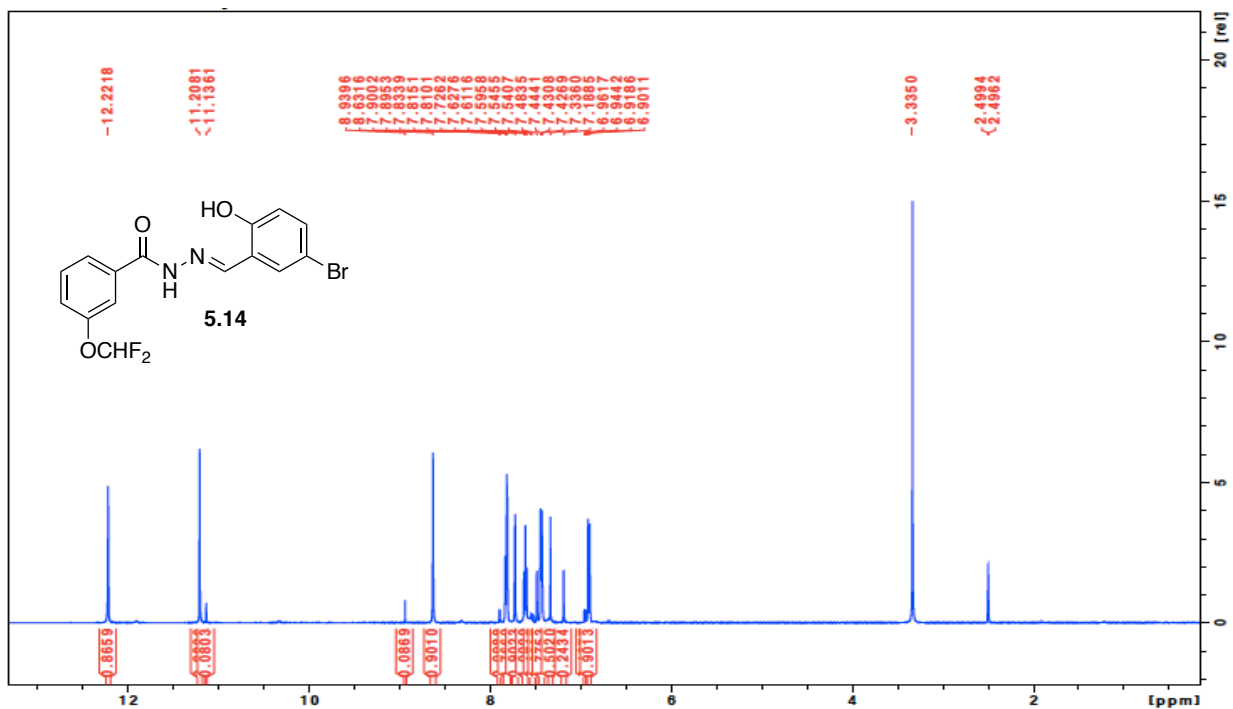

<sup>1</sup>H NMR of compound 5.14

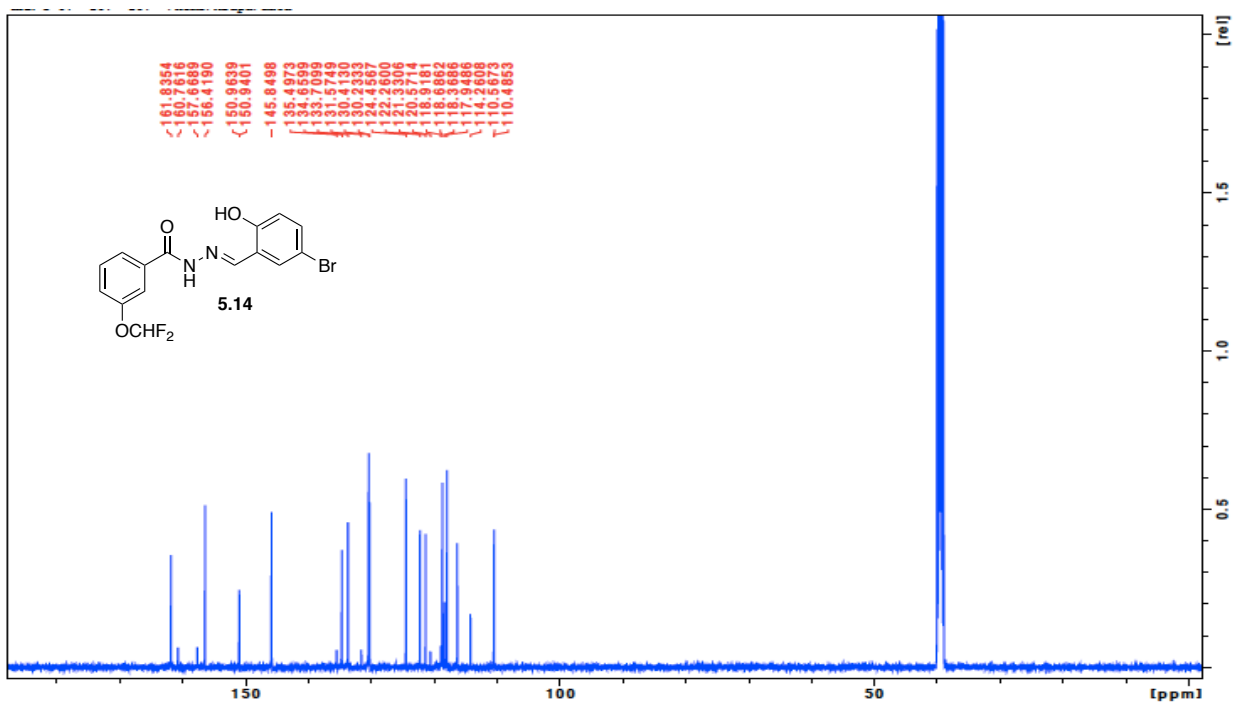

<sup>13</sup>C NMR of compound 5.14

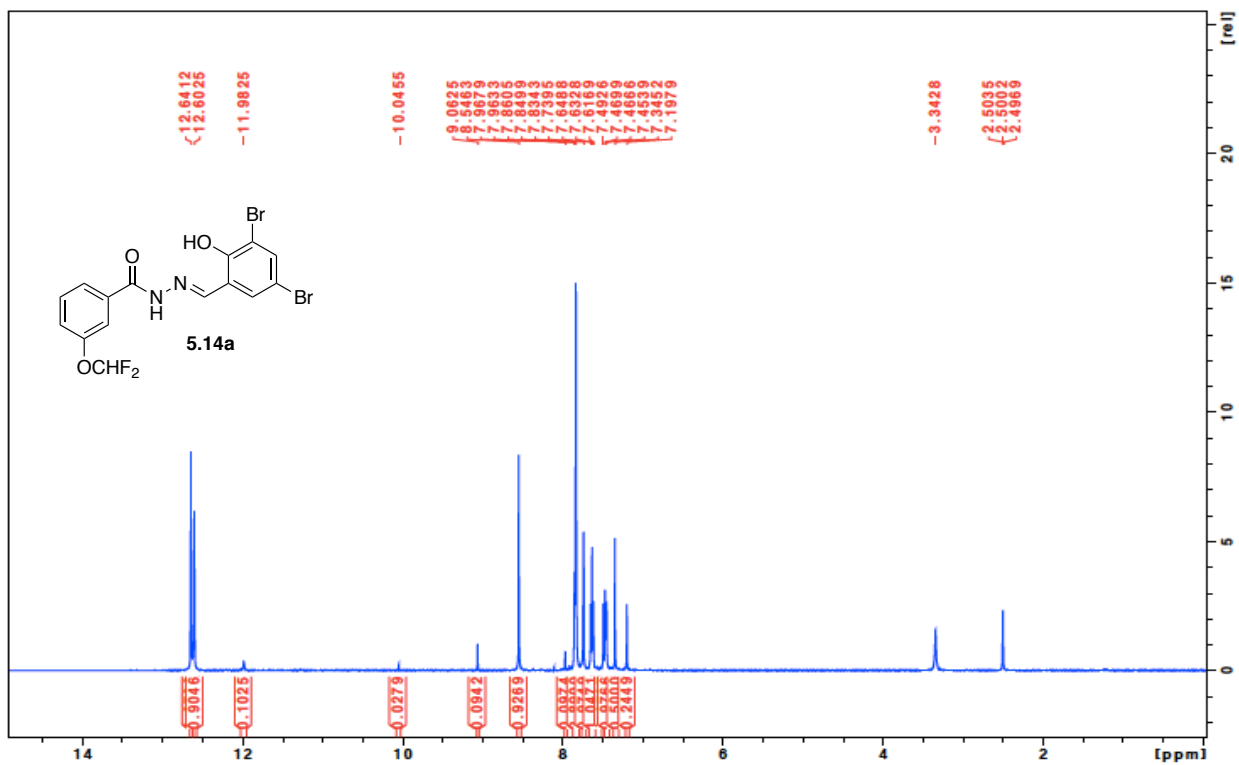

**<sup>1</sup>H NMR of compound 5.14a**

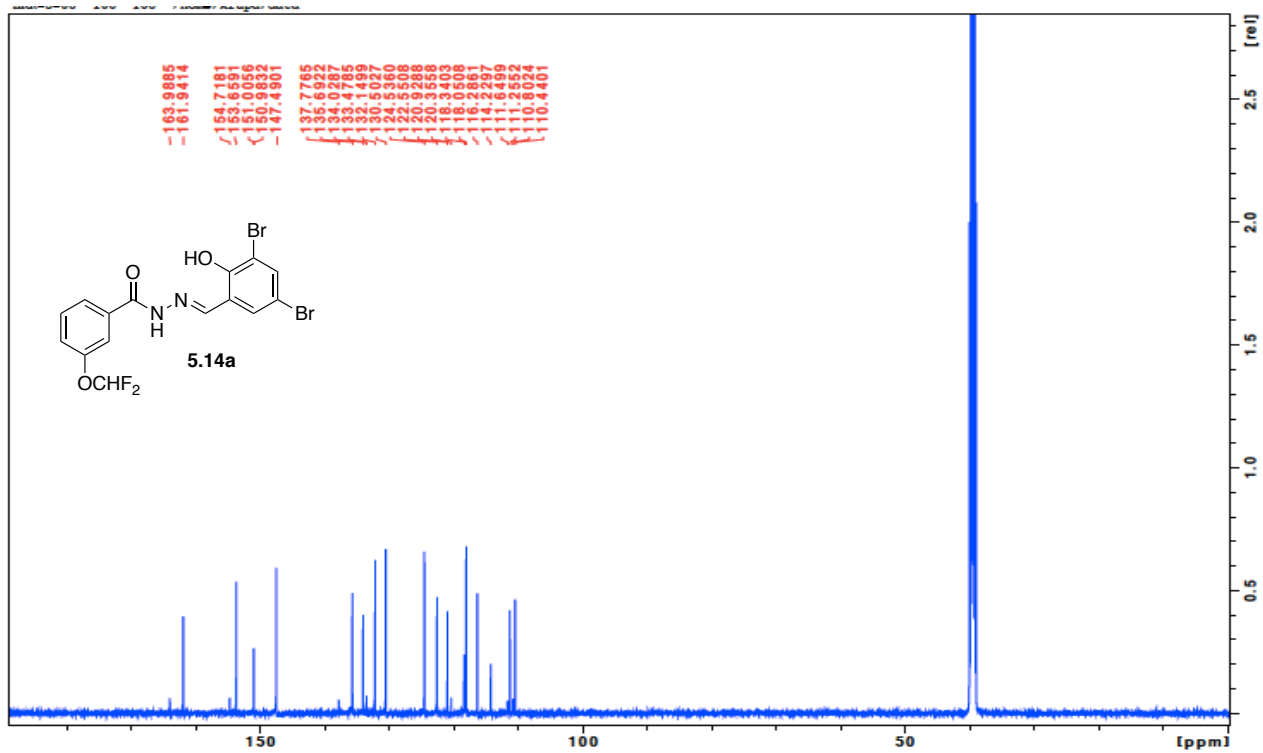

**<sup>13</sup>C NMR of compound 5.14a**

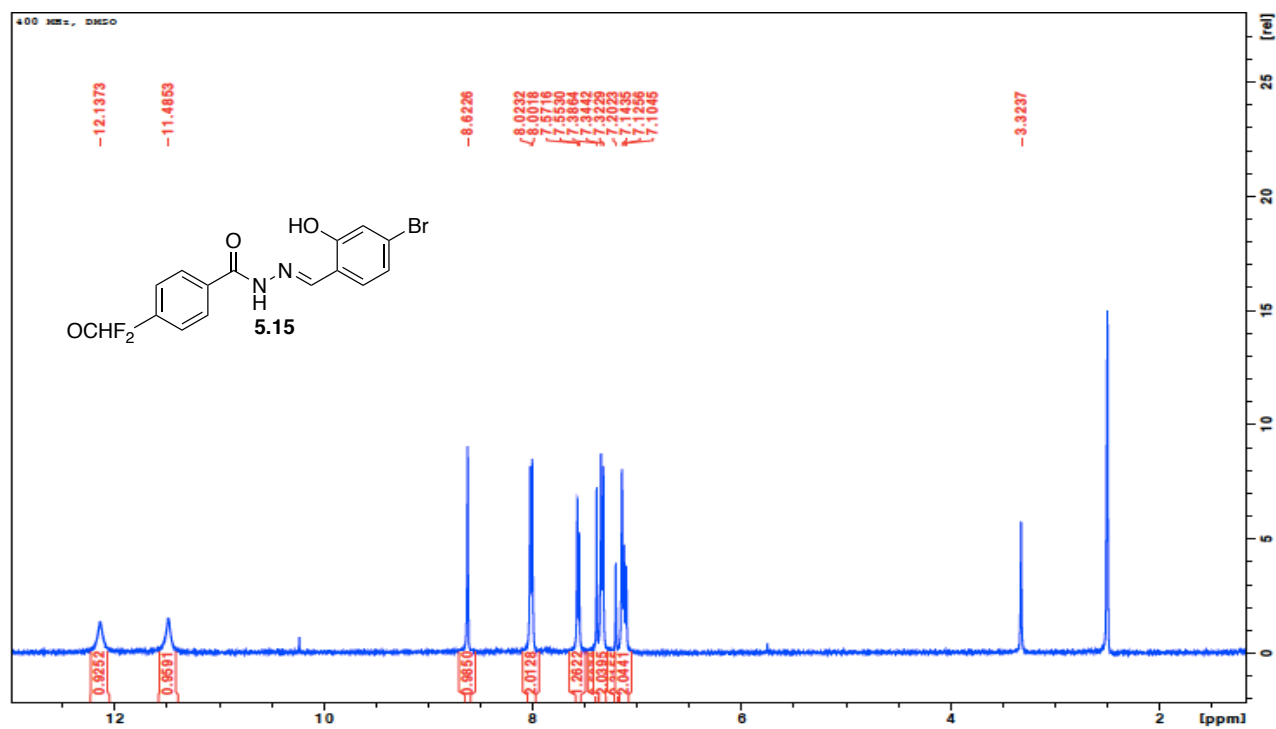

<sup>1</sup>H NMR of compound 5.15

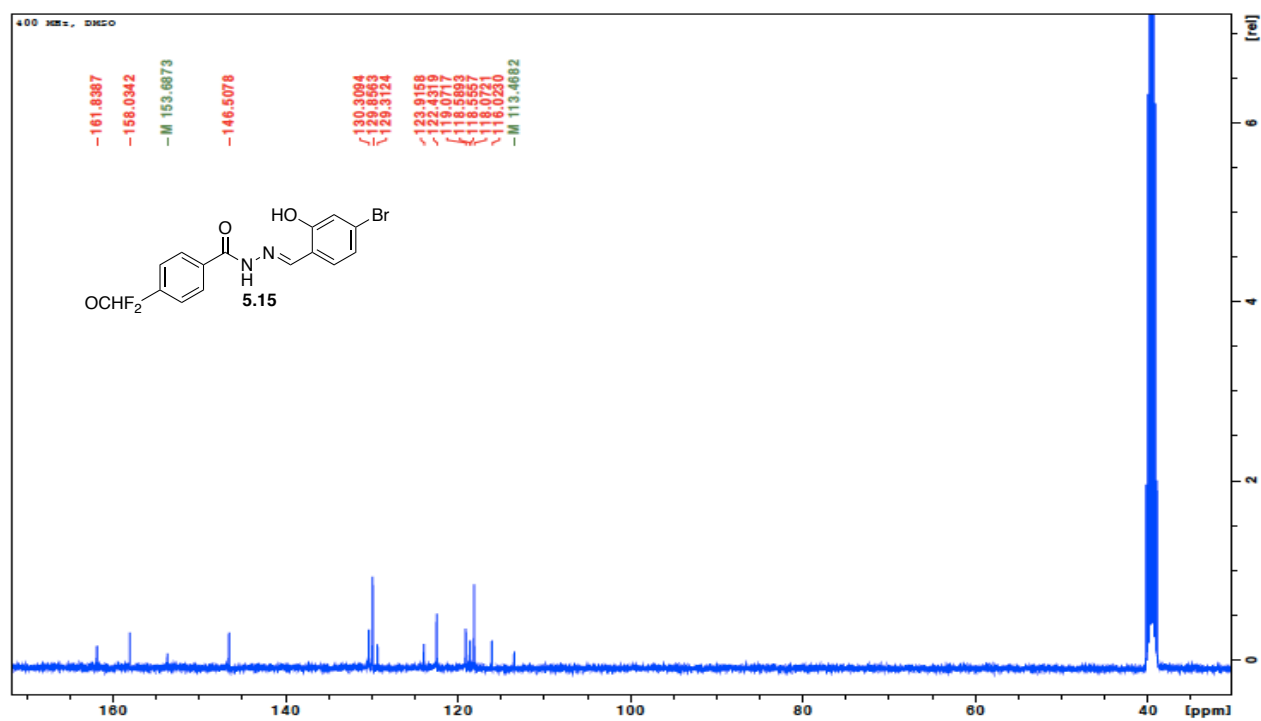

<sup>13</sup>C NMR of compound 5.15

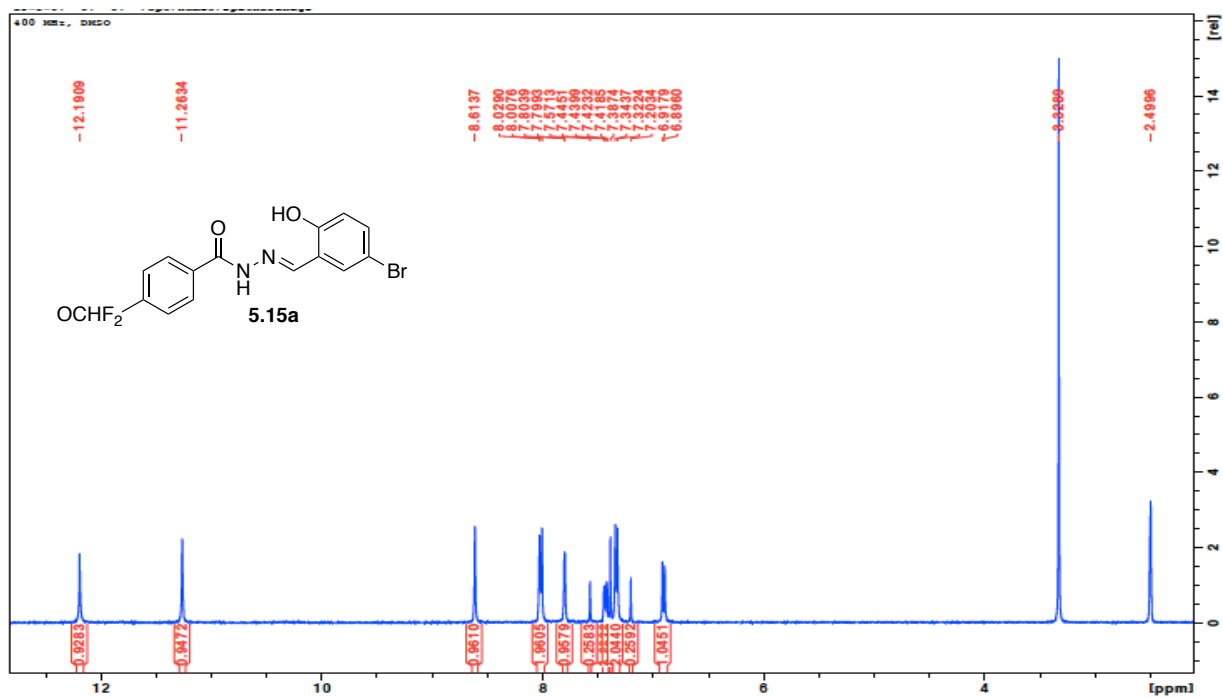

**<sup>1</sup>H NMR of compound 5.15a**

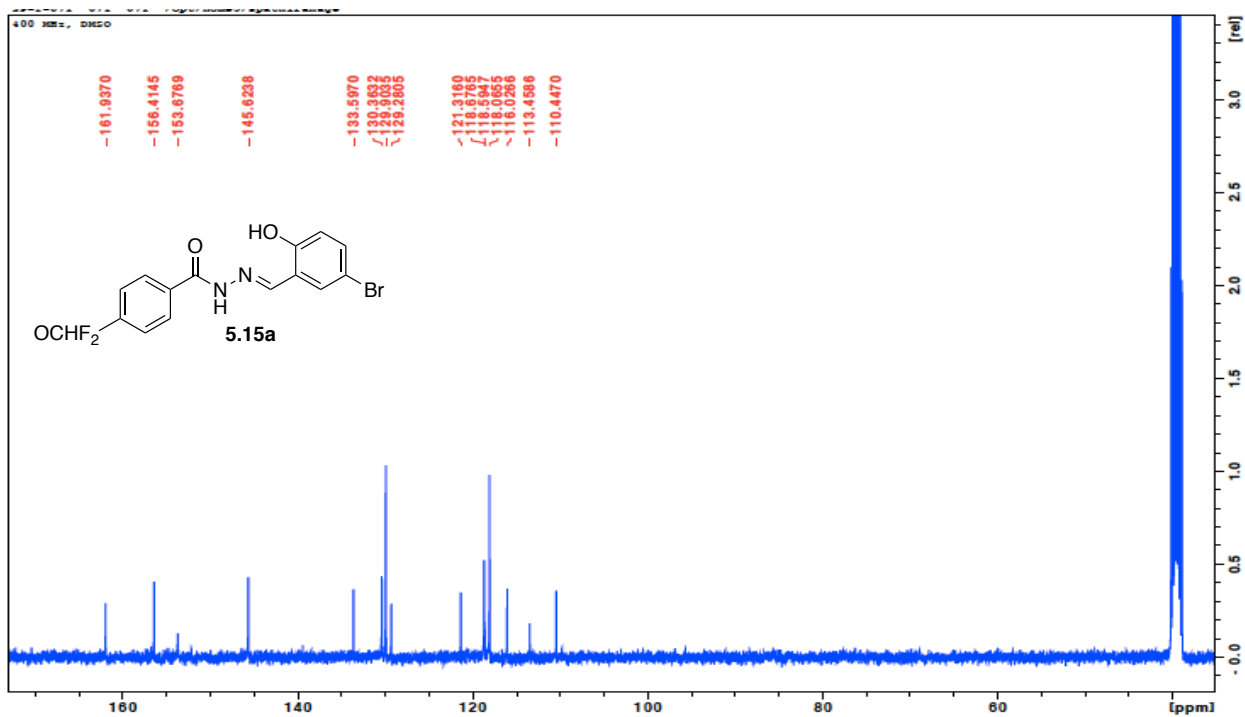

**<sup>13</sup>C NMR of compound 5.15a**

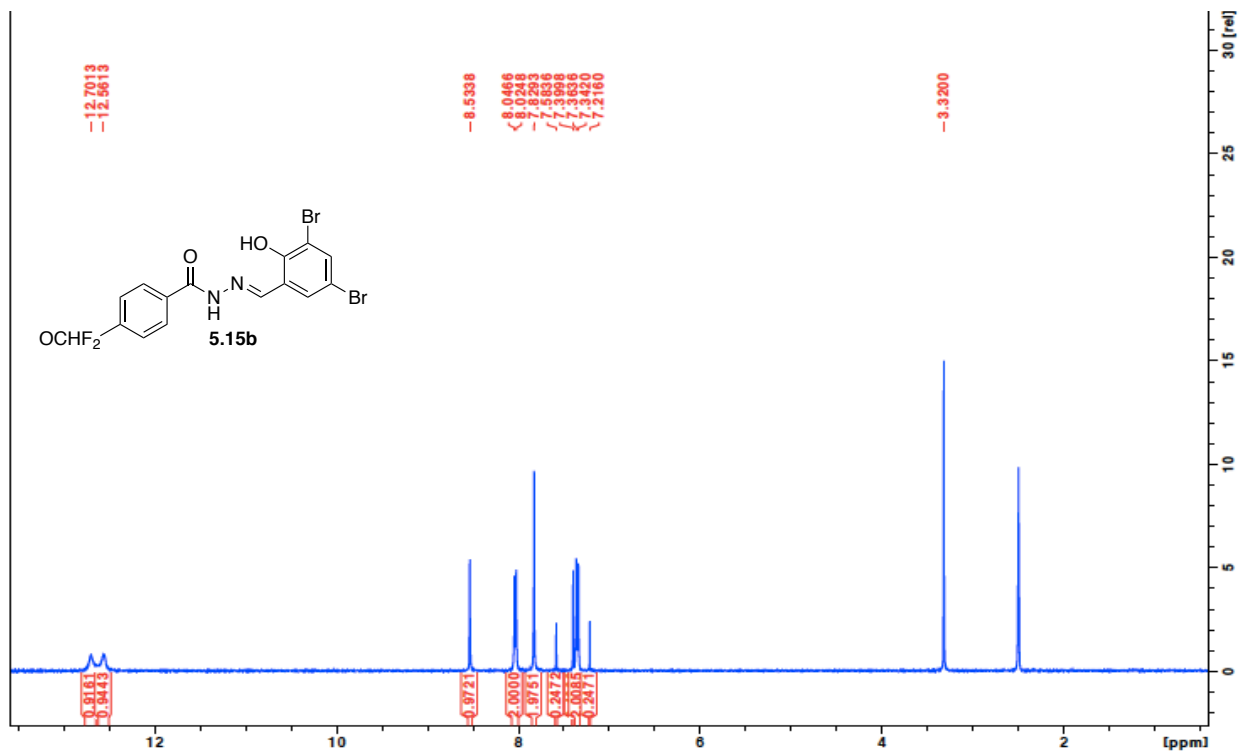

<sup>1</sup>H NMR of compound 5.15b

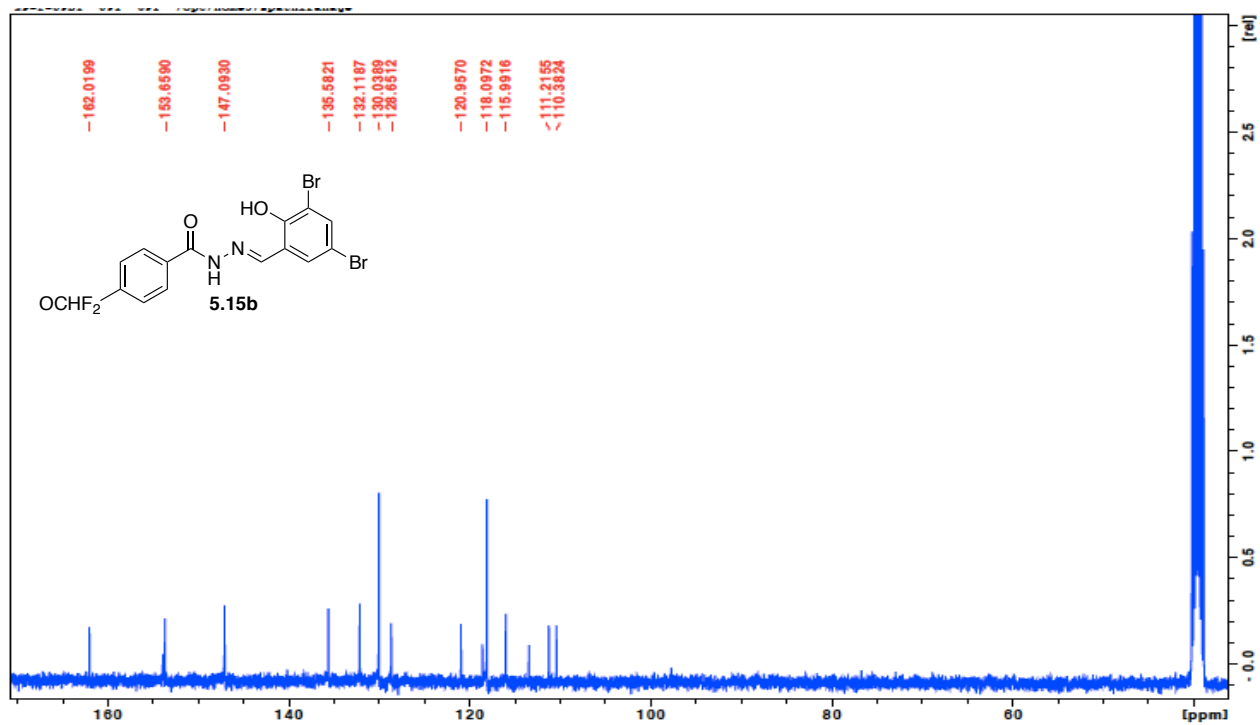

<sup>13</sup>C NMR of compound 5.15b



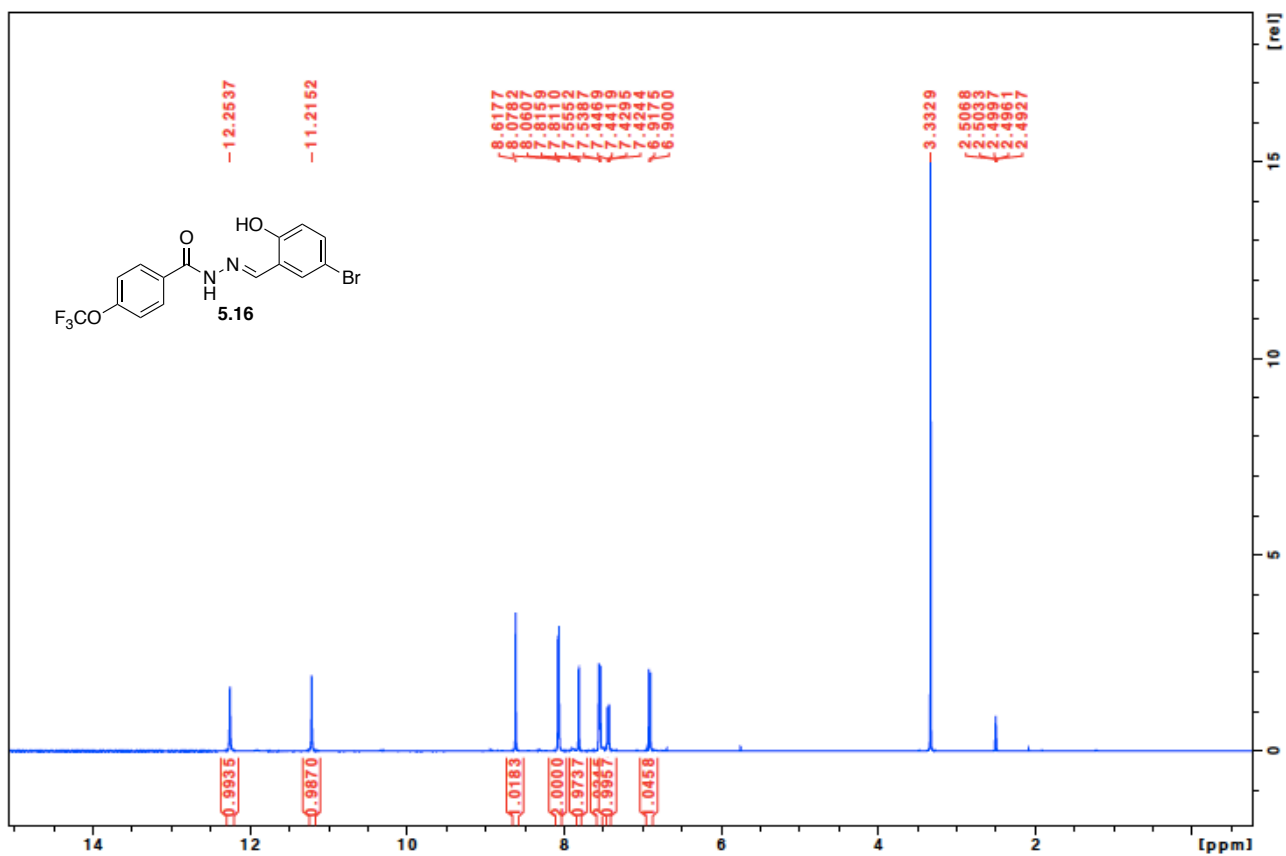

**<sup>1</sup>H NMR of compound 5.16**

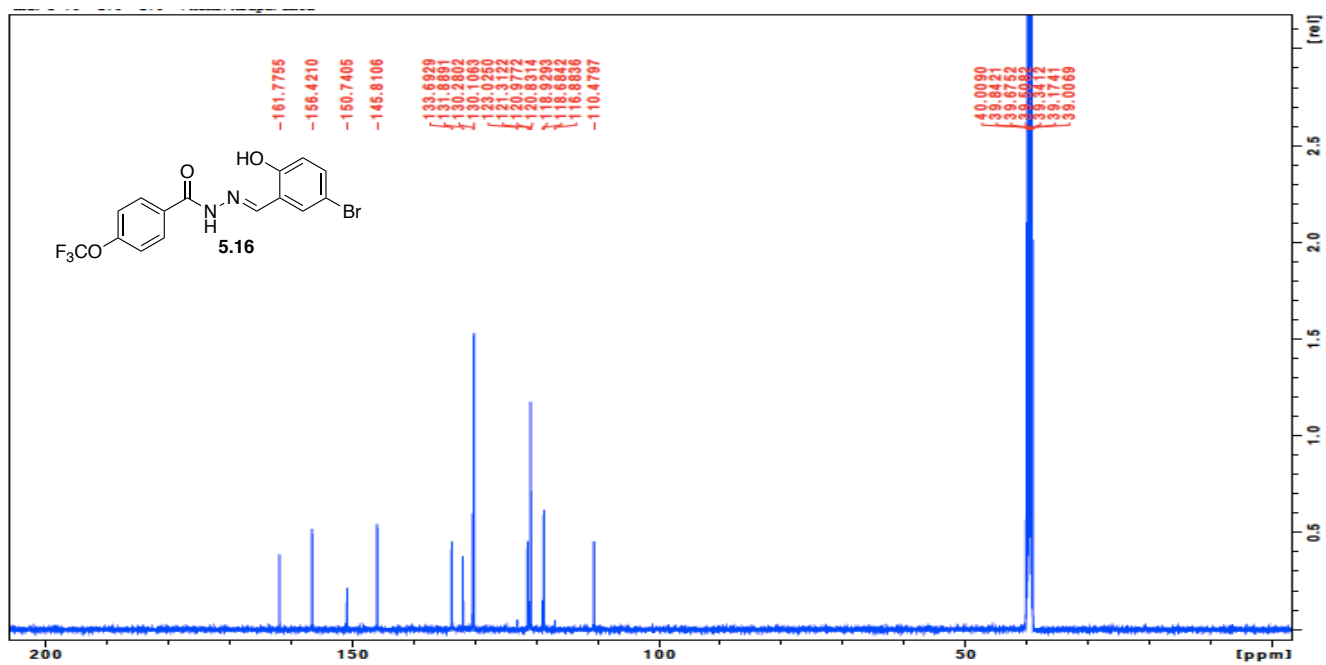

**<sup>13</sup>C NMR of compound 5.16**

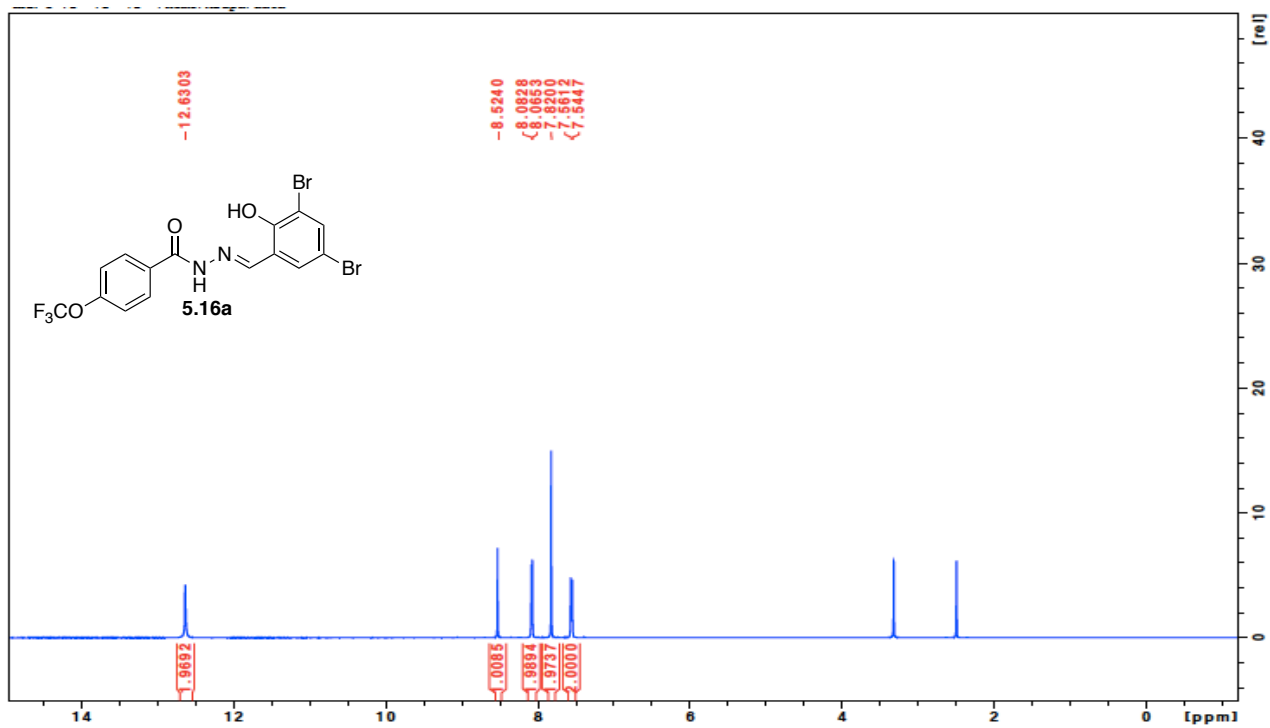

**<sup>1</sup>H NMR of compound 5.16a**

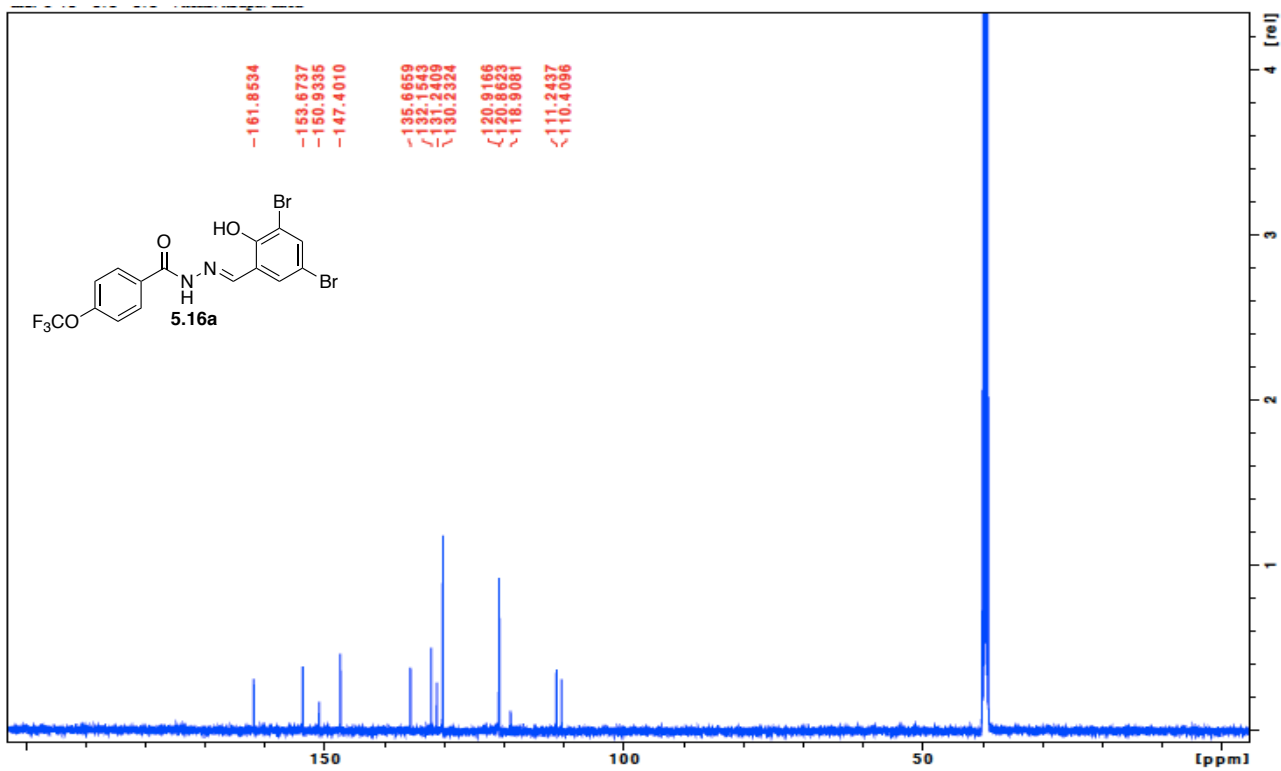

**<sup>13</sup>C NMR of compound 5.16a**



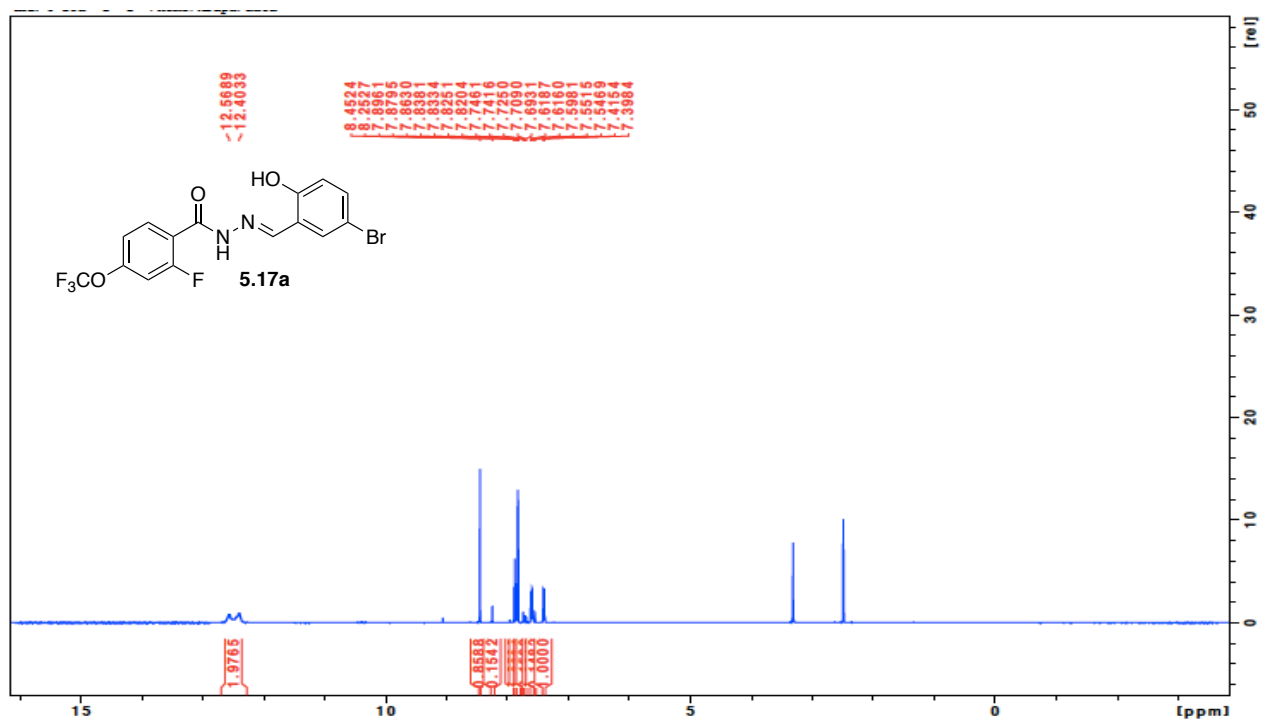

<sup>1</sup>H NMR of compound 5.17a

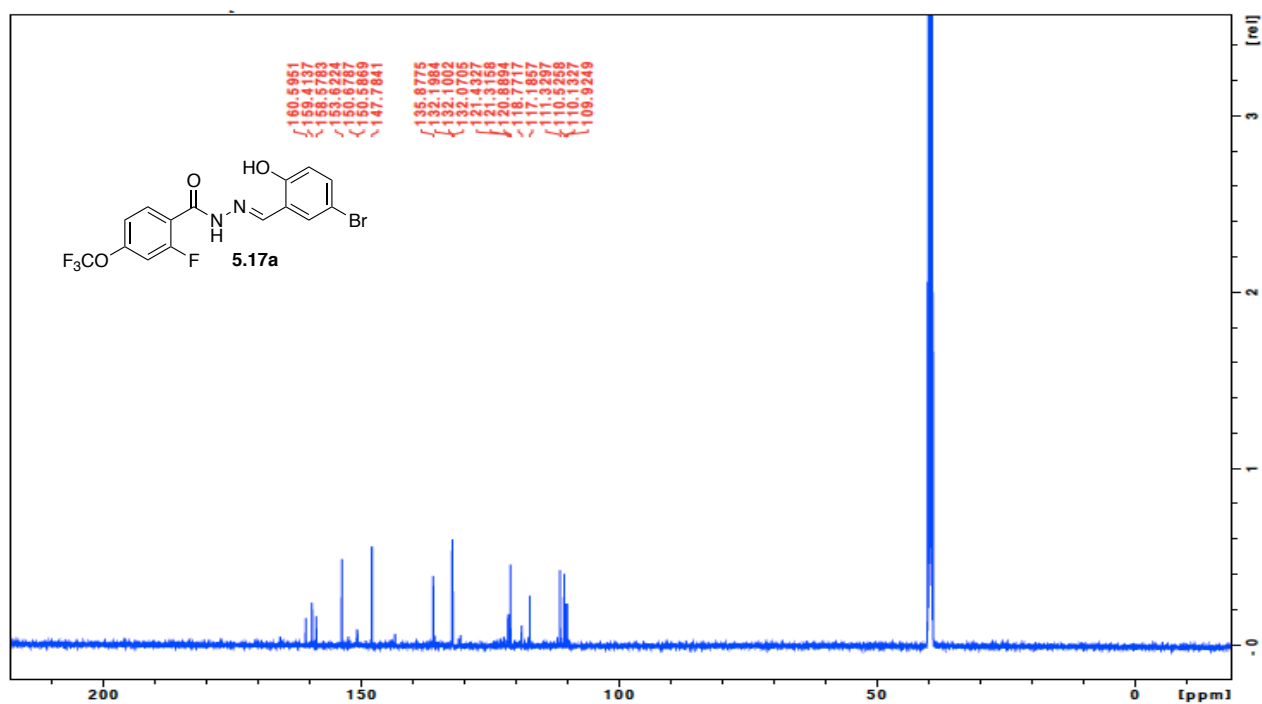

<sup>13</sup>C NMR of compound 5.17a

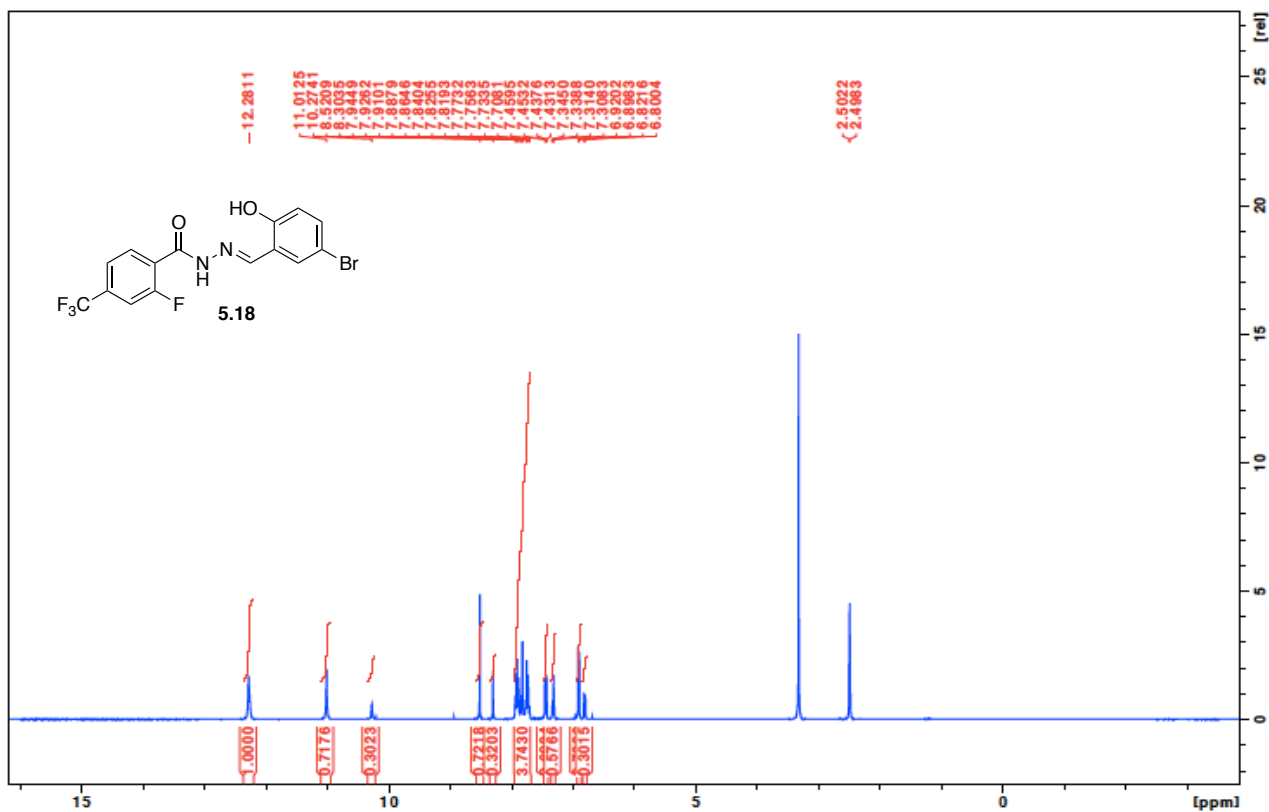

**<sup>1</sup>H NMR of compound 5.18**

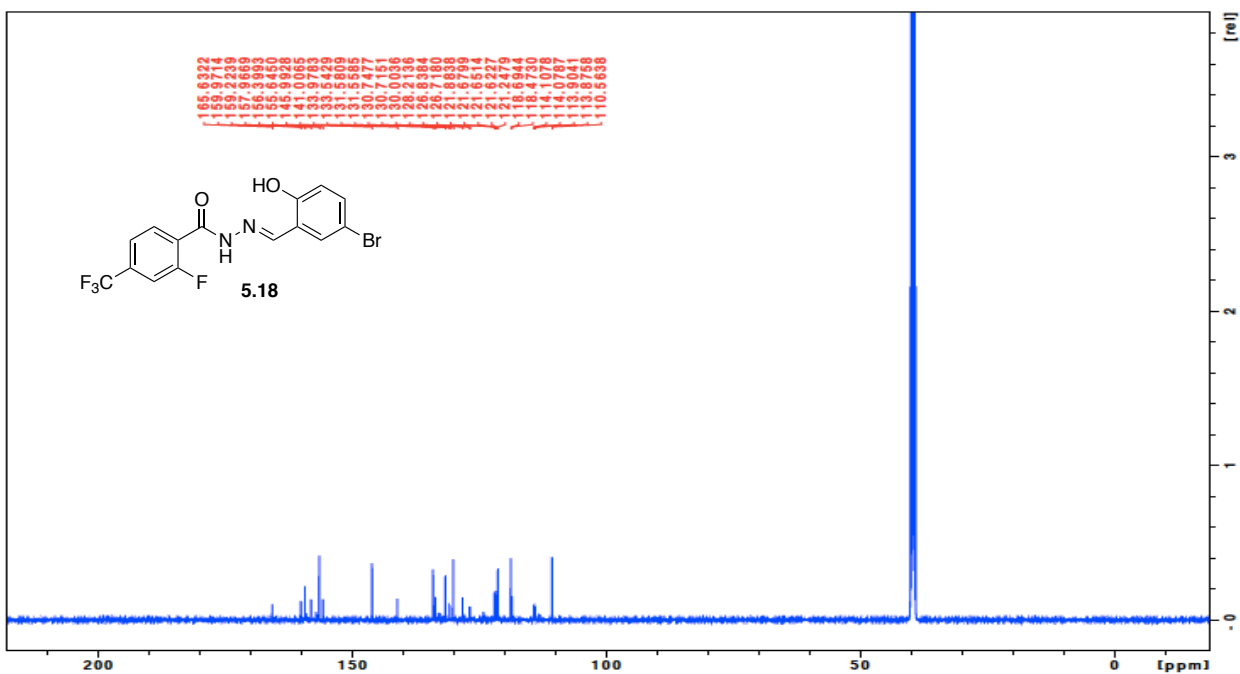

**<sup>13</sup>C NMR of compound 5.18**

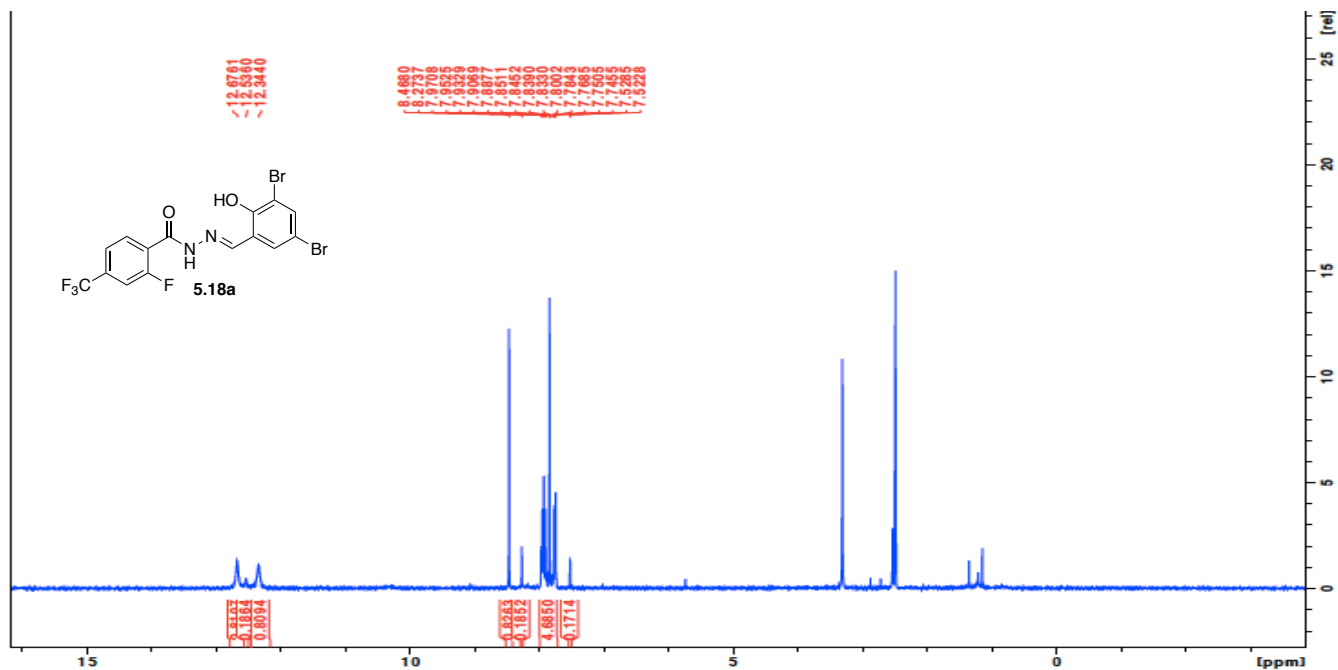

**<sup>1</sup>H NMR of compound 5.18a**

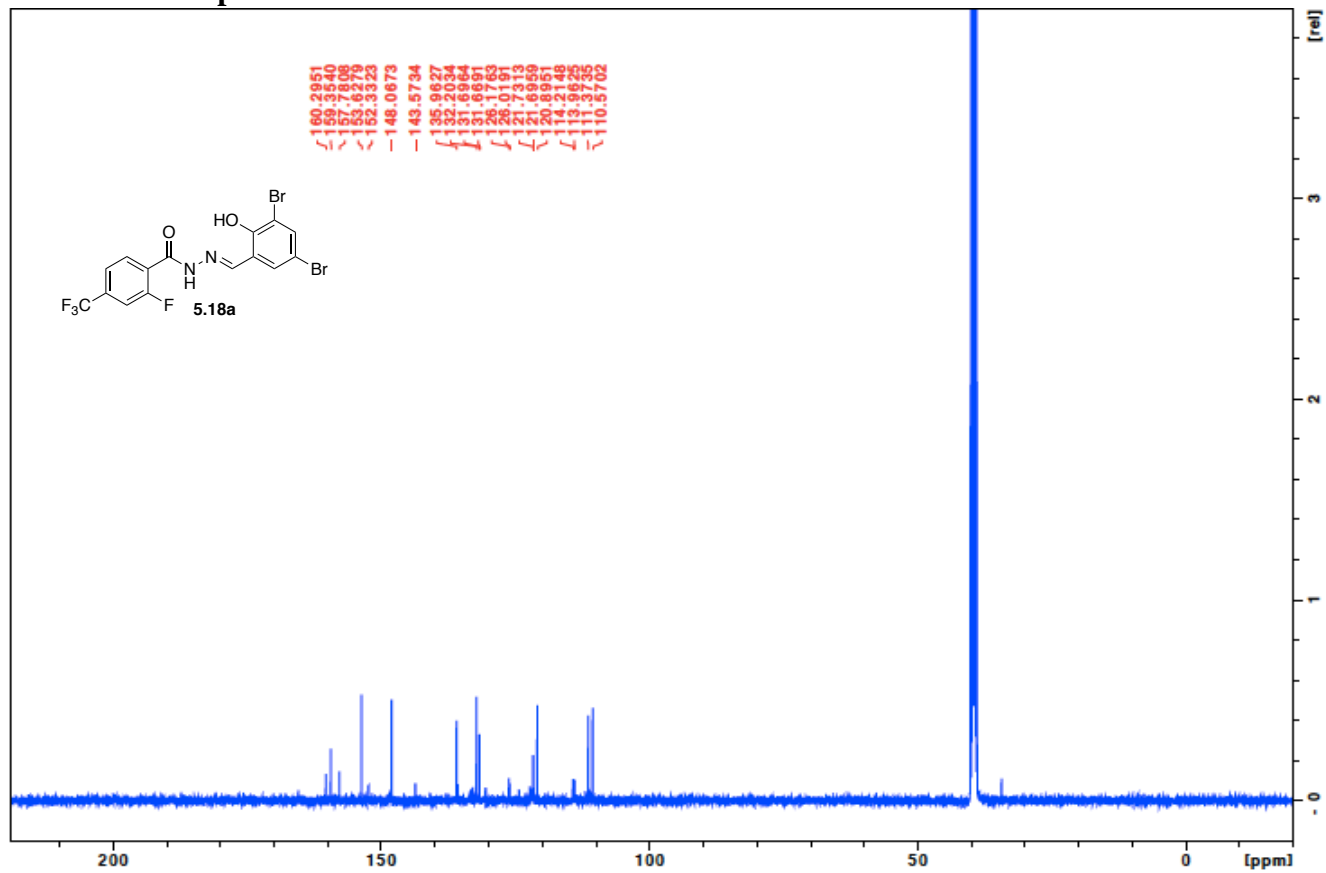

**<sup>13</sup>C NMR of compound 5.18a**

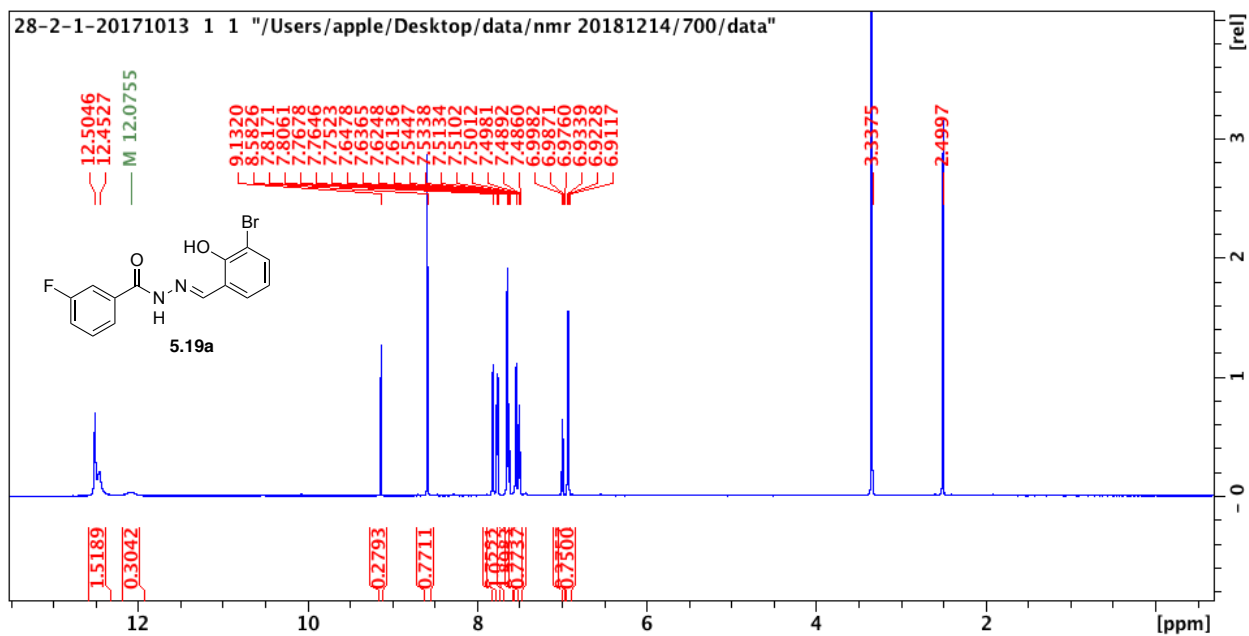

<sup>1</sup>H NMR of compound 5.19a

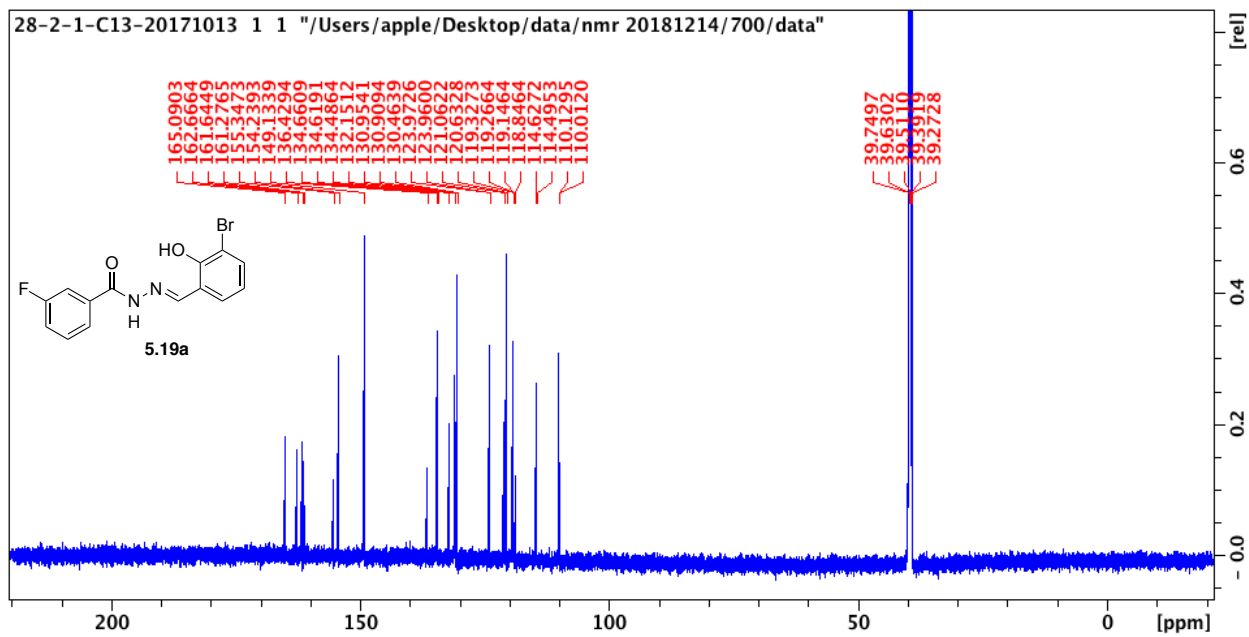

<sup>13</sup>C NMR of compound 5.19a

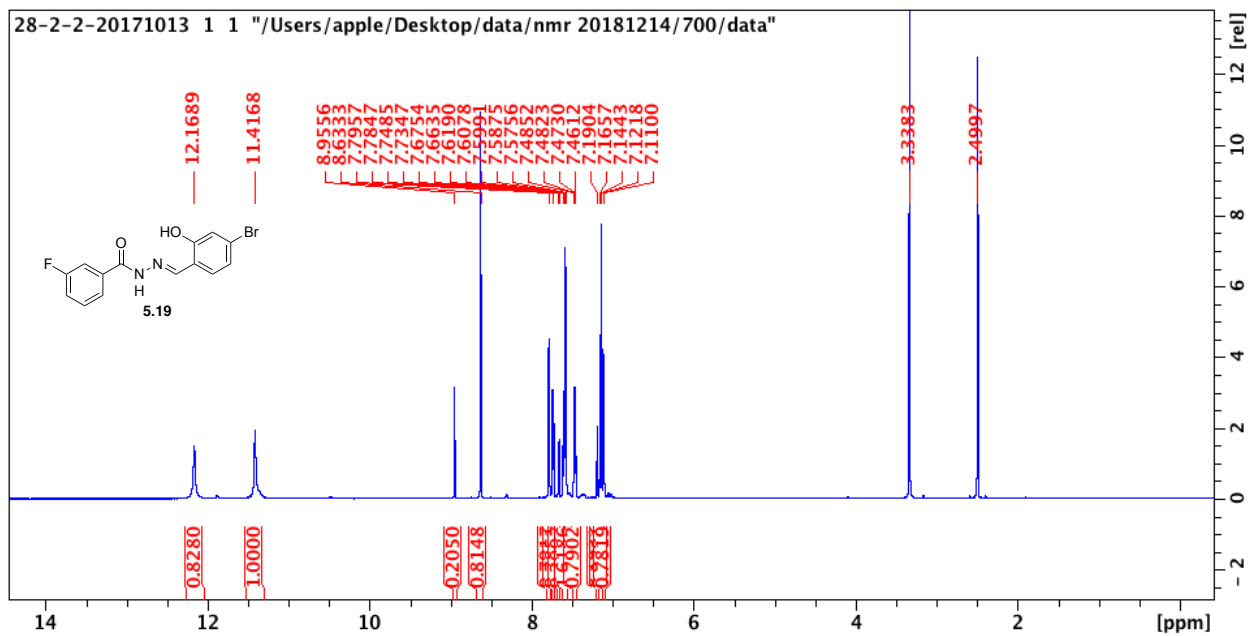

<sup>1</sup>H NMR of compound 5.19

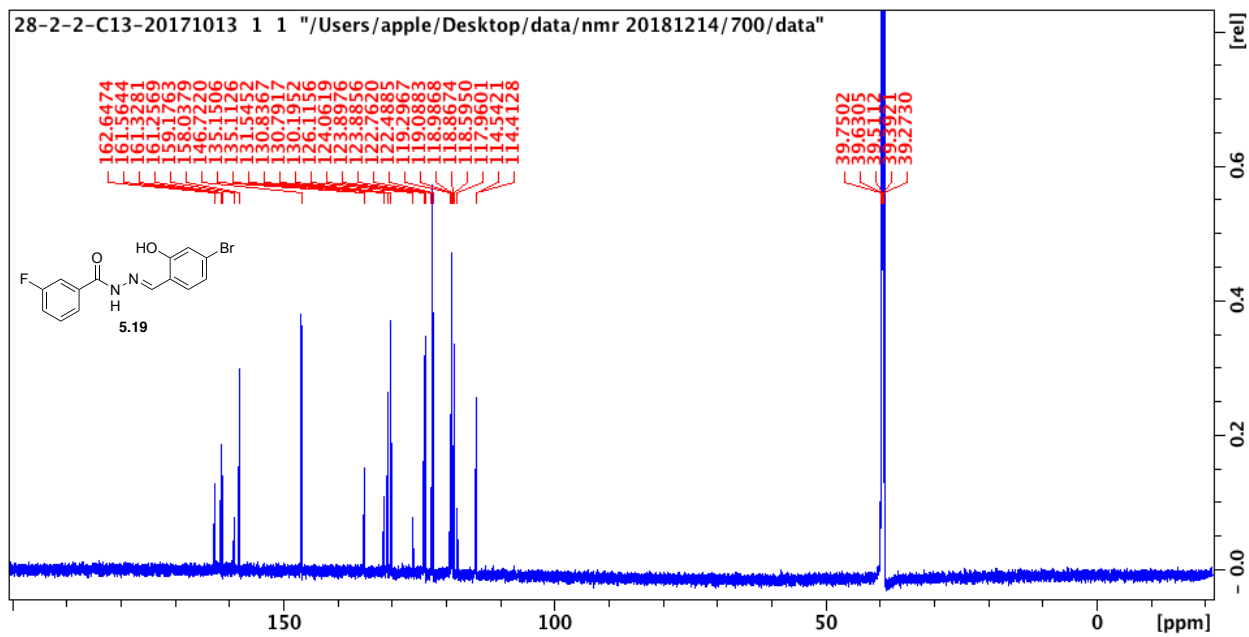

<sup>13</sup>C NMR of compound 5.19



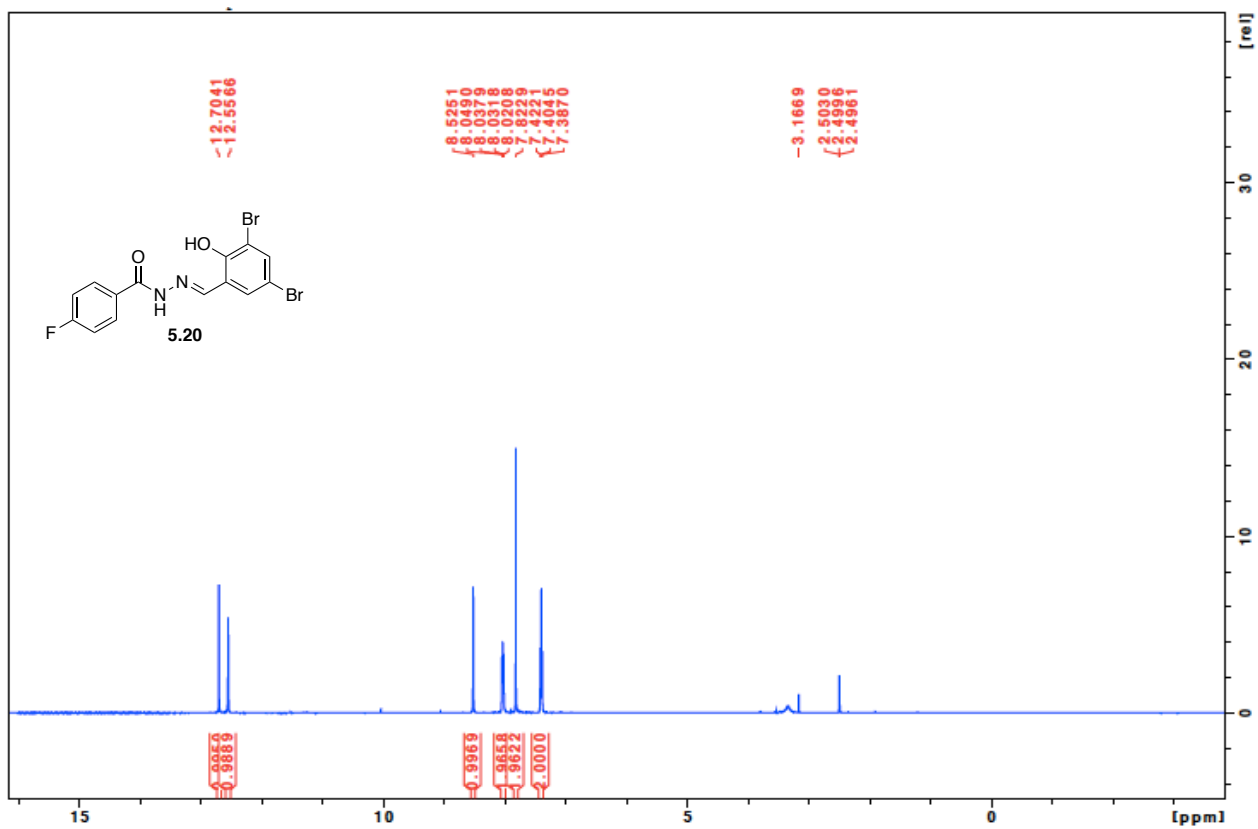

**<sup>1</sup>H NMR of compound 5.20**

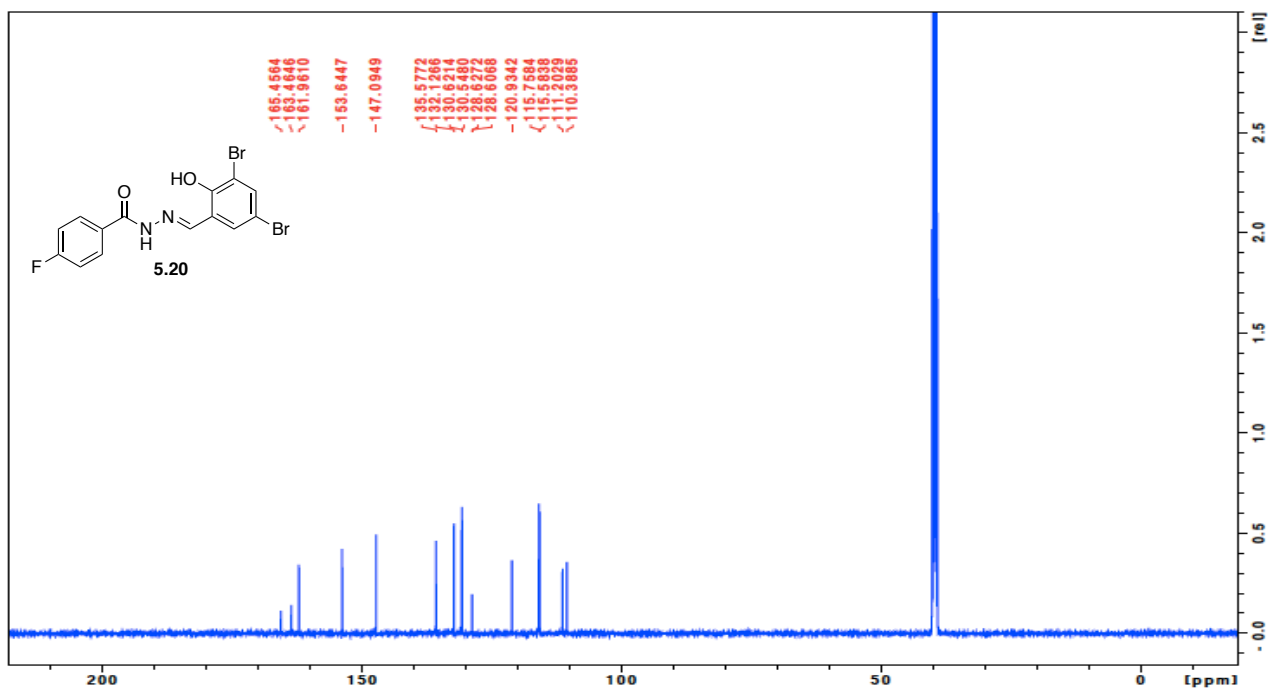

**<sup>13</sup>C NMR of compound 5.20**

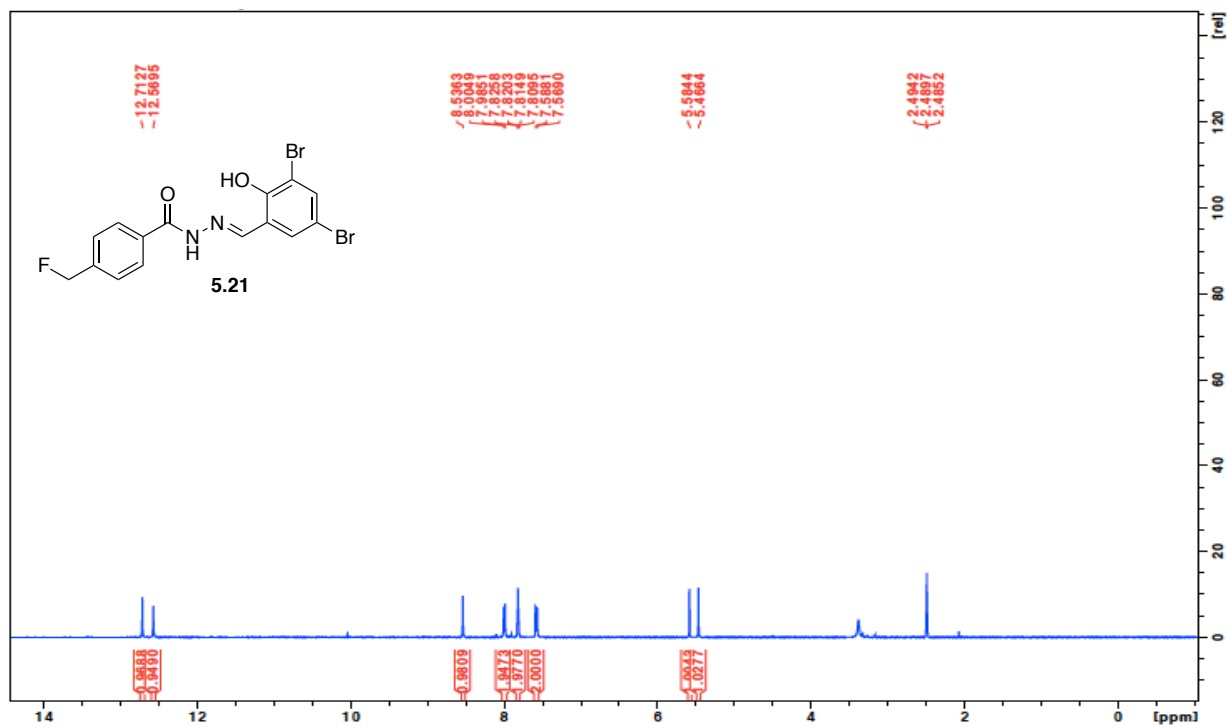

**<sup>1</sup>H NMR of compound 5.21**

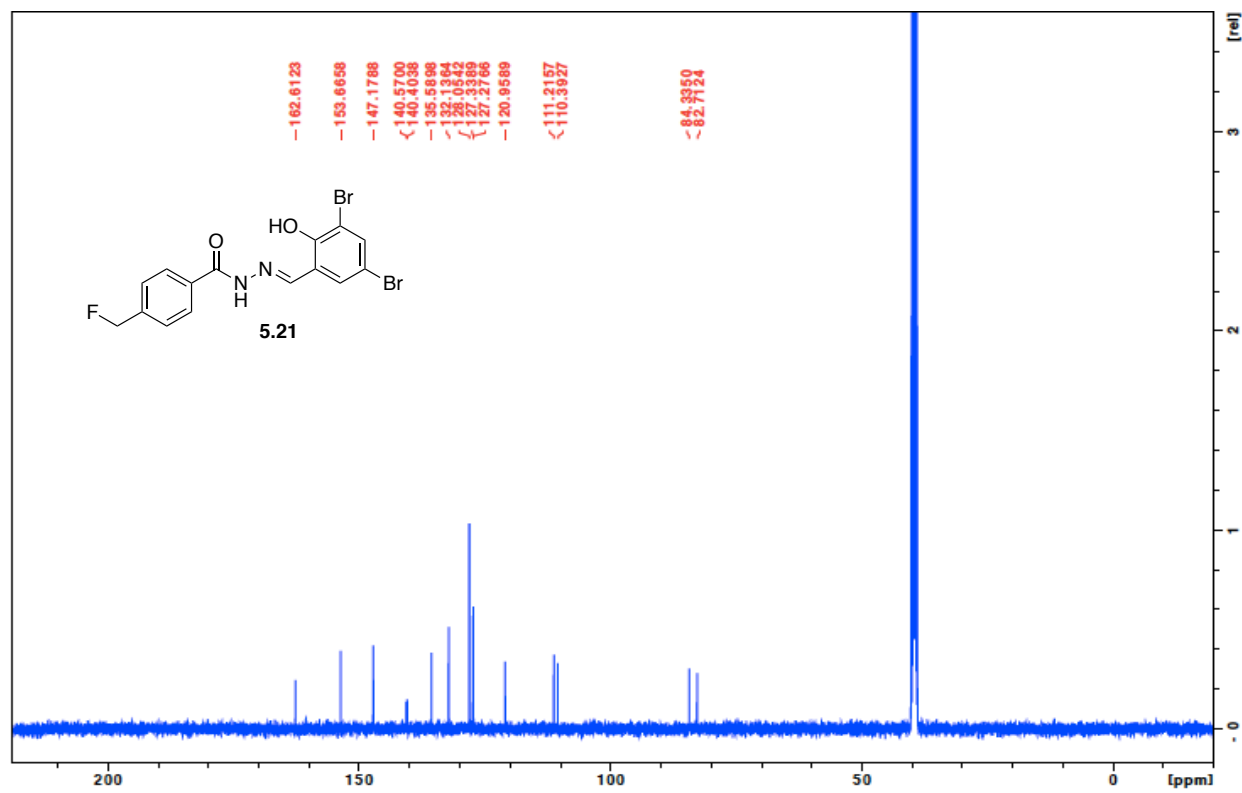

**<sup>13</sup>C NMR of compound 5.21**

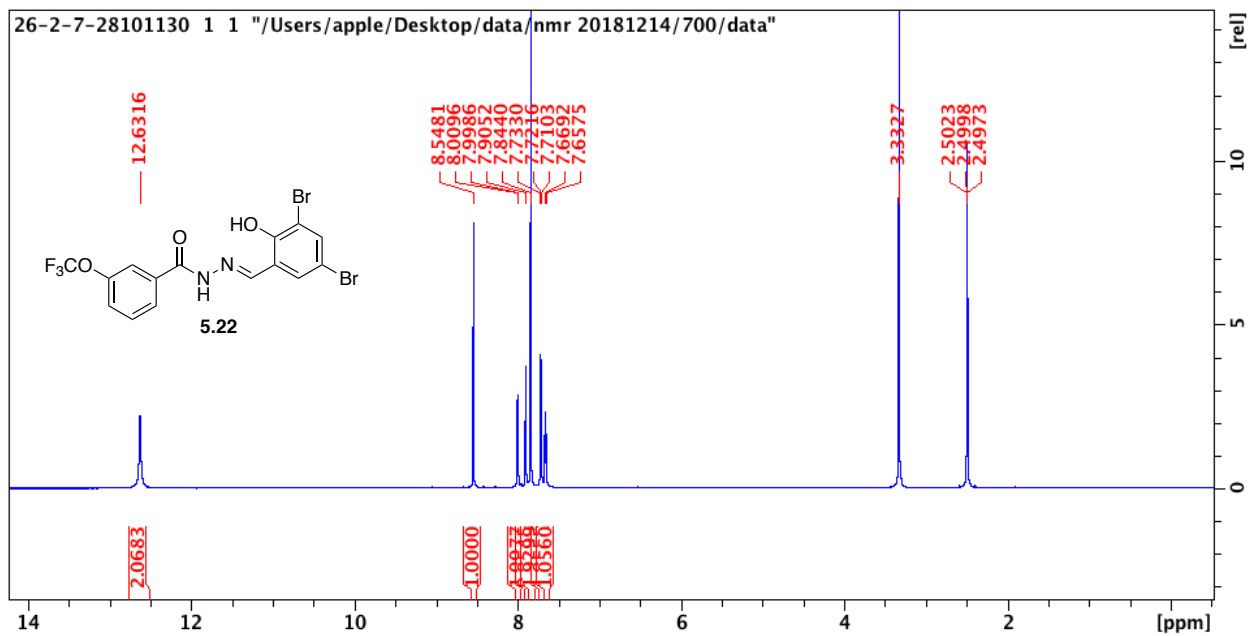

<sup>1</sup>H NMR of compound 5.22

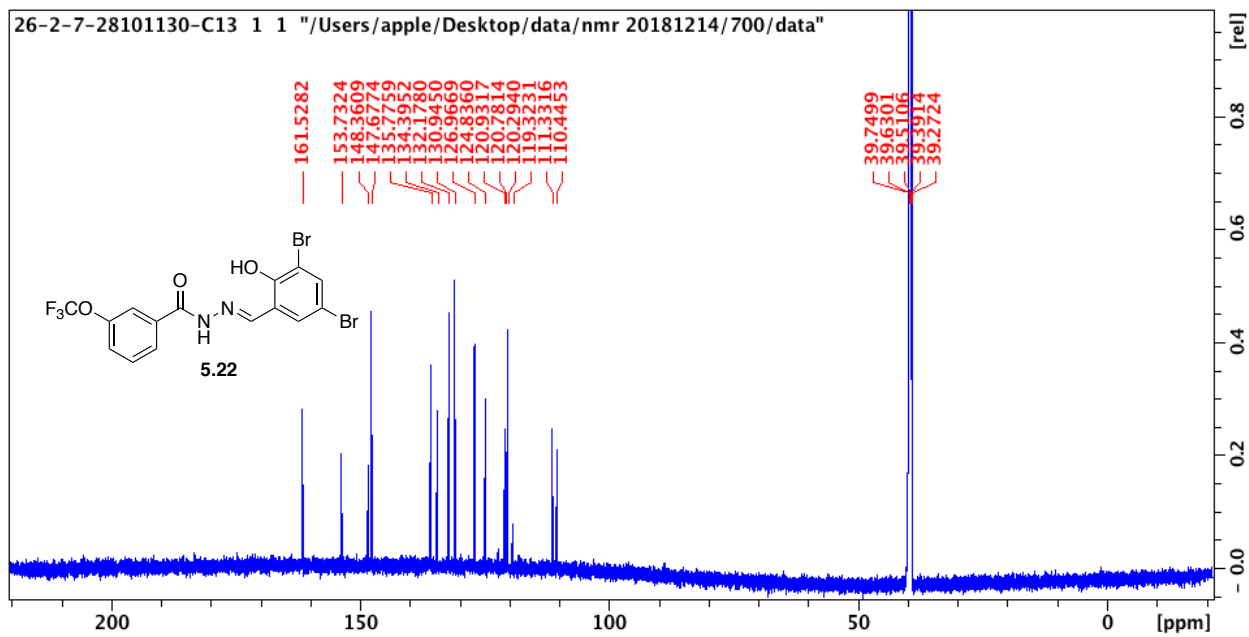

<sup>13</sup>C NMR of compound 5.22

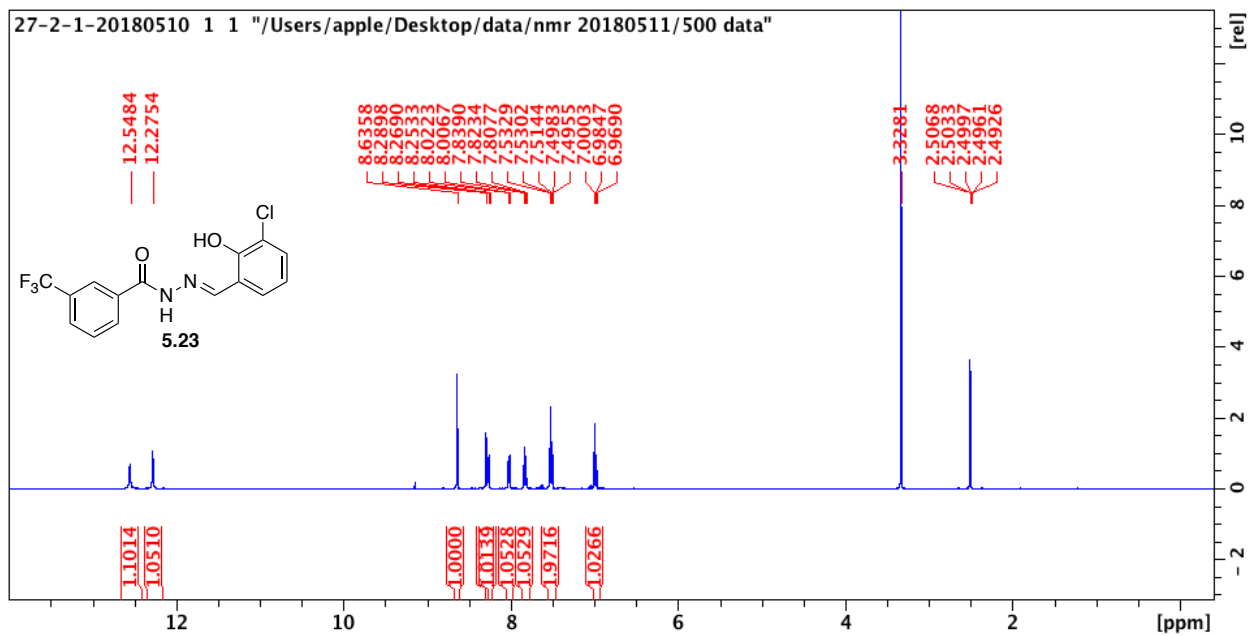

**<sup>1</sup>H NMR of compound 5.23**

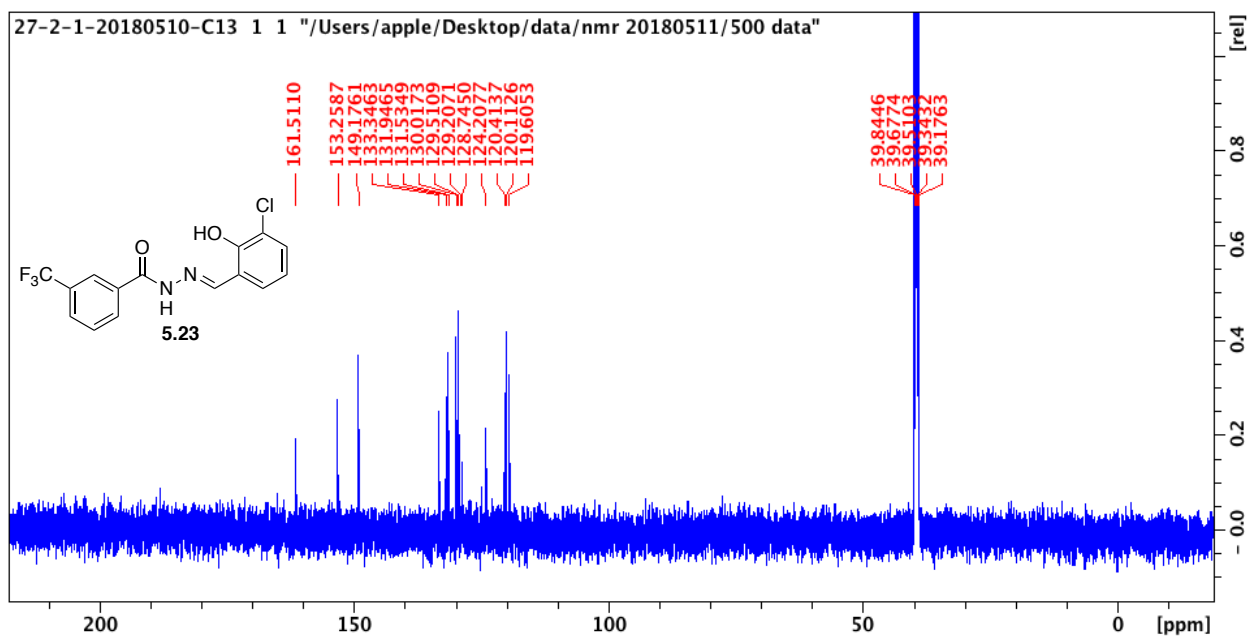

**<sup>13</sup>C NMR of compound 5.23**

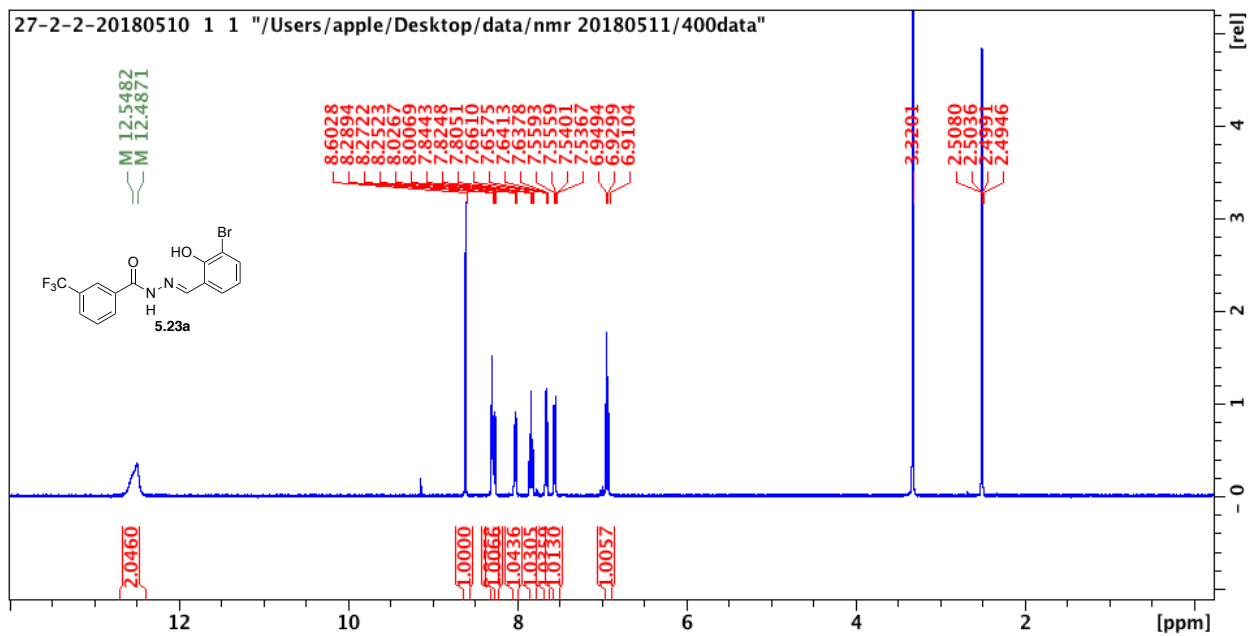

<sup>1</sup>H NMR of compound 5.23a

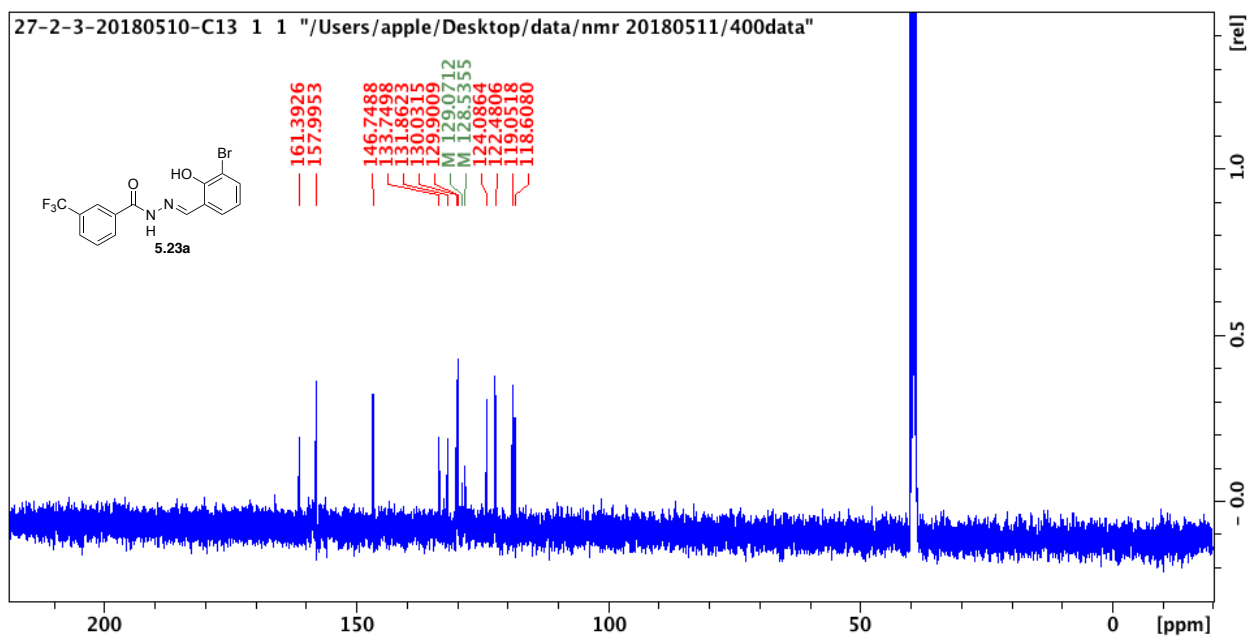

<sup>13</sup>C NMR of compound 5.23a

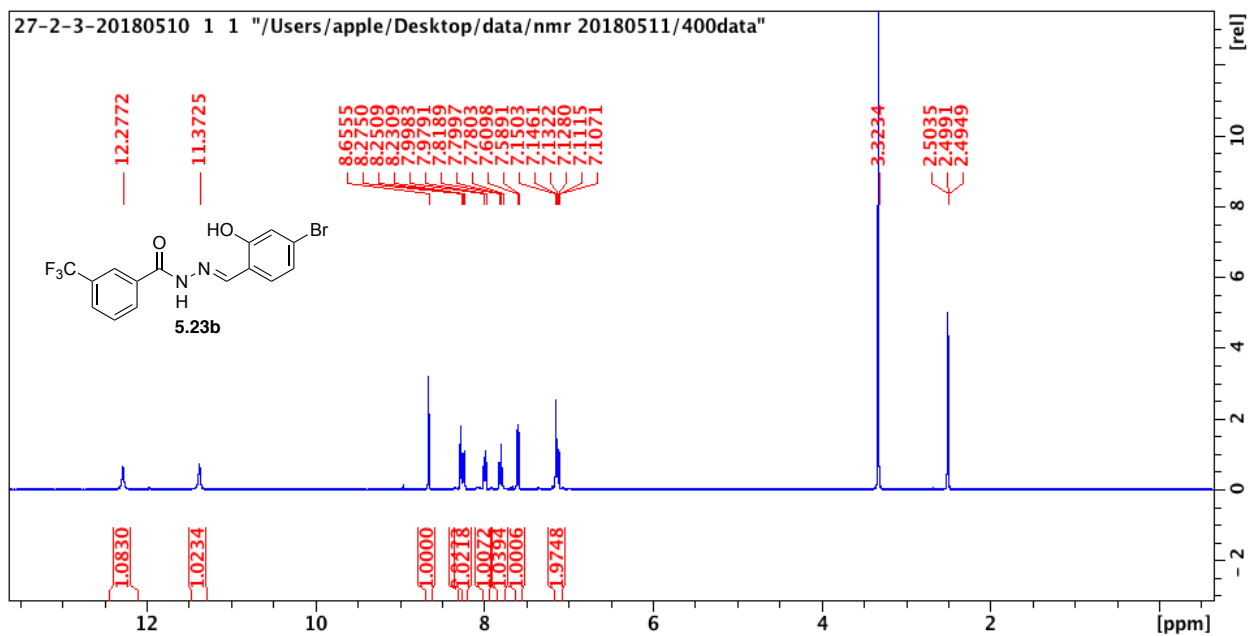

<sup>1</sup>H NMR of compound 5.23b

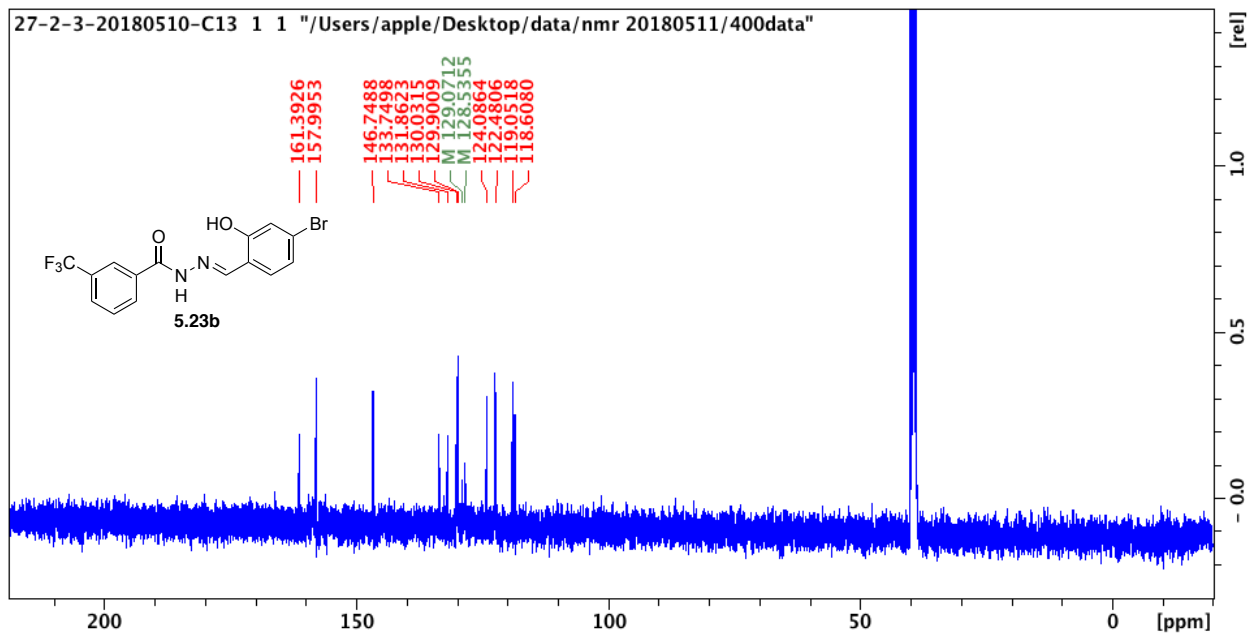

<sup>13</sup>C NMR of compound 5.23b

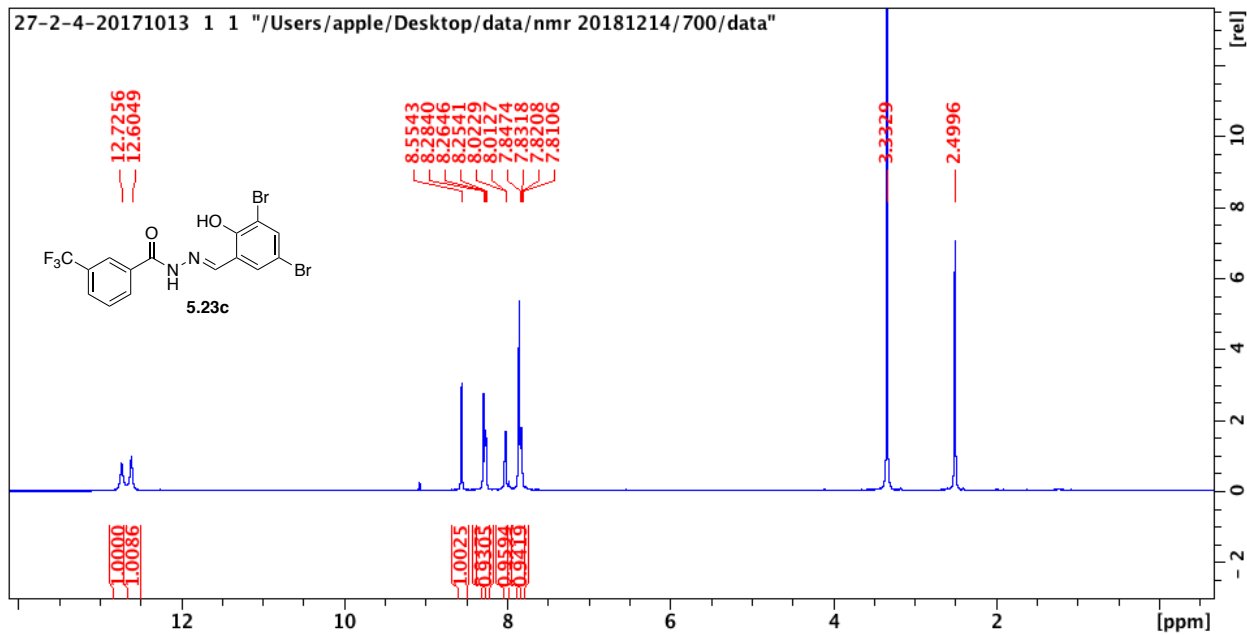

<sup>1</sup>H NMR of compound 5.23c

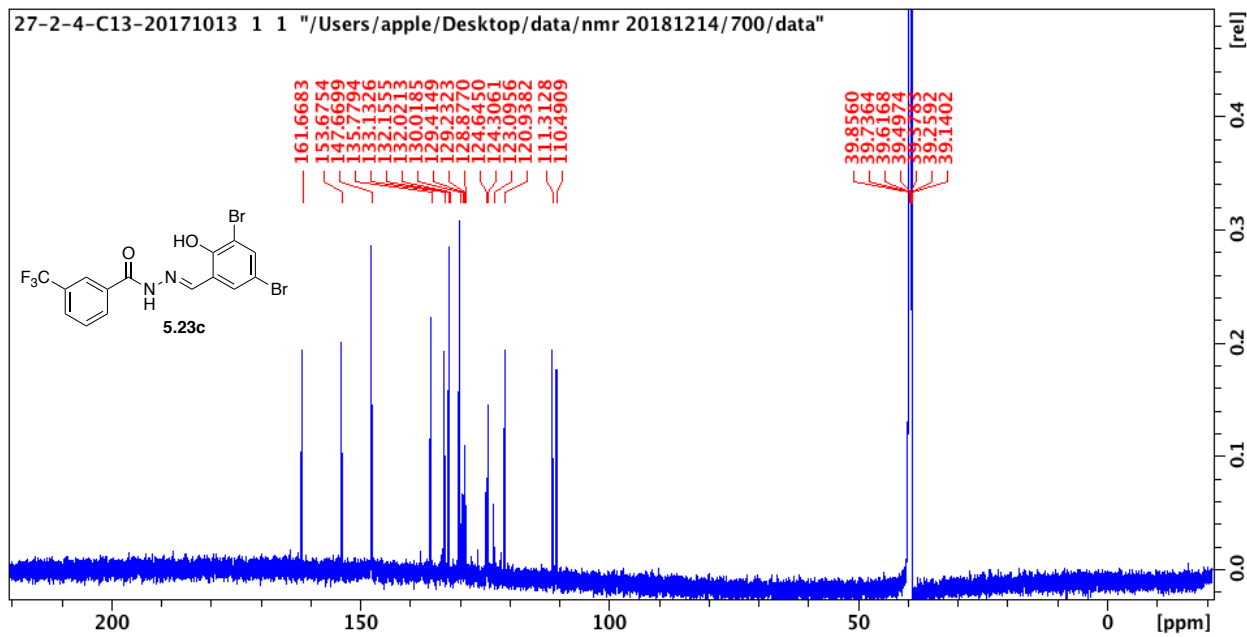

<sup>13</sup>C NMR of compound 5.23c

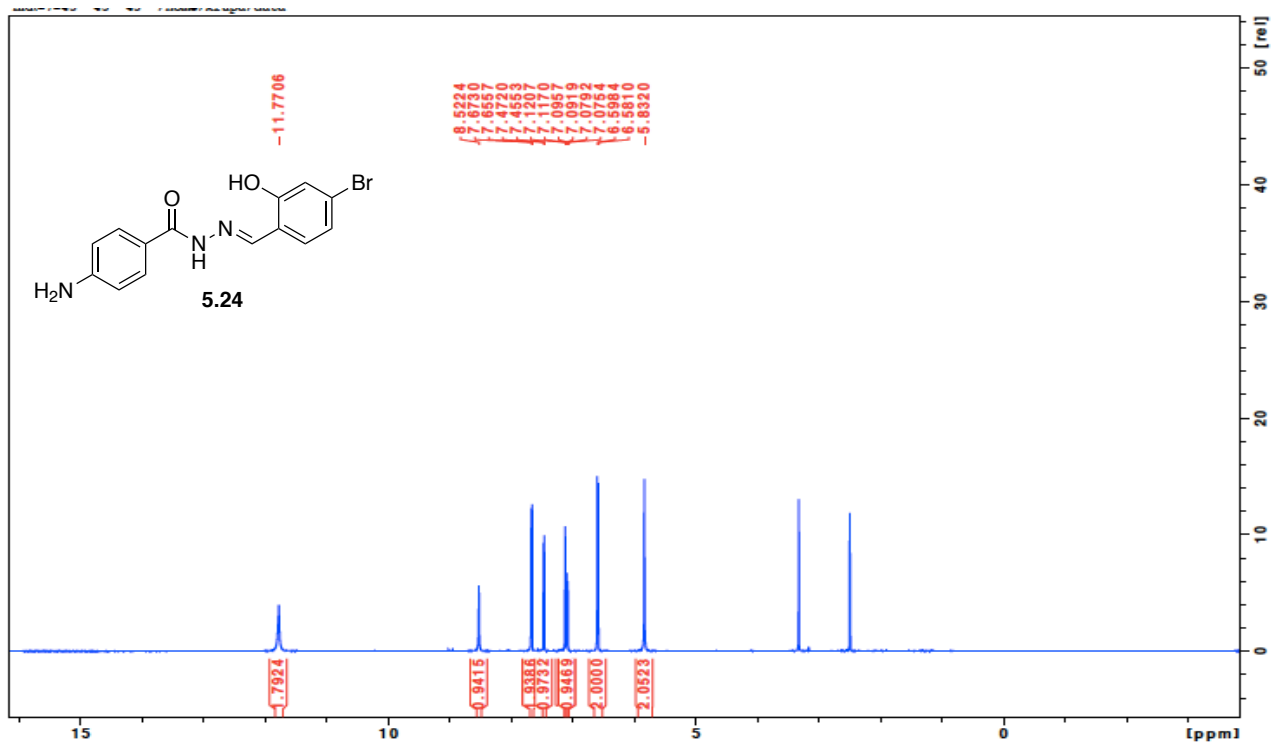

<sup>1</sup>H NMR of compound 5.24

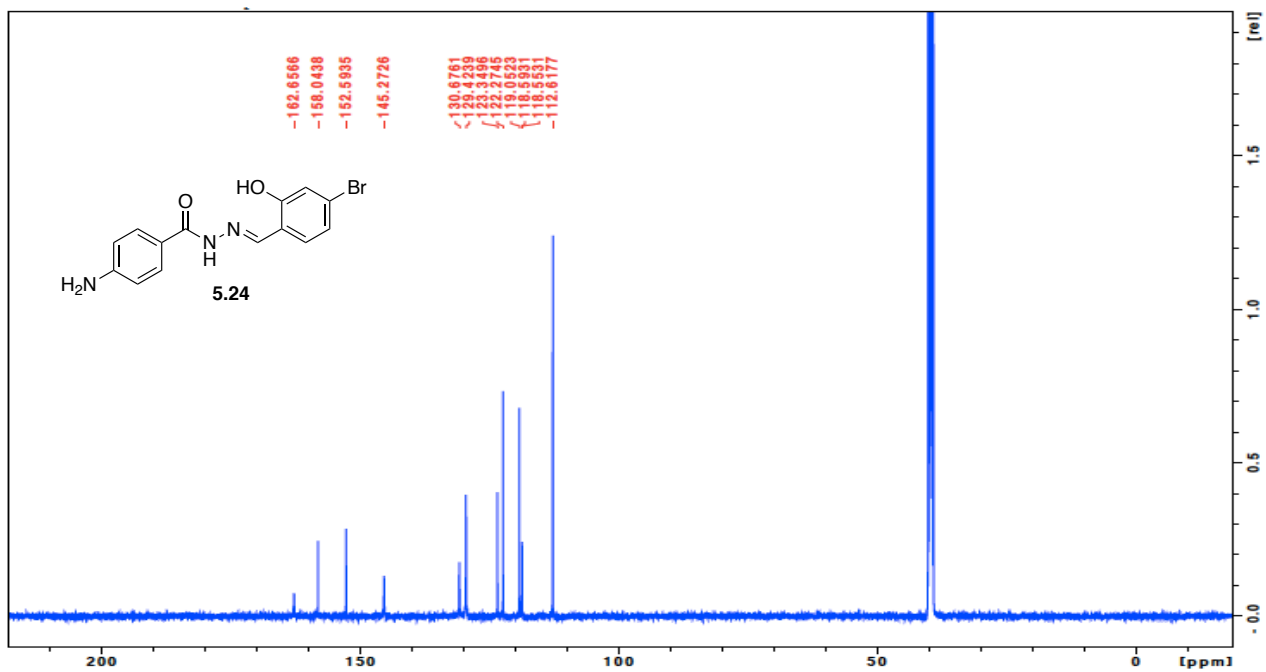

<sup>13</sup>C NMR of compound 5.24



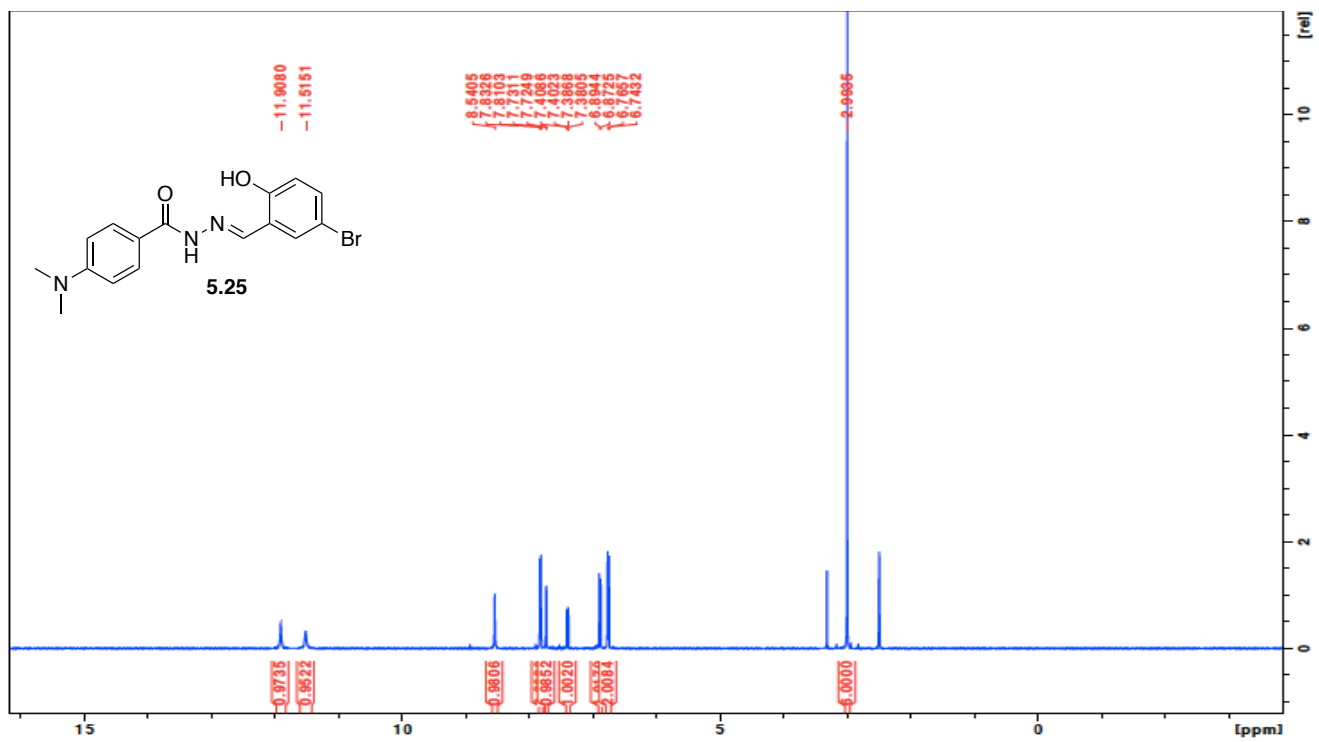

<sup>1</sup>H NMR of compound 5.25

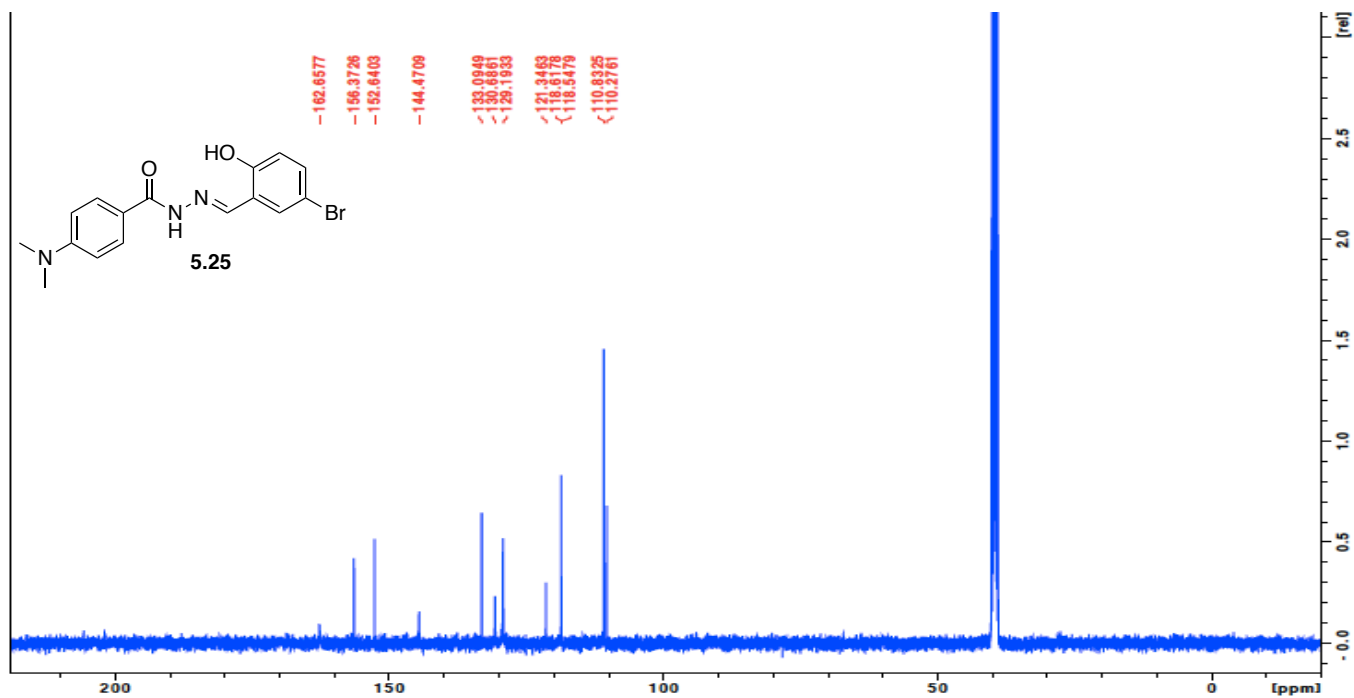

<sup>13</sup>C NMR of compound 5.25

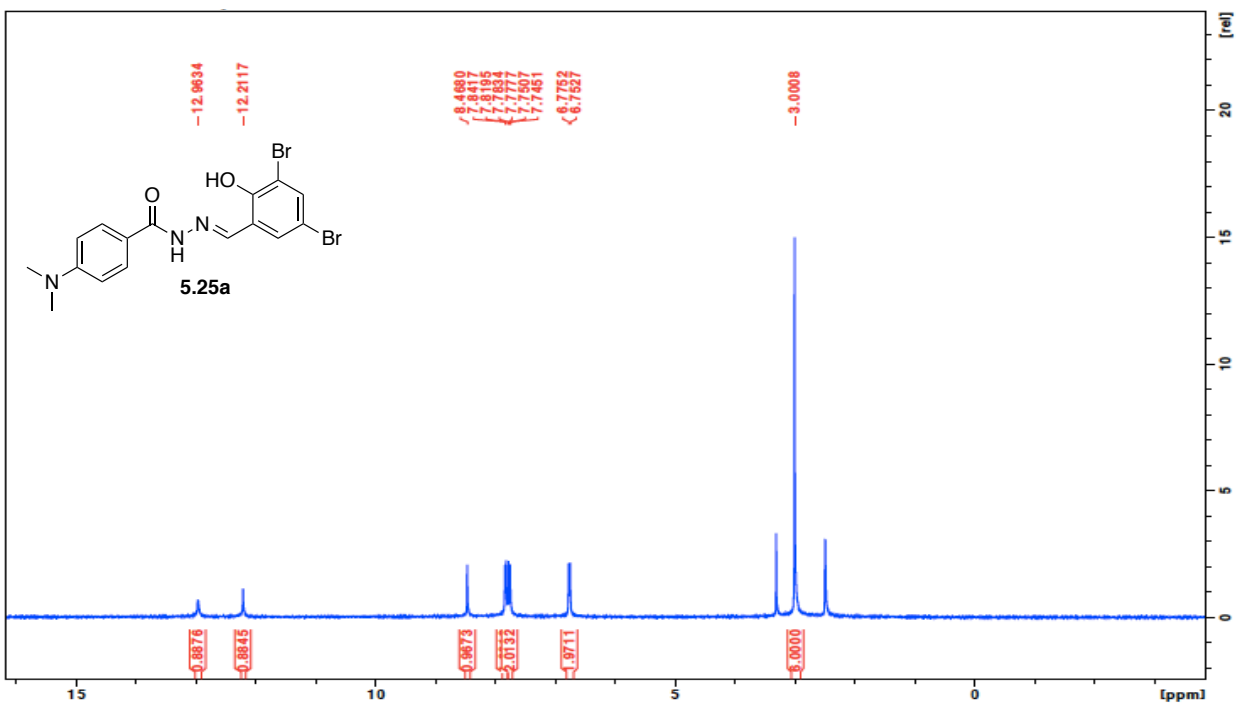

**<sup>1</sup>H NMR of compound 5.25a**

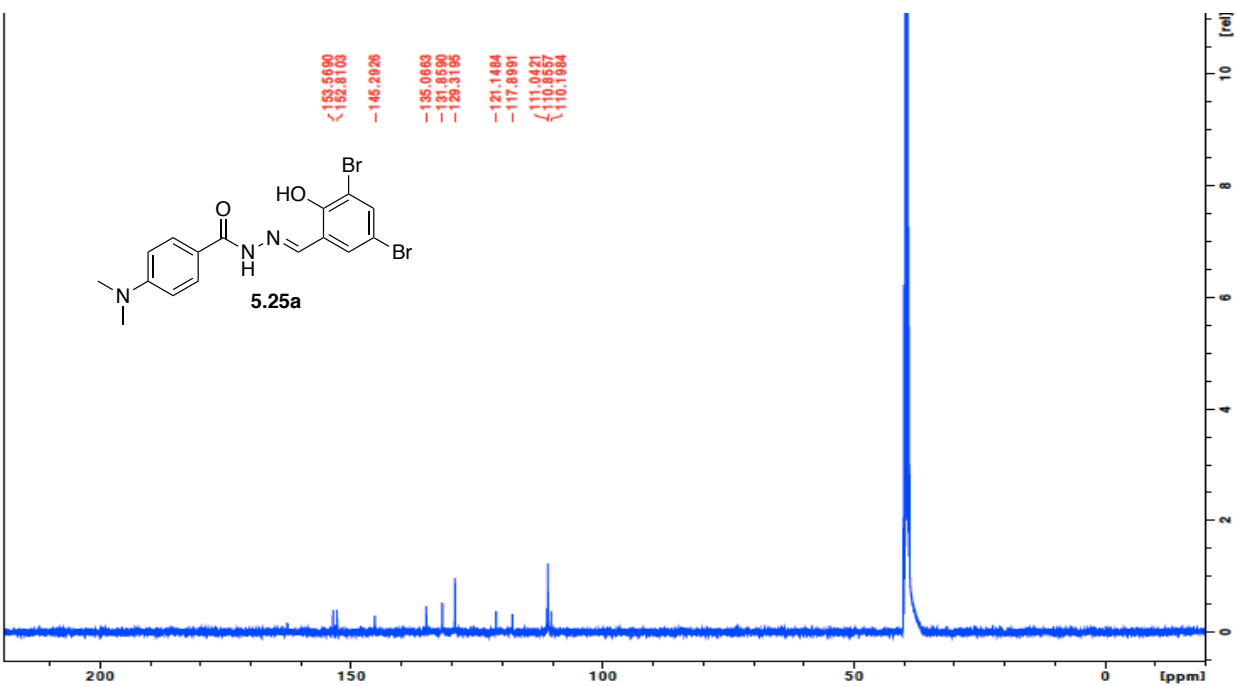

**<sup>13</sup>C NMR of compound 5.25a**

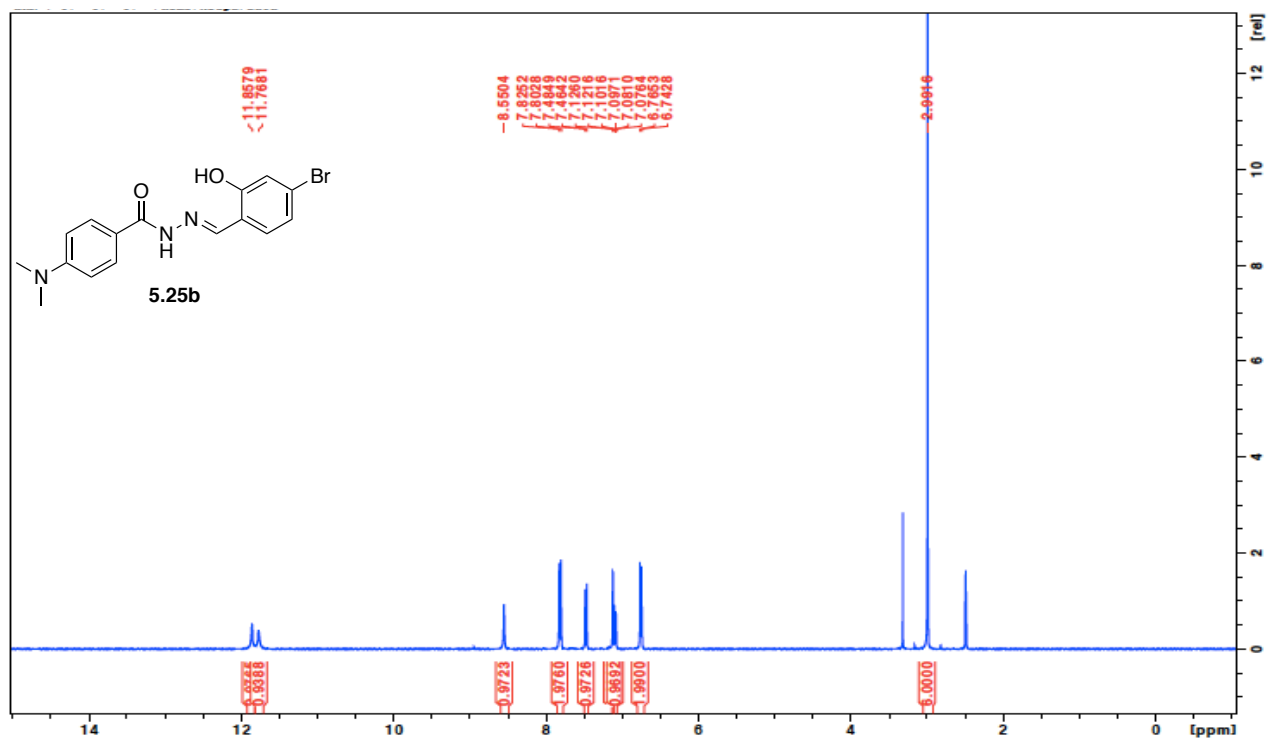

**<sup>1</sup>H NMR of compound 5.25b**

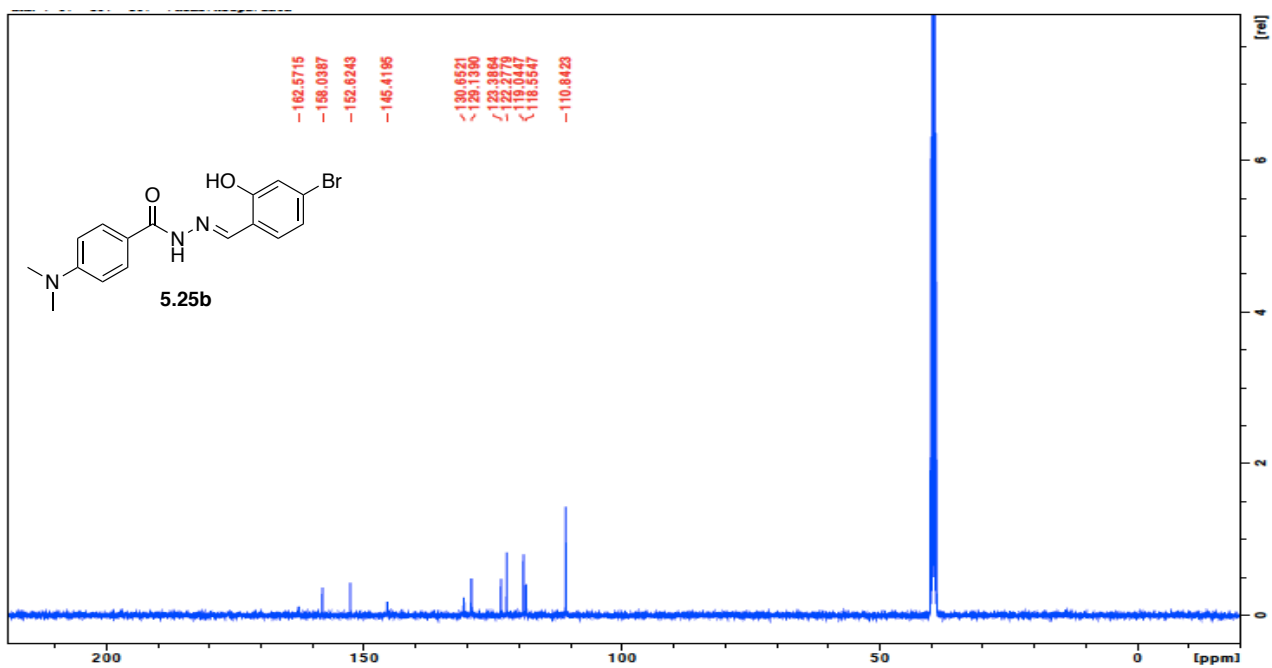

**<sup>13</sup>C NMR of compound 5.25b**

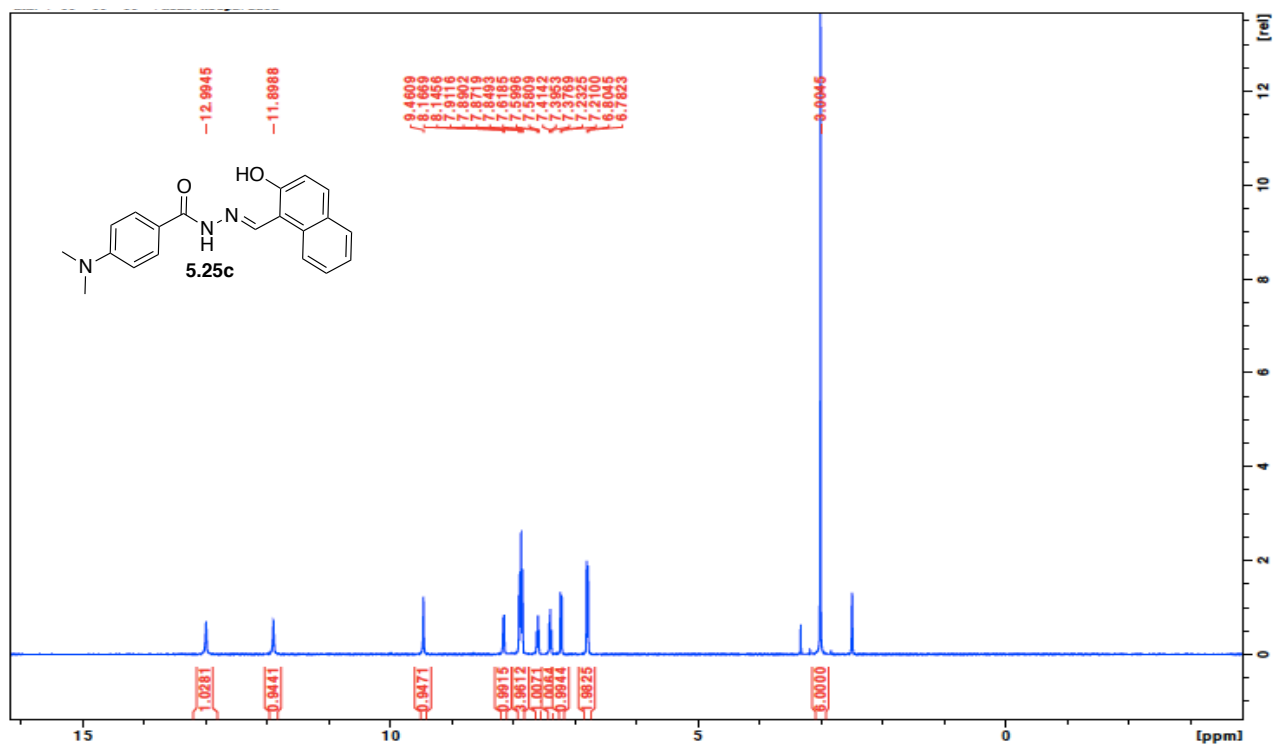

<sup>1</sup>H NMR of compound 5.25c

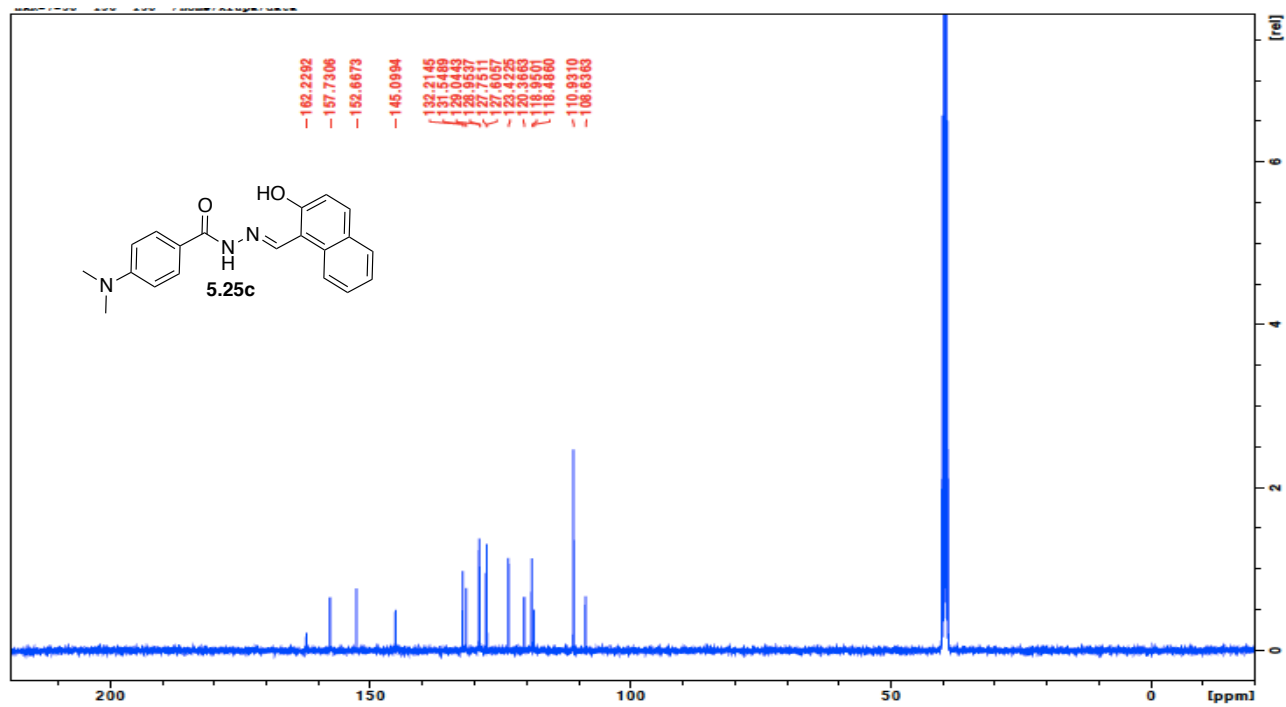

<sup>13</sup>C NMR of compound 5.25c

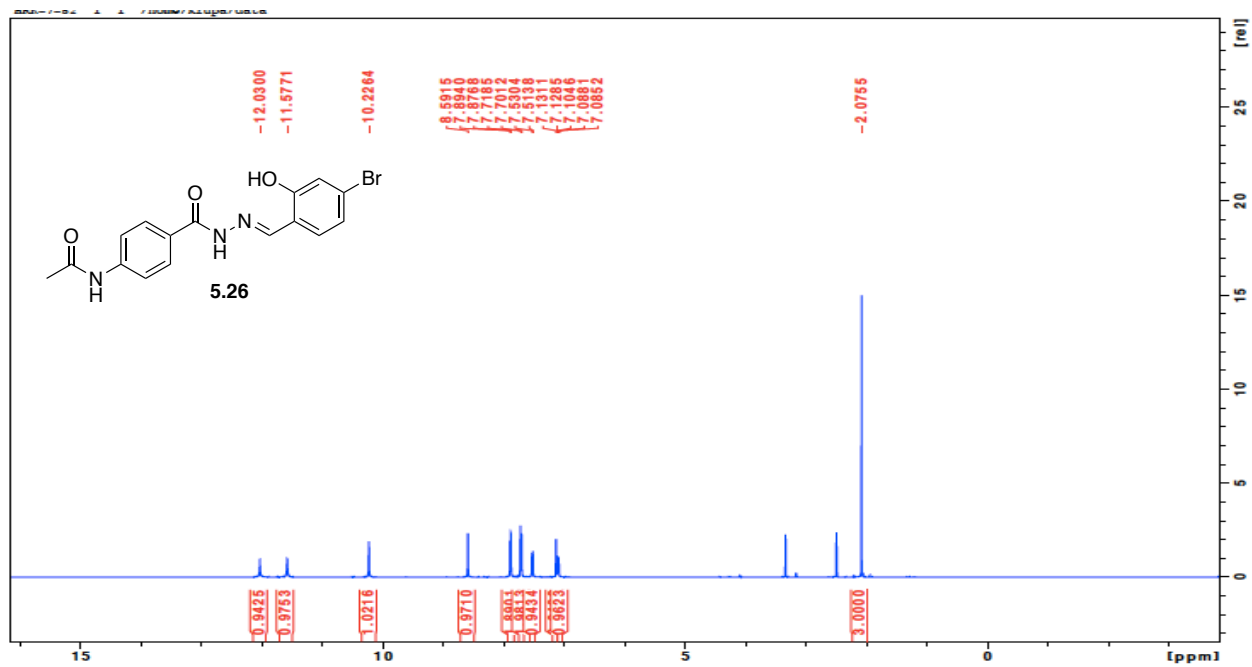

**<sup>1</sup>H NMR of compound 5.26**

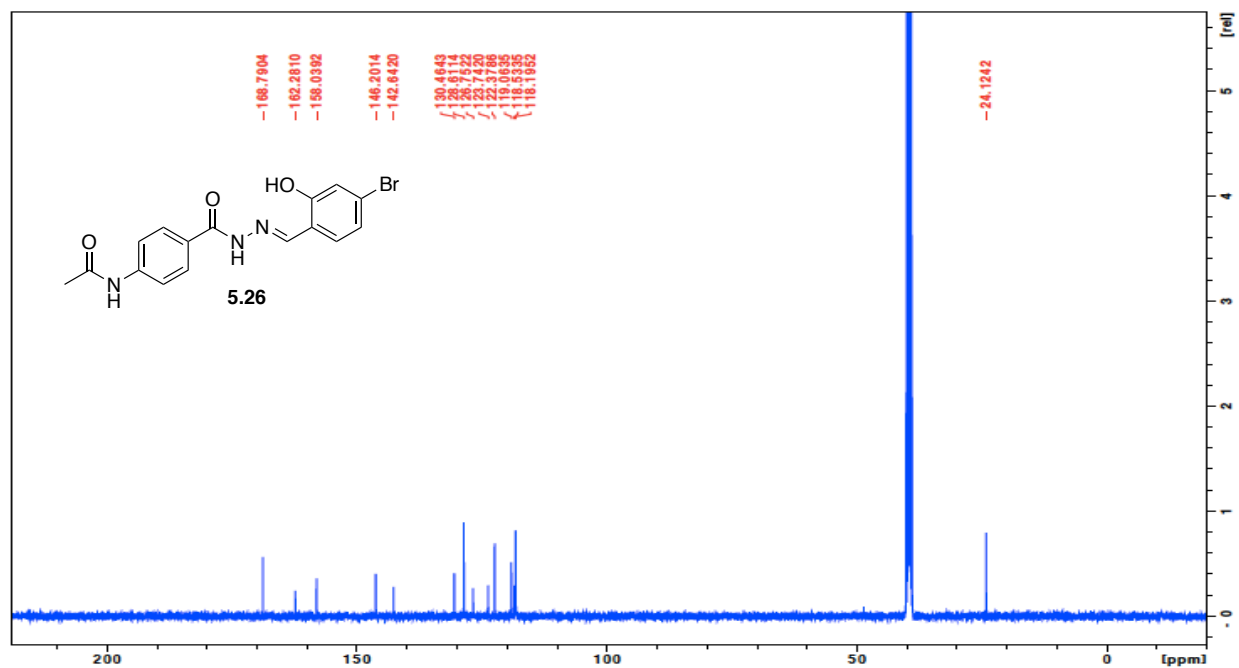

**<sup>13</sup>C NMR of compound 5.26**

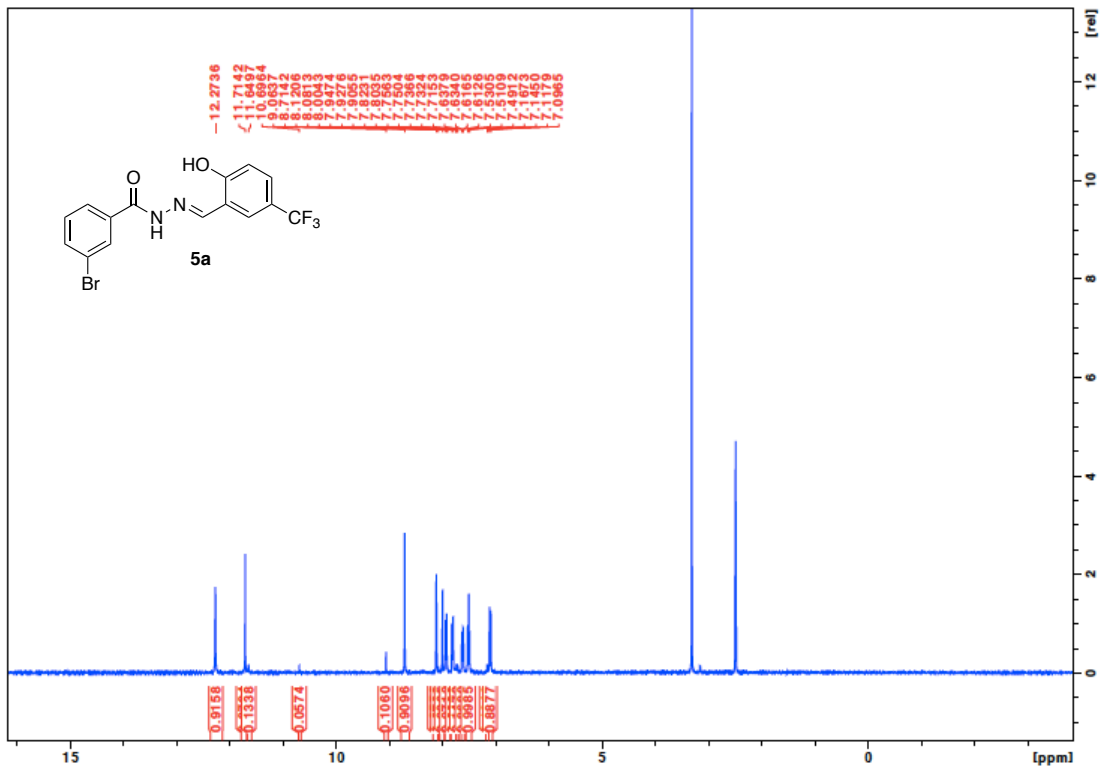

**<sup>1</sup>H NMR of compound 5a**

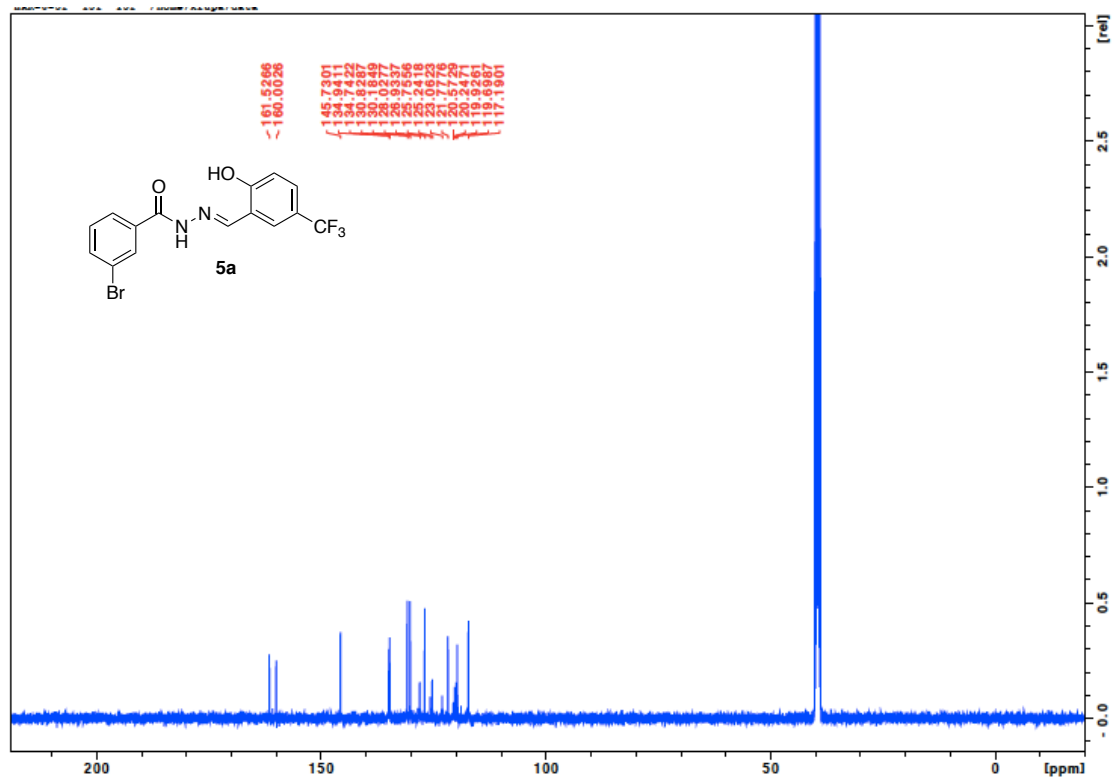

**<sup>13</sup>C NMR of compound 5a**

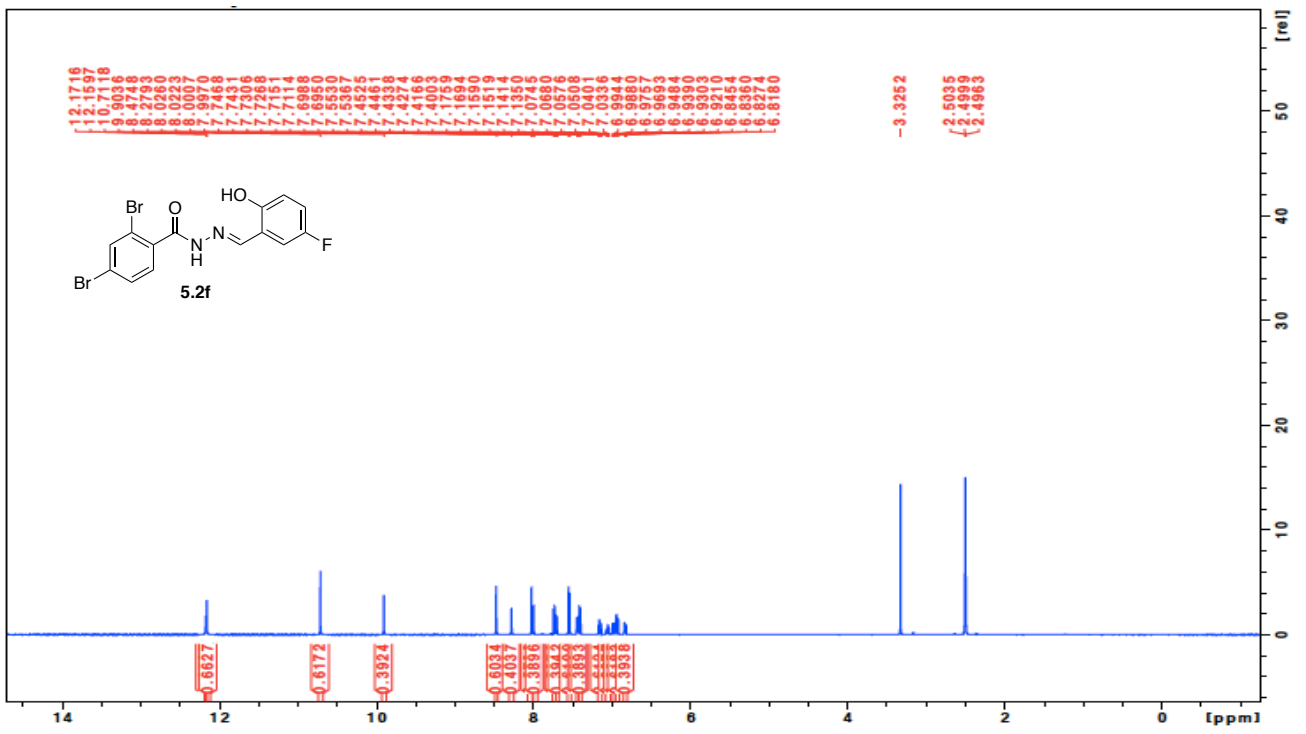

<sup>1</sup>H NMR of compound 5.2f

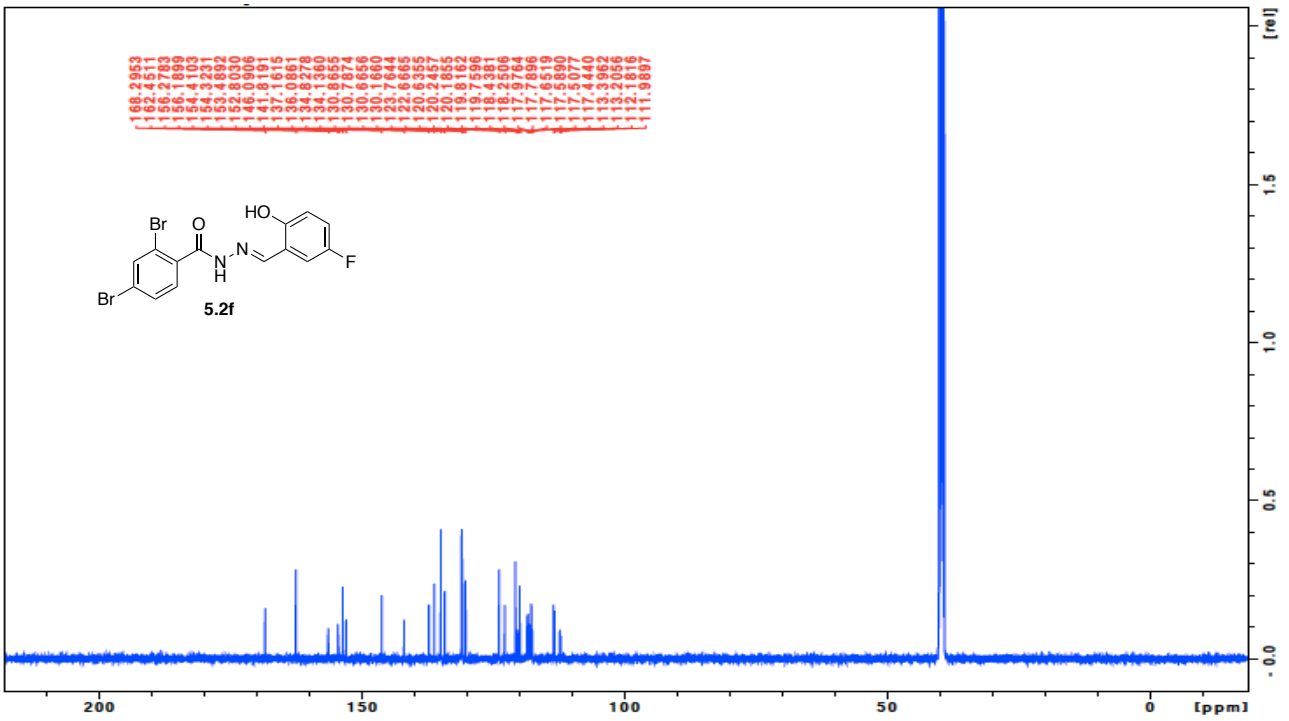

<sup>13</sup>C NMR of compound 5.2f

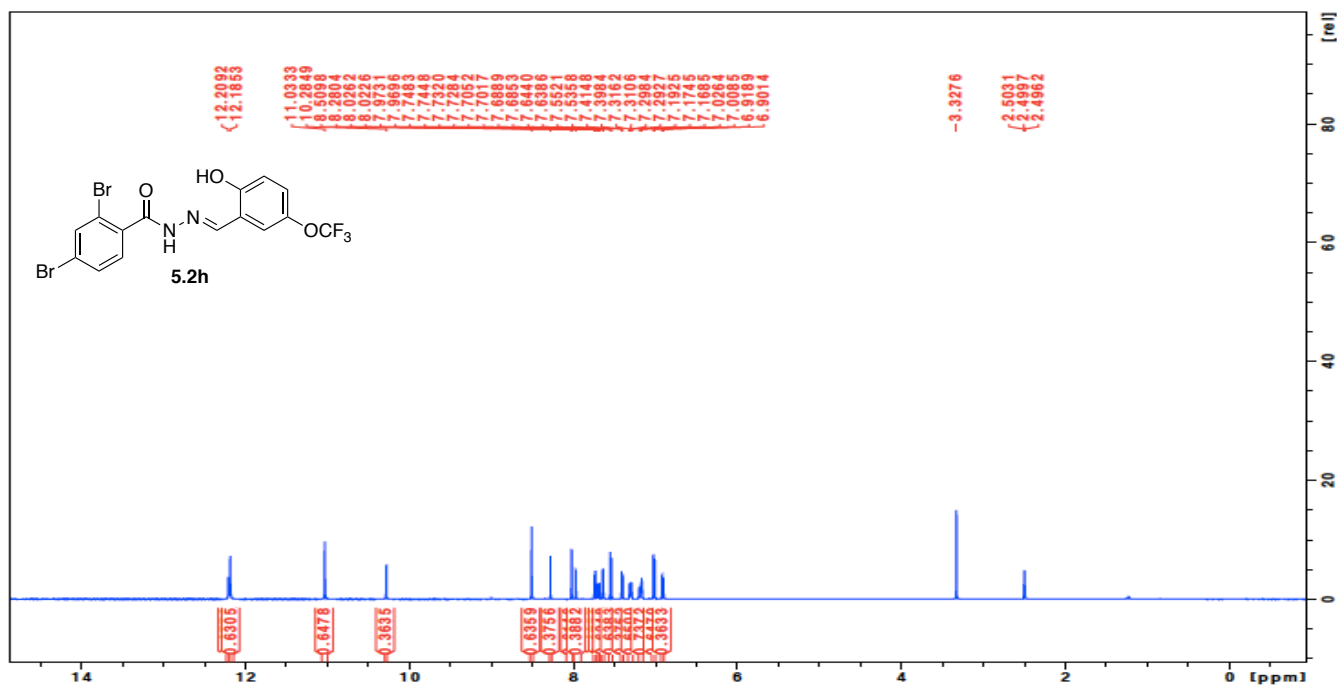

**<sup>1</sup>H NMR of compound 5.2h**

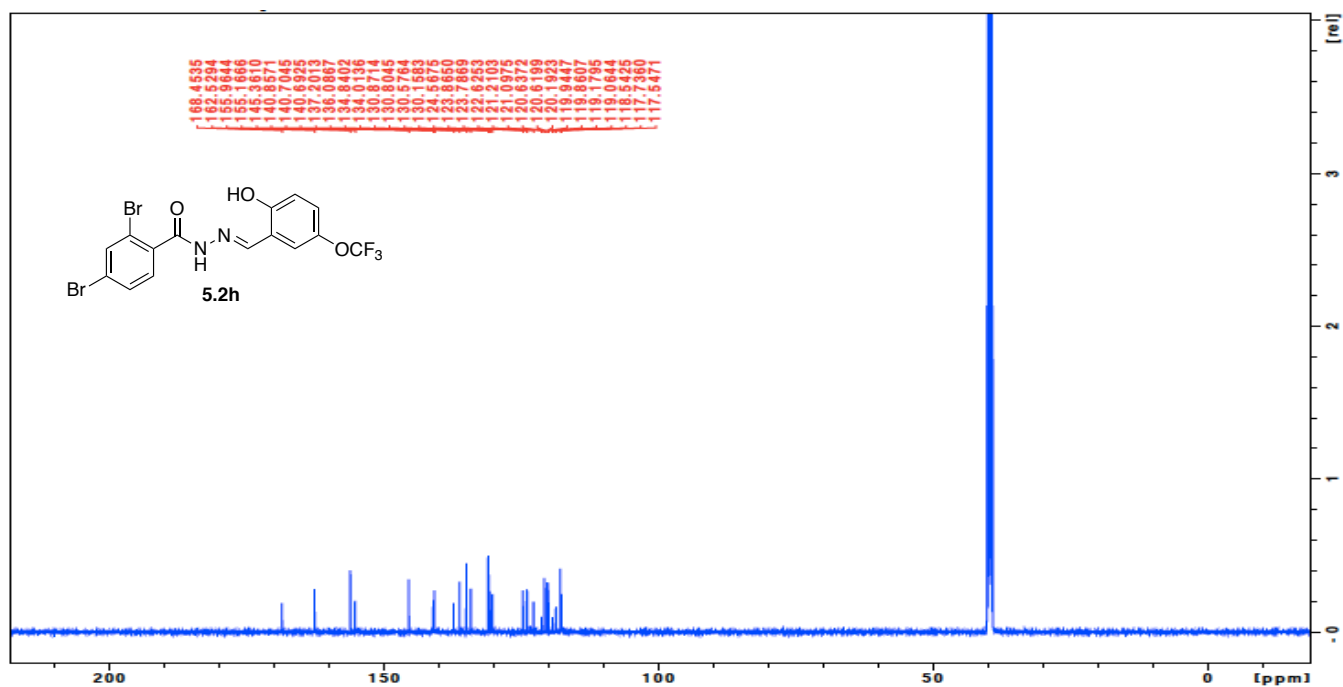

**<sup>13</sup>C NMR of compound 5.2h**



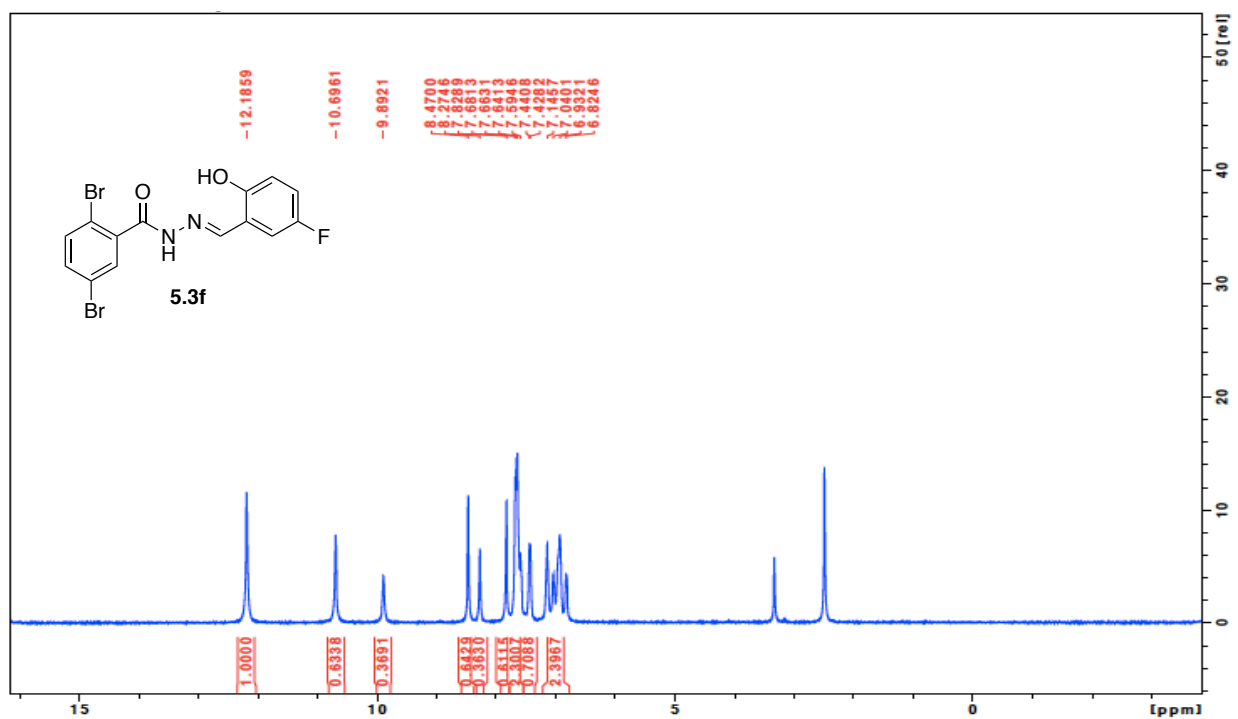

<sup>1</sup>H NMR of compound 5.3f

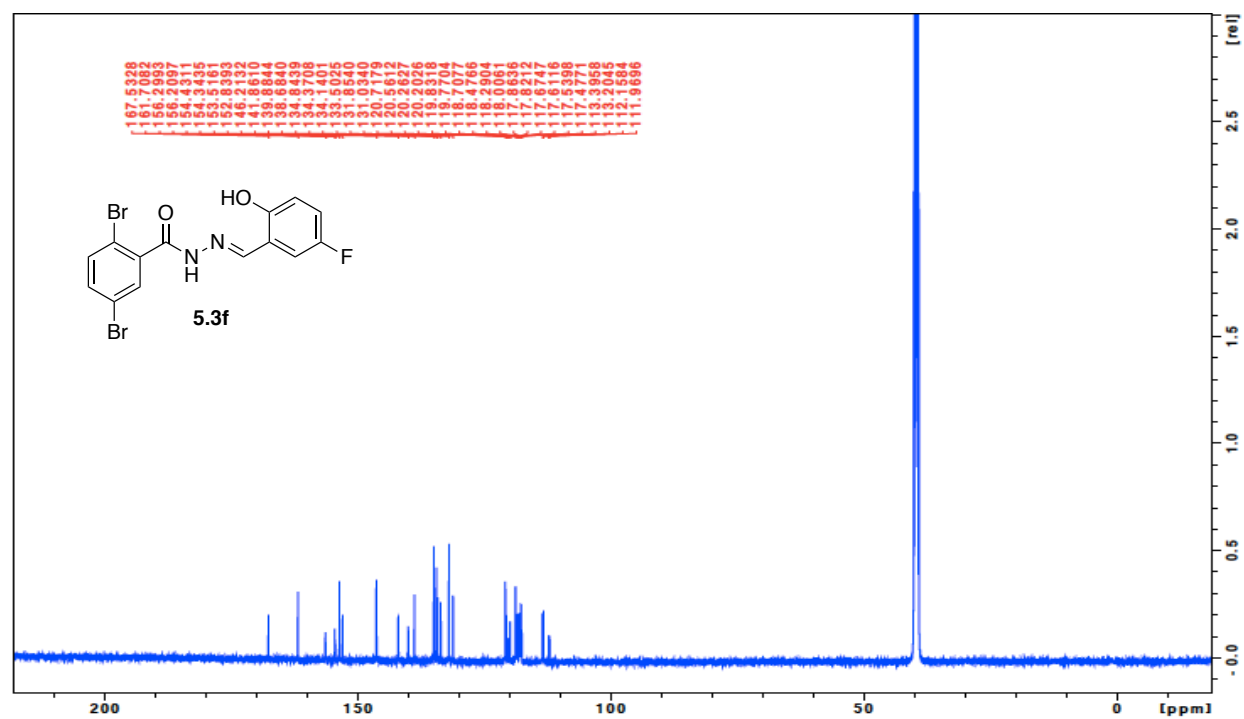

<sup>13</sup>C NMR of compound 5.3f

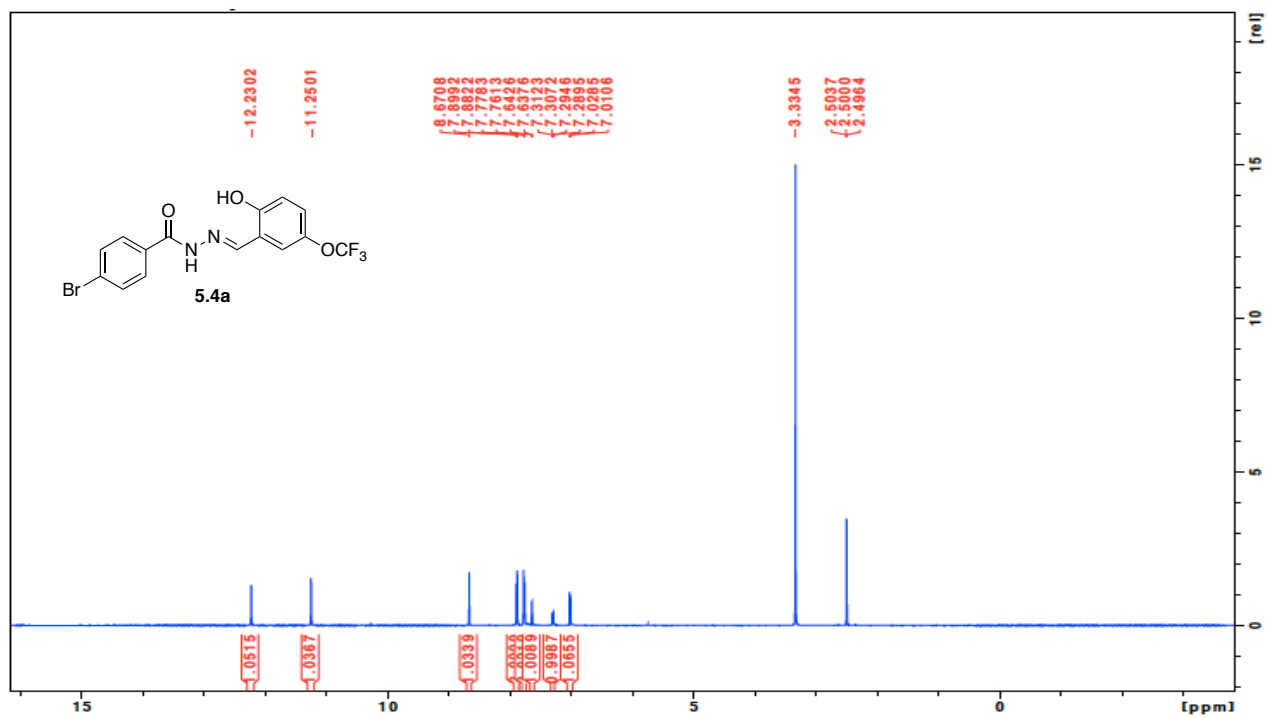

<sup>1</sup>H NMR of compound 5.4a

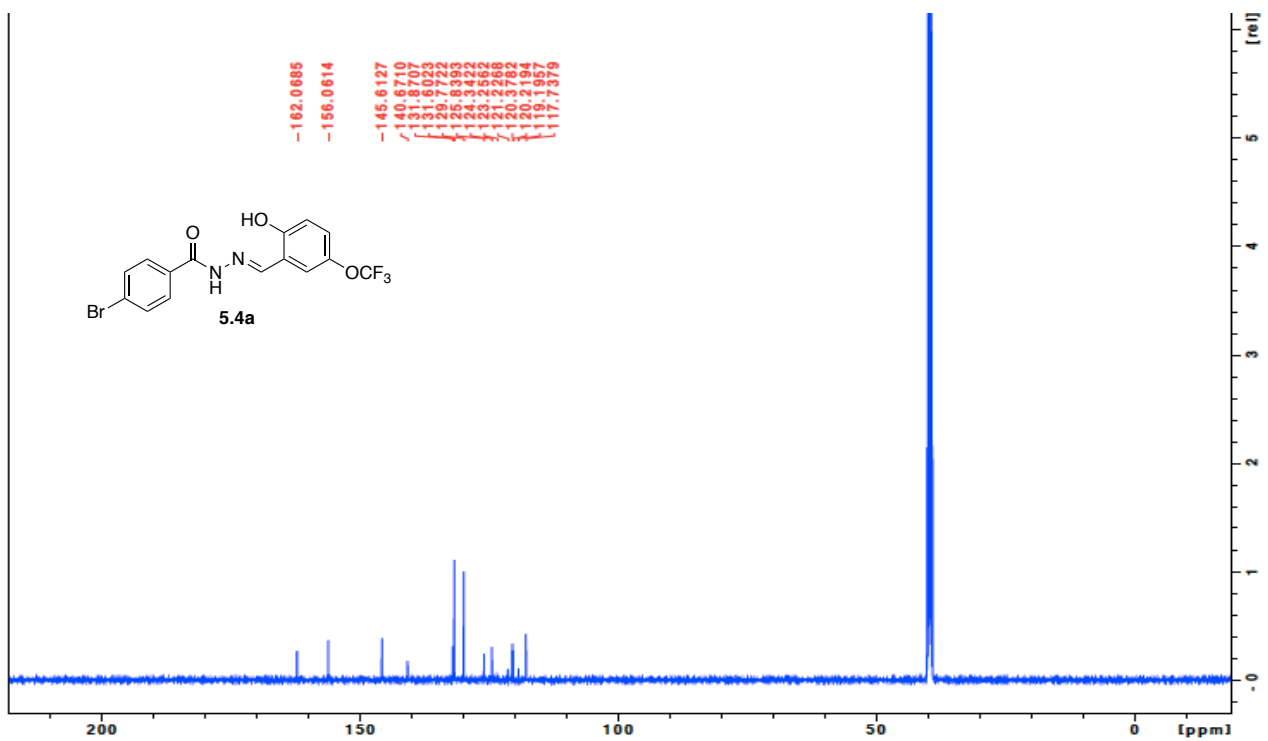

<sup>13</sup>C NMR of compound 5.4a

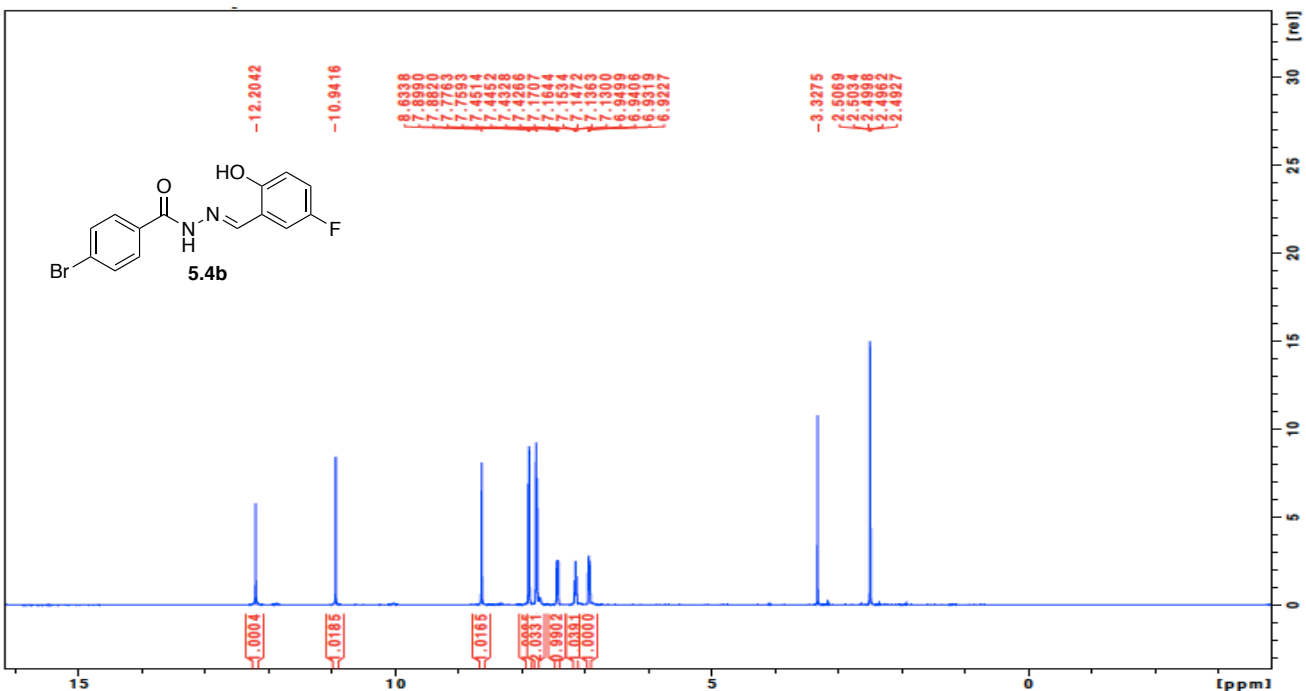

<sup>1</sup>H NMR of compound 5.4b

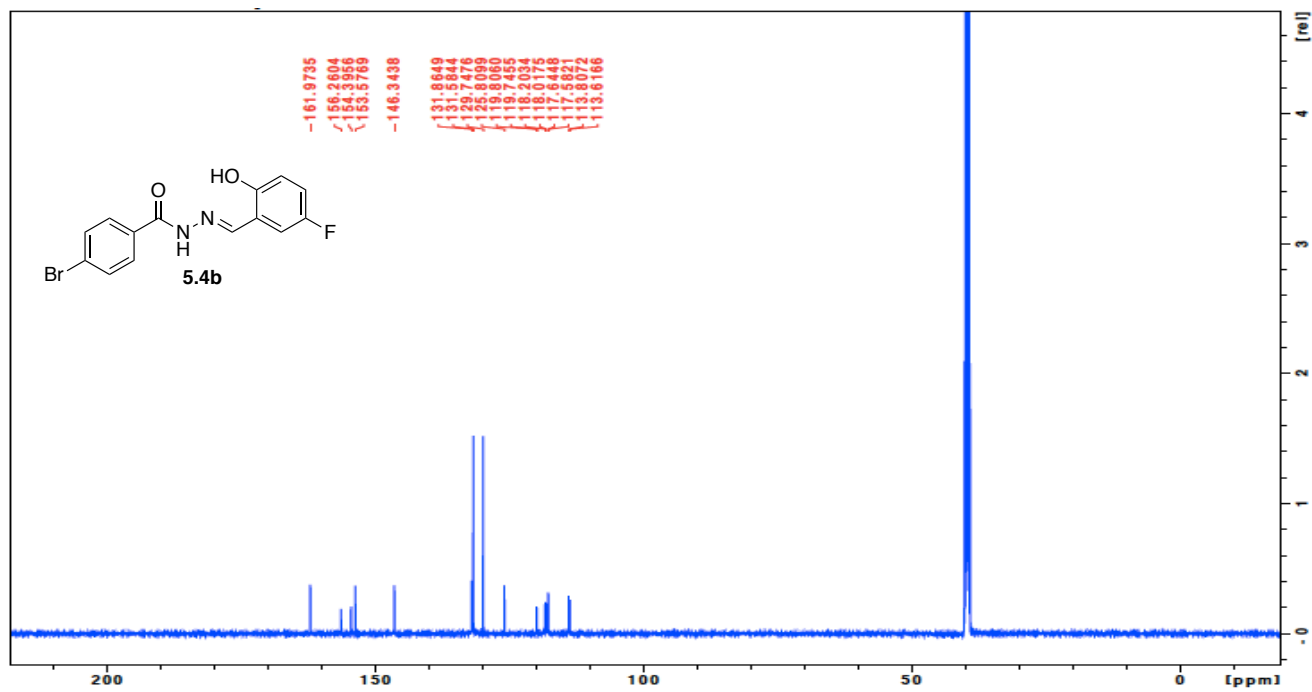

<sup>13</sup>C NMR of compound 5.4b

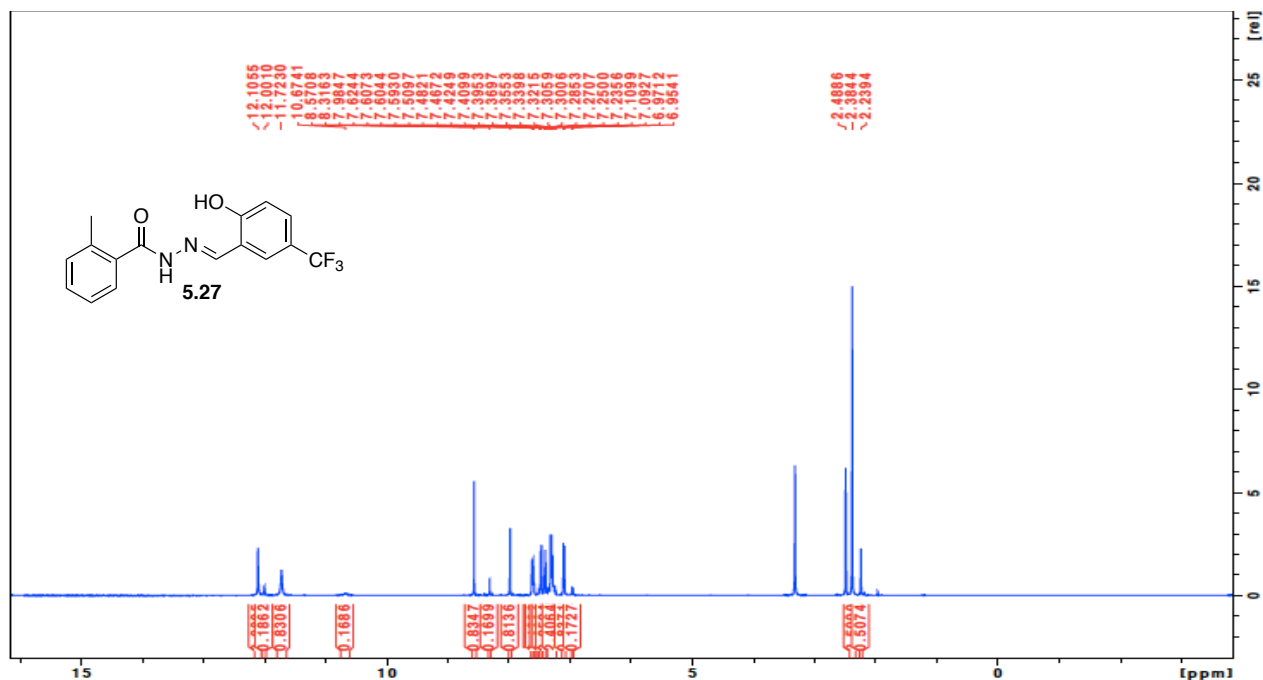

**<sup>1</sup>H NMR of compound 5.27**

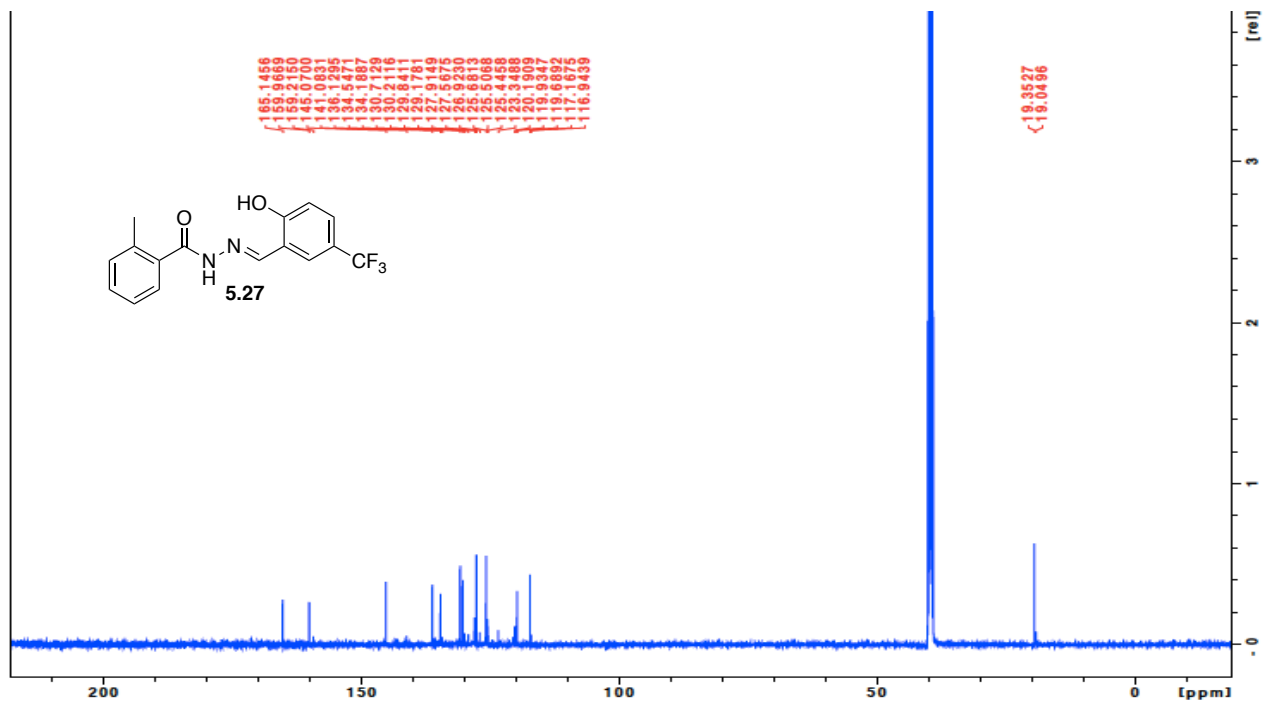

**<sup>13</sup>C NMR of compound 5.27**

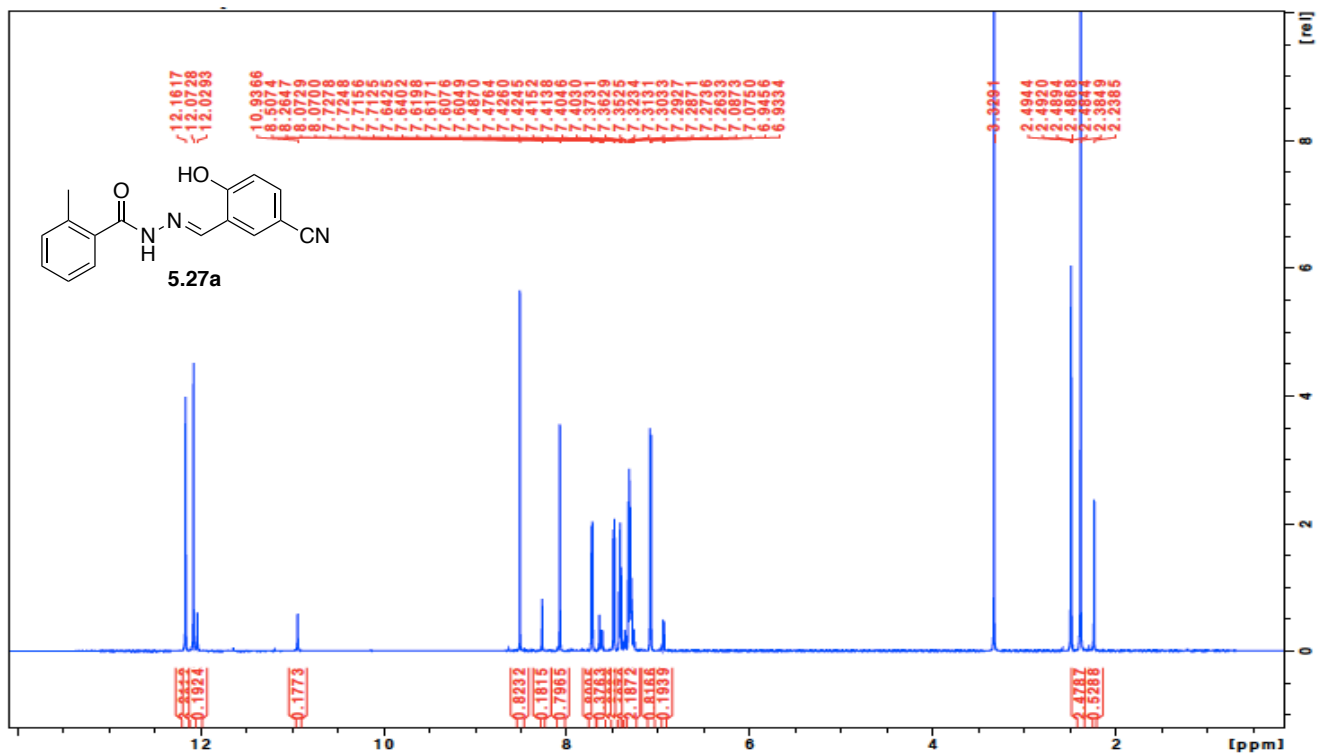

<sup>1</sup>H NMR of compound 5.27a

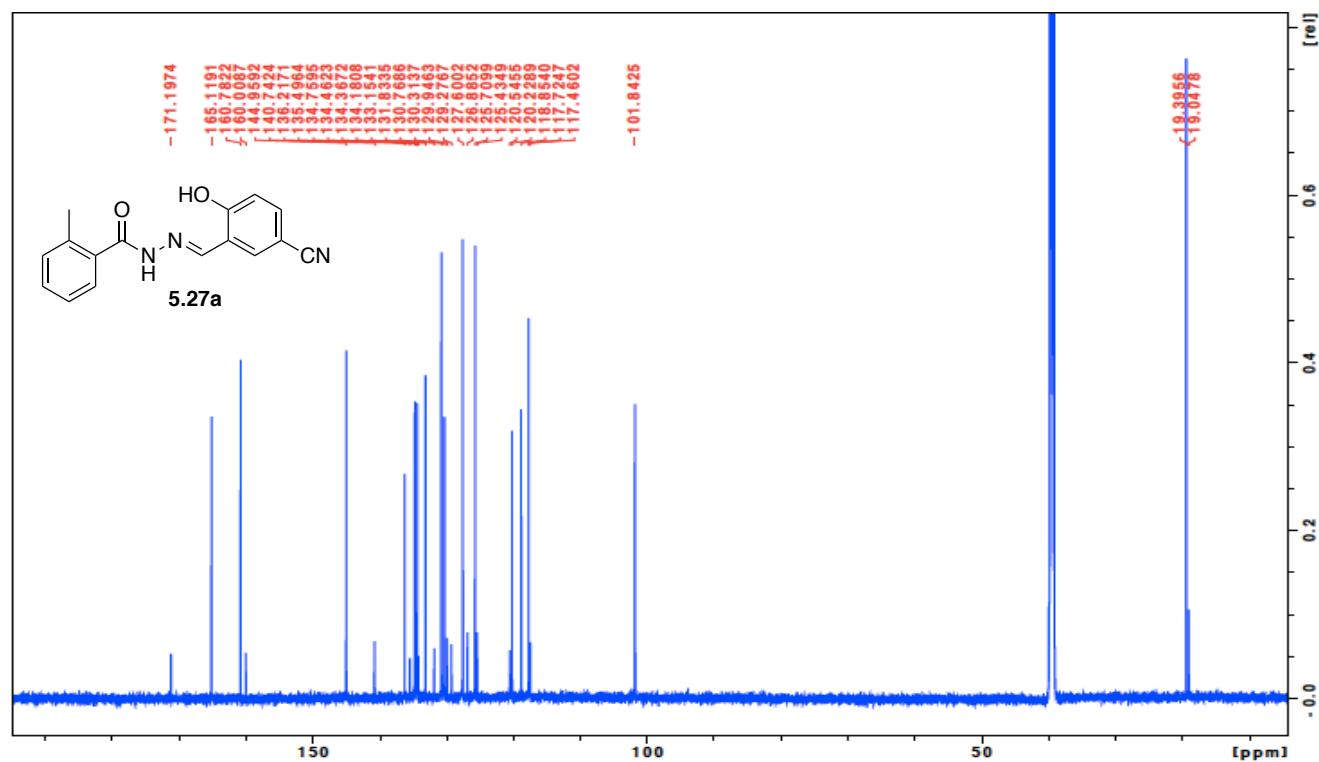

<sup>13</sup>C NMR of compound 5.27a

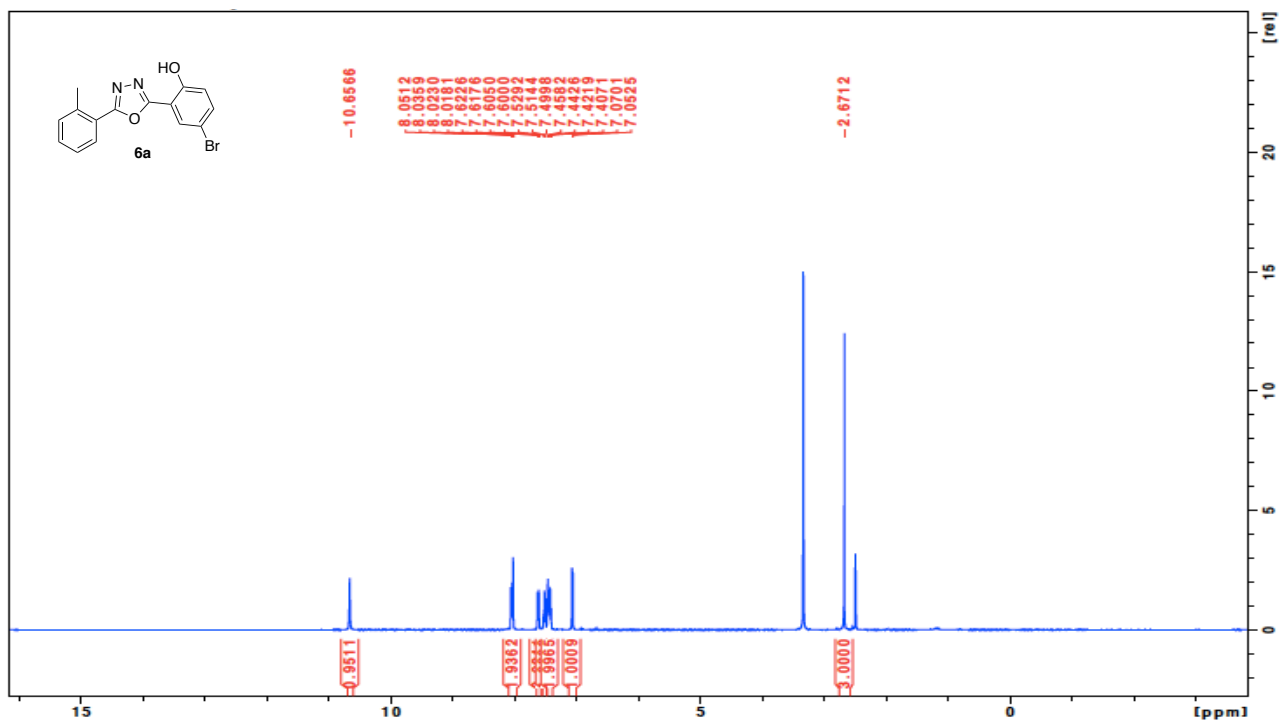

<sup>1</sup>H NMR of compound 6a

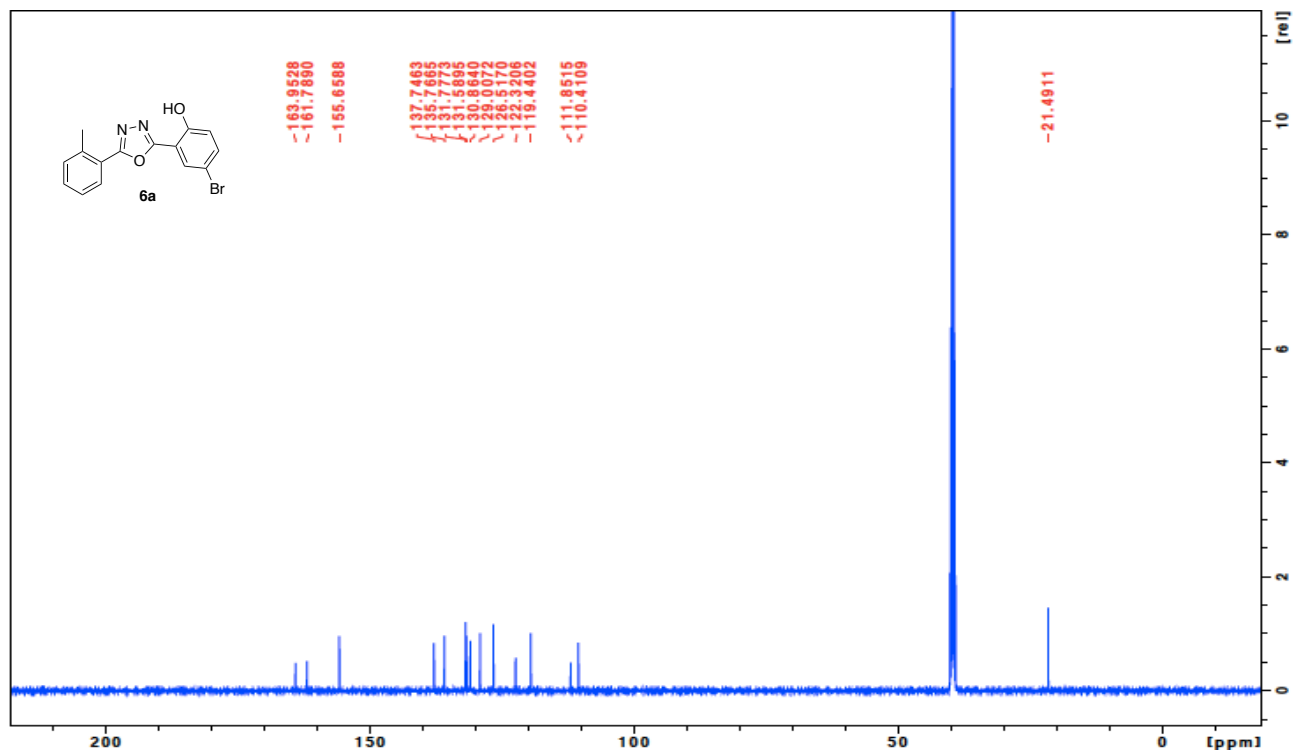

<sup>13</sup>C NMR of compound 6a

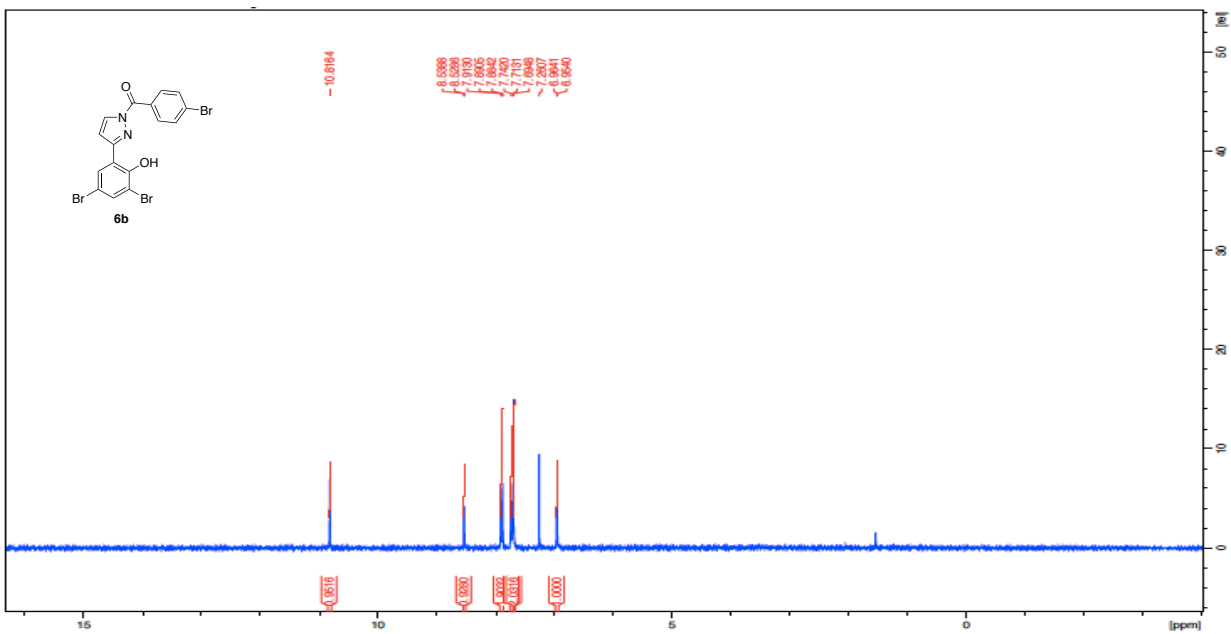

<sup>1</sup>H NMR of compound 6b

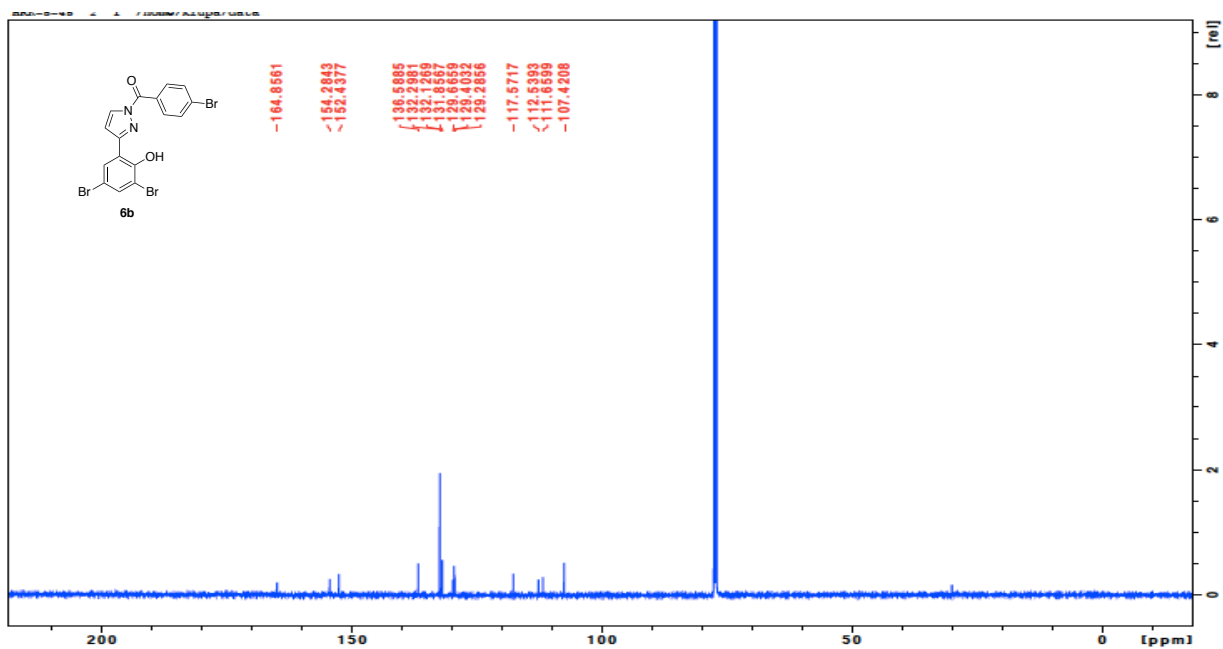

<sup>13</sup>C NMR of compound 6b

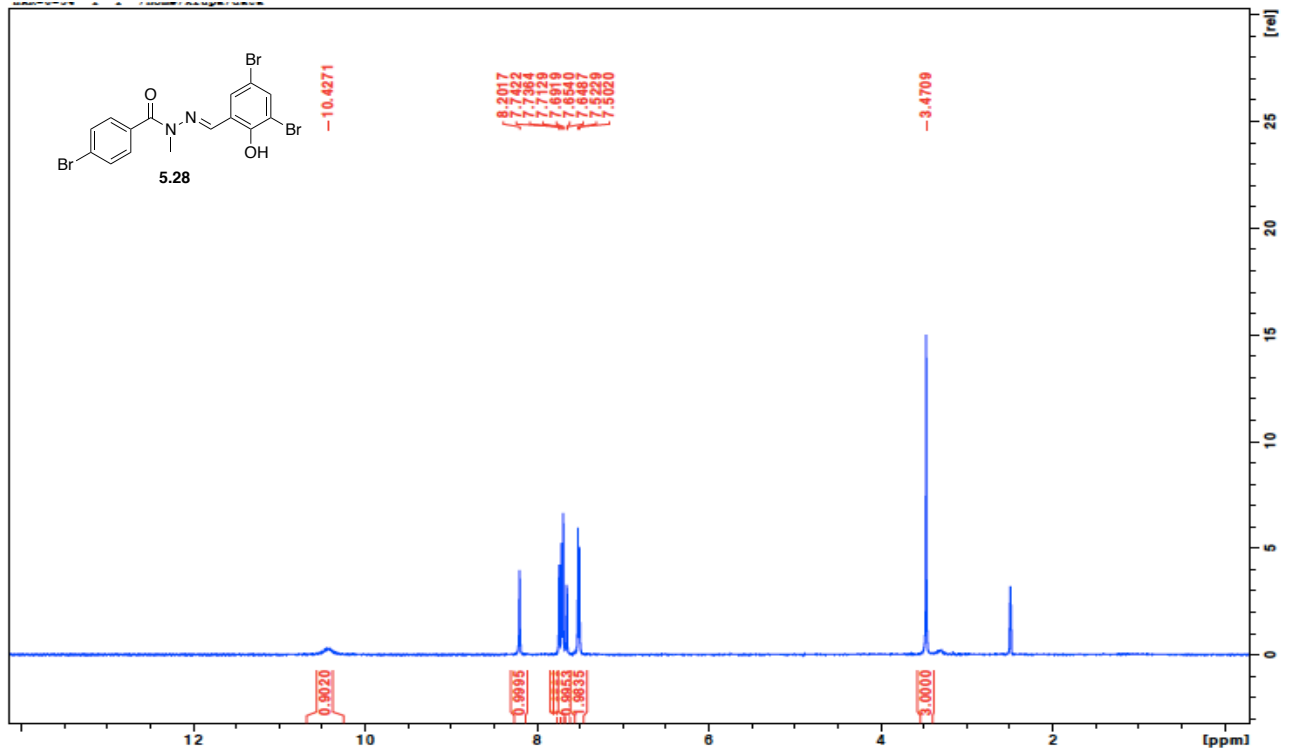

**<sup>1</sup>H NMR of compound 5.28**

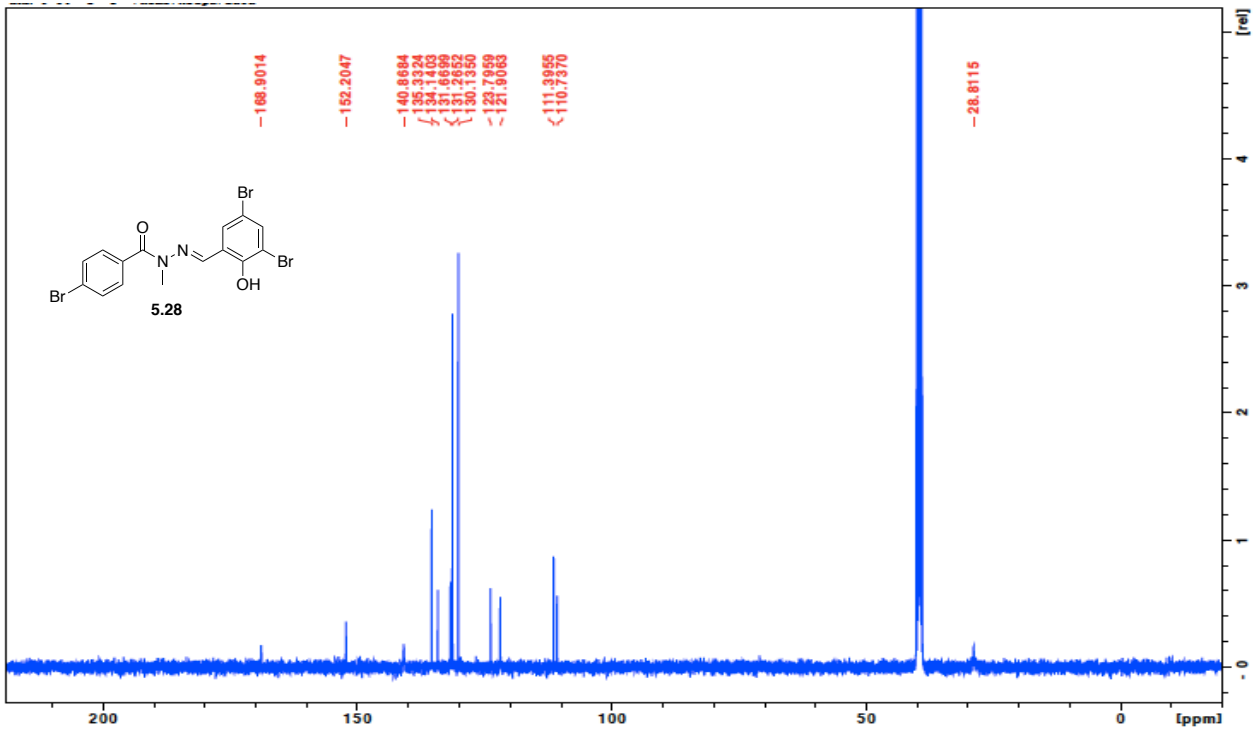

**<sup>13</sup>C NMR of compound 5.28**



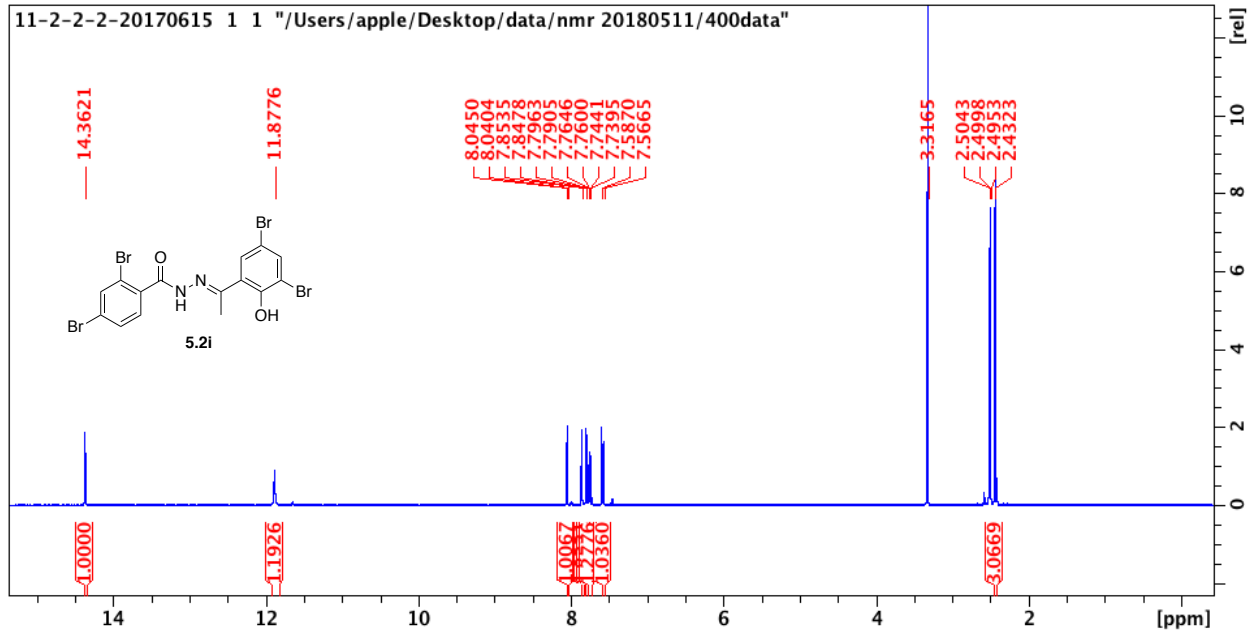

<sup>1</sup>H NMR of compound 5.2i

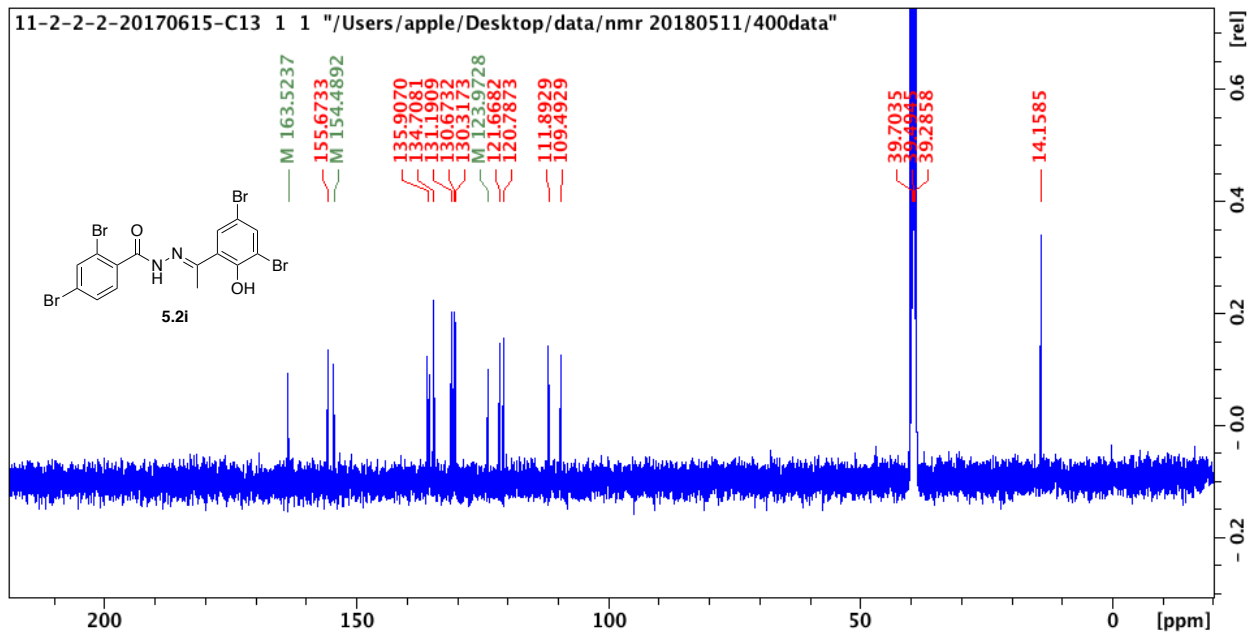

<sup>13</sup>C NMR of compound 5.2i

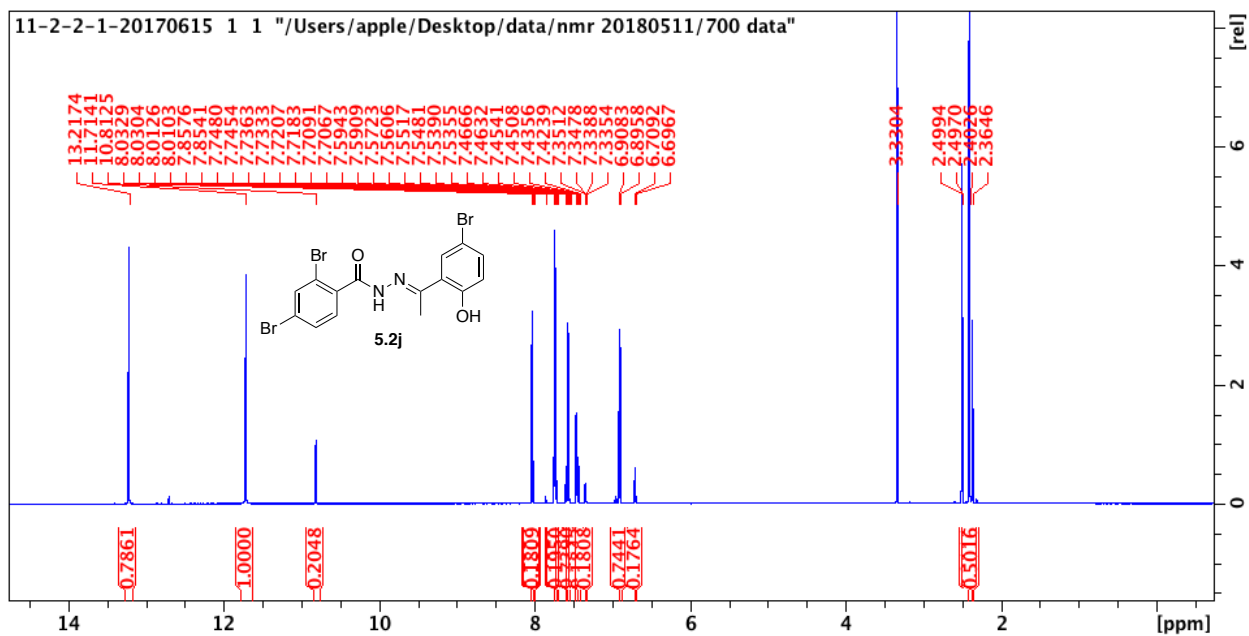

<sup>1</sup>H NMR of compound 5.2j

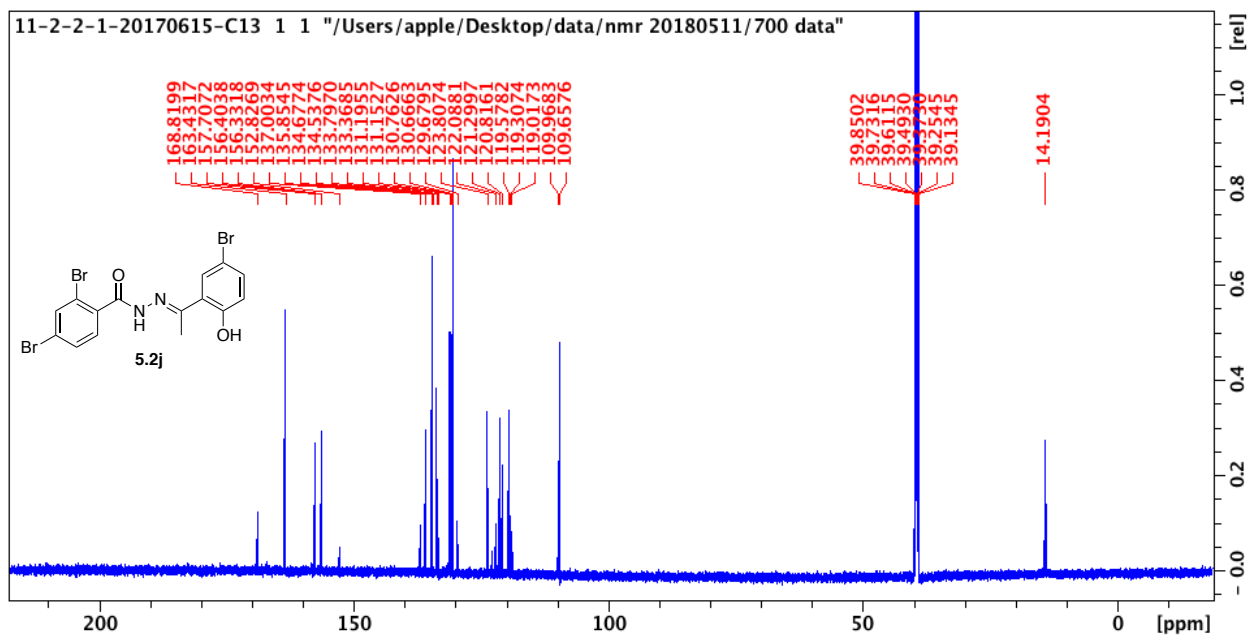

<sup>13</sup>C NMR of compound 5.2j

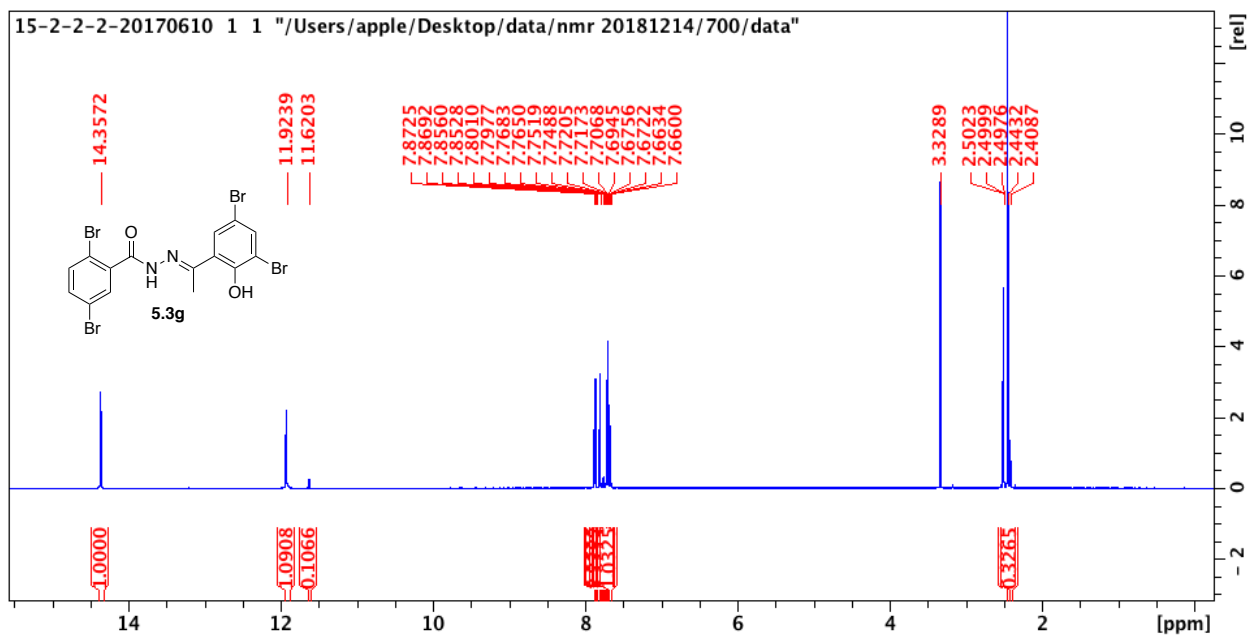

<sup>1</sup>H NMR of compound 5.3g

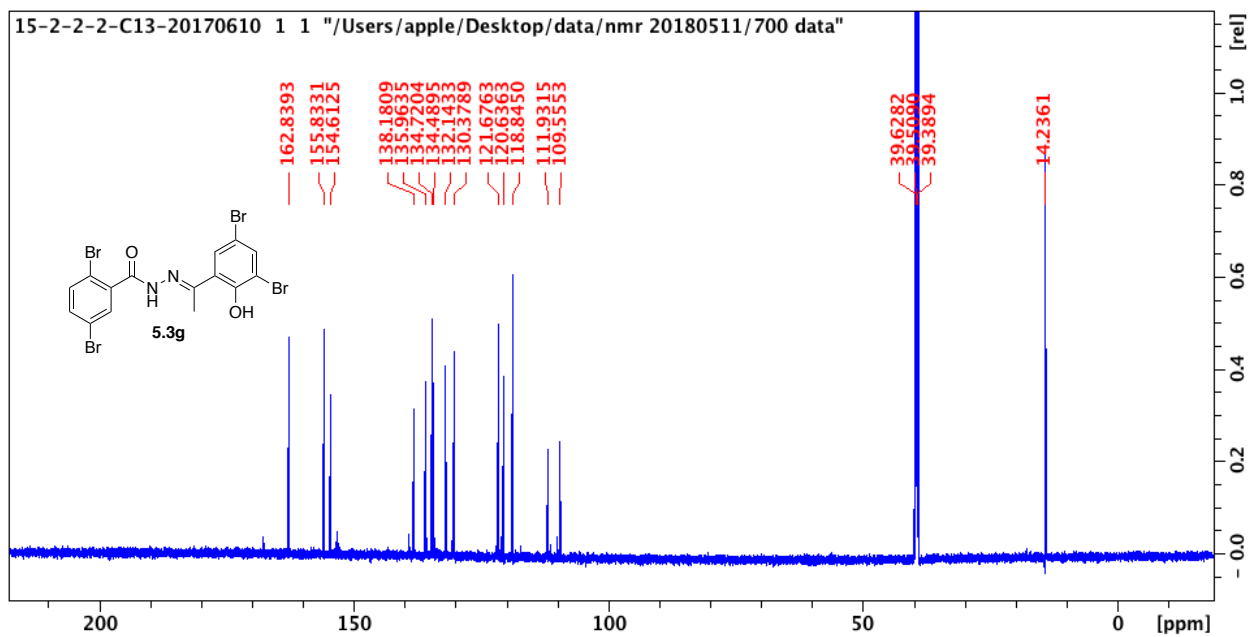

<sup>13</sup>C NMR of compound 5.3g

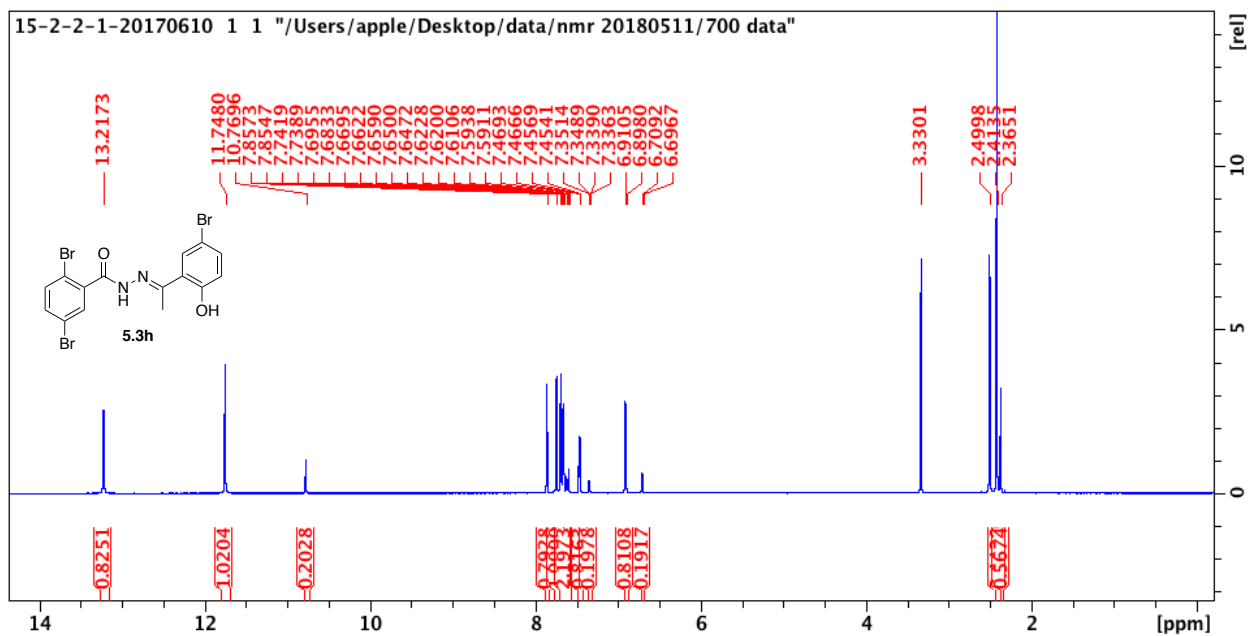

**<sup>1</sup>H NMR of compound 5.3h**

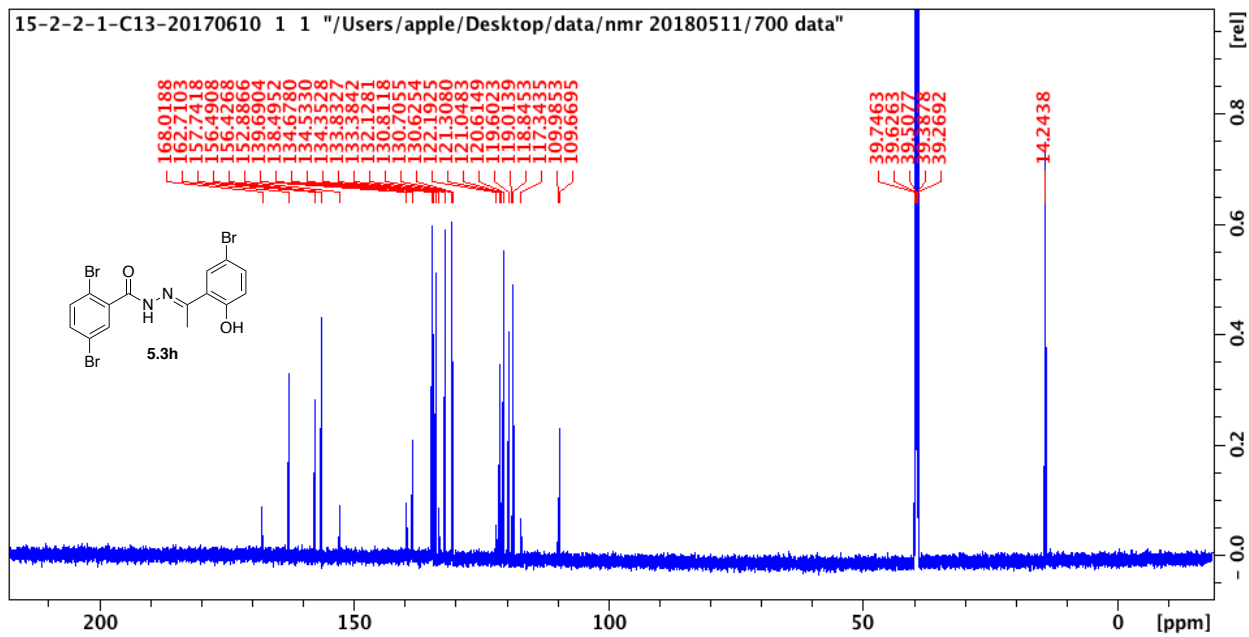

**<sup>13</sup>C NMR of compound 5.3h**

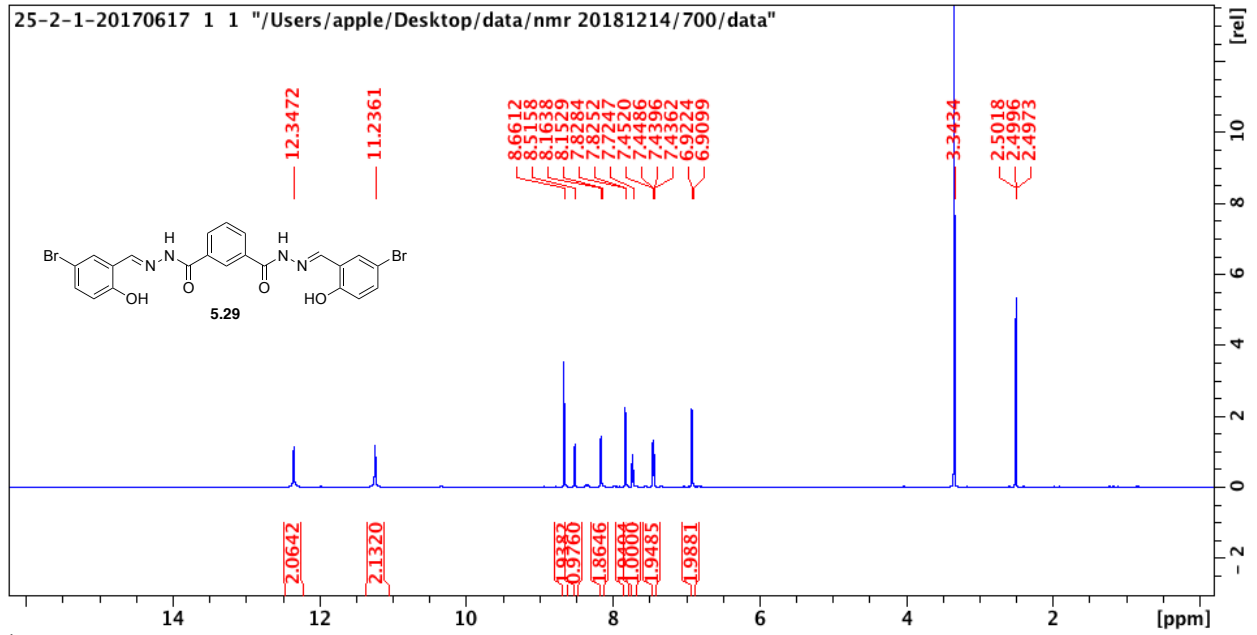

<sup>1</sup>H NMR of compound 5.29

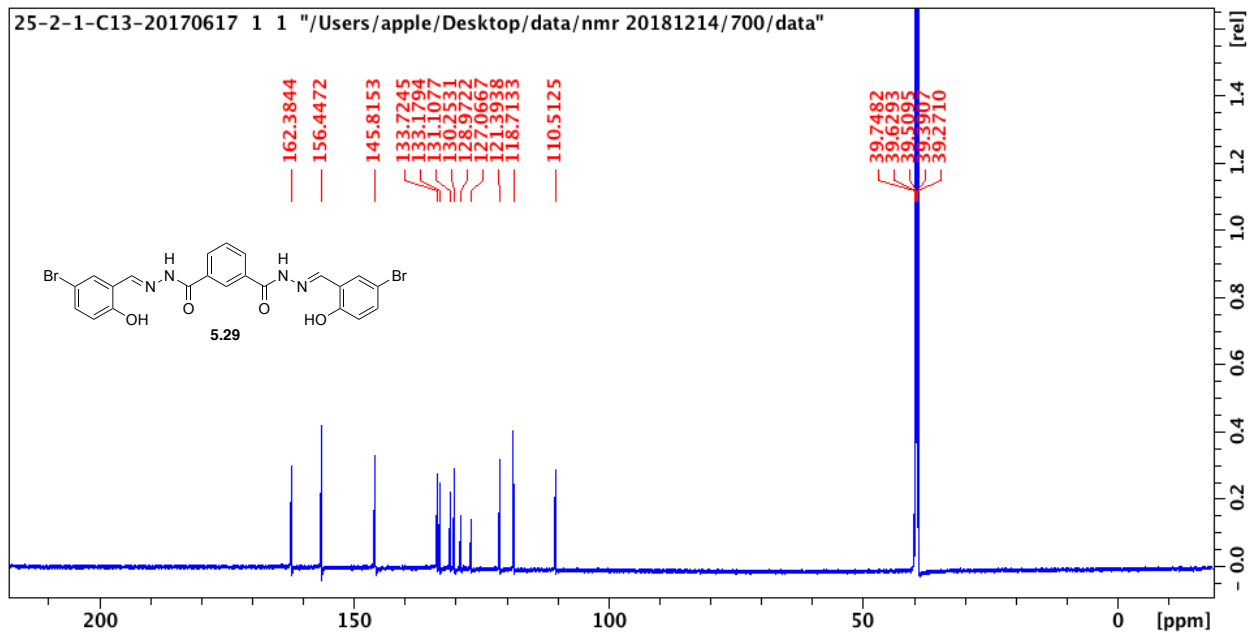

<sup>13</sup>C NMR of compound 5.29

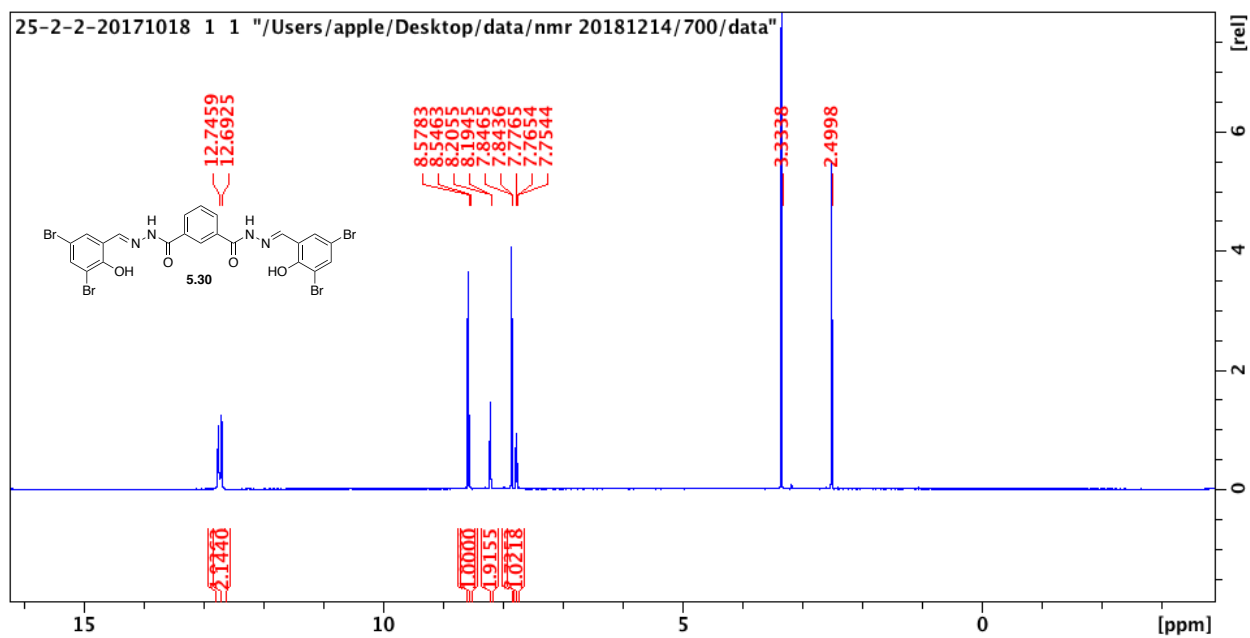

<sup>1</sup>H NMR of compound 5.30

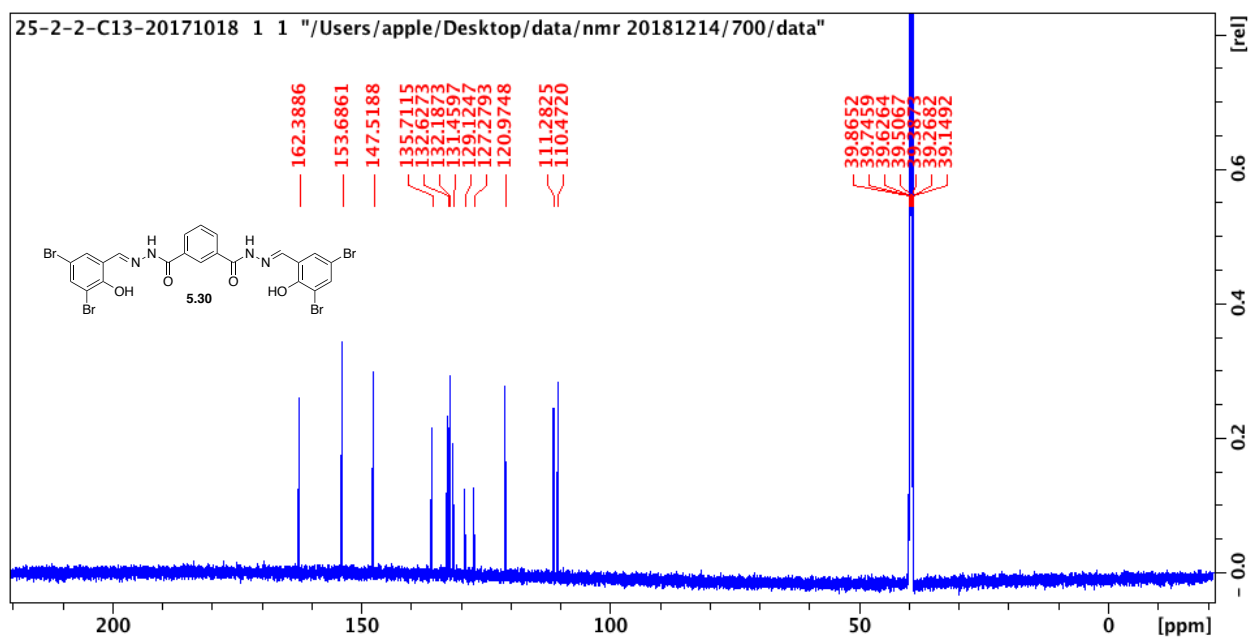

<sup>13</sup>C NMR of compound 5.30
